# Supplementary material
Source: publisher figshare collection journal article supplement (https://acs.figshare.com/ndownloader/files/4265473)

## Supporting Information

### A Versatile Solid-Phase Synthesis of Chromenes resembling Classical Cannabinoids

Dagmar C. Kapeller<sup>a</sup>, Stefan Bräse<sup>b\*</sup>

<sup>a</sup>Karlsruhe Institute of Technology, Campus North, ComPlat, Hermann-von-Helmholtz Platz 1, 76344 Eggenstein-Leopoldshafen, Germany.

<sup>b</sup>Karlsruhe Institute of Technology, Campus South, Institute of Organic Chemistry, Fritz-Haber-Weg 6, 76131 Karlsruhe, Germany.

E-mail: stefan.braese@kit.edu

Procedures and Analytical Data Page 1

References Page 43

Spectra Page 44

Compounds and solvents were purchased from commercial sources and used without further purification. Merrifield resin was obtained as PL-CMS (0.99 mmol/g, 75–150  $\mu$ m) from Varian. For TLC aluminum foils layered with silica gel (silica gel 60 F<sub>254</sub>) produced by Merck were used. Column chromatography was performed employing Merck silica gel 60 under flash conditions. <sup>1</sup>H and <sup>13</sup>C spectra were measured with Bruker Avance 250, 400 or 500 MHz spectrometers. Chemical shifts were reported in  $\delta$  (ppm) referenced to residual undeuterated solvents [CDCl<sub>3</sub> to 7.26 / 77.00 ppm, acetone-*d*<sub>6</sub> to 2.05 / 30.83 ppm, MeOD to 3.31 / 39.05 ppm and DMSO-*d*<sub>6</sub> to 2.50 / 39.43 ppm]. EI-MS and HRMS-spectra were measured with a Finnigan MAT 90 instrument. ESI spectra were recorded on a ESI-TOF MS Mariner TM Biospectrometry Workstation PerSeptive Biosystems. IR spectra were recorded with a Bruker FTIR device IFS 88, Raman spectra with a MultiRAM (Bruker) and both are reported in cm<sup>-1</sup>. Elemental analyses were performed using a Vario Micro device. Melting points were measured with an OptiMelt (SRS) or a Büchi Melting Point B-545 and are uncorrected. Microwave reactions were performed with a Synthos 3000 (Anton Paar).

General washing procedure for resins: CH<sub>2</sub>Cl<sub>2</sub>, 2  $\times$  H<sub>2</sub>O and DMF, 2  $\times$  H<sub>2</sub>O and THF, 3  $\times$  methanol and CH<sub>2</sub>Cl<sub>2</sub>, 4  $\times$  CH<sub>2</sub>Cl<sub>2</sub>. With 20 mL/g resin each.

Stereochemistry: All compounds are racemic, the drawn stereochemistry refers to the main diastereomer.

### 3,4-Dihydro-2*H*-pyran-2-methanol via 3,4-Dihydro-2*H*-pyran-2-carboxaldehyde:

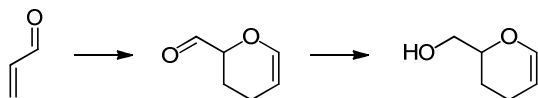

Freshly distilled acrolein (40.0 g, 48.0 mL, 710 mmol) and hydroquinone (50 mg) were distributed in 16 microwave vials á 3 mL. They were heated at first for 100 min at 800 W (140–145 °C), then for 50 min at 850 W (140–156 °C). Afterwards, the contents of the vials was filtered, washed with CH<sub>2</sub>Cl<sub>2</sub> and concentrated under reduced pressure to give 3,4-dihydro-2*H*-pyran-2-carboxaldehyde (20.0 g, 50%), pure enough to be immediately used in the next step.

To a solution of LiAlH<sub>4</sub> (2.05 g, 55.0 mmol) in THF (80 mL) under nitrogen (stirred for 30 min at r.t.) was added 3,4-dihydro-2*H*-pyran-2-carboxaldehyde (9.40 g, 84.0 mmol) in 20 mL of THF at –78 °C. The mixture was warmed up to –35 °C over the next 3 h and then quenched with acetone and water. A sat. aq solution of K/Na tartrate (100 mL), water (80 mL) and Et<sub>2</sub>O (100 mL) were added, the organic layer separated and the aqueous one extracted with Et<sub>2</sub>O (3 × 150 mL). The combined organic layers were dried (MgSO<sub>4</sub>), concentrated under reduced pressure and purified by flash chromatography [CH<sub>2</sub>Cl<sub>2</sub>/Et<sub>2</sub>O (20:1) up to (10:1)] to give 12.1 g (65%) of the product as a colorless oil.<sup>1</sup>

<sup>1</sup>H NMR (250 MHz, CDCl<sub>3</sub>): δ = 1.60–2.20 (m, 5H, OH+2CH<sub>2</sub>), 3.60–3.74 (m, 2H, OCH<sub>2</sub>), 3.87–3.98 (m, 1H, CH=), 4.67–4.74 (m, 1H, CH=), 6.39 (d, *J* = 6.1 Hz, 1H, OCH).

### Synthesis of DHP-resin 4:<sup>2</sup>

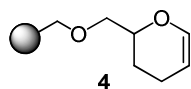

To a flask containing NaH (2.64 g, 66.0 mmol, 60% in mineral oil) under nitrogen were added dry THF (100 mL) and 3,4-dihydro-2*H*-pyran-2-methanol (7.00 g, 60.0 mmol). The mixture was stirred for 2 h at r.t., before being concentrated under reduced pressure and dissolved in dry DMF (100 mL). The mixture was added to Merrifield resin (suspended in 125 mL of DMF) and the flask was agitated

overnight. The solvent was filtered off and the resin washed four times with DMF/H<sub>2</sub>O (1/1), three times with DMF and another three times with CH<sub>2</sub>Cl<sub>2</sub>. Then the resin was dried under vacuum.

Anal. calcd for C<sub>70.55</sub>H<sub>73.82</sub>O<sub>2</sub>: C, 88.84; H, 7.80; O, 3.36; found: C, 88.86; H, 7.86.

<sup>13</sup>C NMR (100 MHz, CDCl<sub>3</sub>): δ = 19.4, 24.6, 72.3, 73.3, 74.0, 100.4, 143.6.

Raman: ν = 3055, 3002, 2977, 2903, 2852, 1651, 1603, 1584, 1450, 1329, 1200, 1183, 1156, 1032, 1002, 622.

### 6-Hydroxysalicylaldehyde *via* 5-Hydroxy-2,2-dimethyl-4*H*-benzo[*d*][1,3]dioxin-4-one:<sup>3,4</sup>

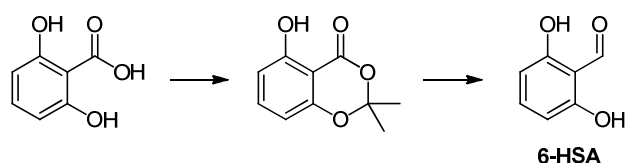

To a solution of 2,6-dihydroxybenzoic acid (9.24 g, 60.0 mmol) and DMAP (366 mg, 3.00 mmol) in DME (45 mL) were added acetone (4.53 g, 5.74 mL, 78.0 mmol) and SOCl<sub>2</sub> (9.28 g, 5.67 mL, 78.0 mmol) at 0 °C under nitrogen. Stirring was continued for 1 h at bath temperature, then 23 h at r.t. The reaction was poured into a sat. aqueous solution of NaHCO<sub>3</sub> (100 mL) and the aqueous phase was extracted with Et<sub>2</sub>O (3 × 100 mL). The combined organic layers were washed with brine, dried (MgSO<sub>4</sub>), concentrated under reduced pressure and purified by flash chromatography [cyclohexane/EtOAc (9:1); *R*<sub>f</sub> = 0.39] to give 9.72 g (84%) of colorless crystals.

<sup>1</sup>H NMR (250 MHz, CDCl<sub>3</sub>): δ = 1.75 (s, 6H, 2CH<sub>3</sub>), 6.34 (dd, *J* = 8.2, 0.7 Hz, 1H, Ar<sub>m</sub>-H), 6.64 (dd, *J* = 8.2, 0.7 Hz, 1H, Ar<sub>m</sub>-H), 7.41 (t, *J* = 8.2 Hz, 1H, Ar<sub>m</sub>-H), 10.34 (s, 1H, OH).

To a solution of 5-hydroxy-2,2-dimethyl-4*H*-benzo[*d*][1,3]dioxin-4-one (10.1 g, 52.0 mmol) in dry CH<sub>2</sub>Cl<sub>2</sub> (52 mL) was added DIBALH (1.2 M solution in toluene, 130 mL, 156 mmol) at -78 °C under nitrogen. Stirring continued for 6 h at bath temperature, after which 5 mL of MeOH were added. The reaction was poured carefully into a 0.5 M solution of HCl (300 mL). 150 mL of Et<sub>2</sub>O were added, the organic layer was separated and the aqueous one was extracted with Et<sub>2</sub>O (3 × 200 mL). The combined organic layers were washed with brine, dried (MgSO<sub>4</sub>), concentrated under reduced pressure and purified by flash chromatography [cyclohexane/EtOAc (6:1) up to (3:1); TLC in the latter solvent: *R*<sub>f</sub> = 0.34] to give 5.91 g (82%) of yellow crystals.

$^1\text{H}$  NMR (400 MHz,  $\text{CDCl}_3$ ):  $\delta$  = 6.39 (d,  $J$  = 8.3 Hz, 2H,  $\text{Ar}_m\text{-H}$ ), 7.33 (t,  $J$  = 8.3 Hz, 1H,  $\text{Ar}_m\text{-H}$ ), 10.37 (s, 1H, CHO).

### General Procedure for Immobilization of Salicylaldehydes:

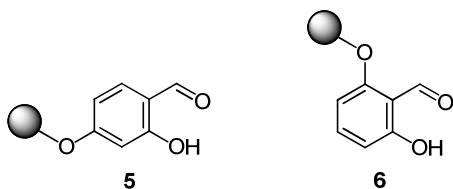

DHP-resin **4** was predried overnight at 100 °C, then suspended in a mixture of DCE/toluene (42/18 mL) under nitrogen. 4- or 6-HSA (4.15 g, 30.0 mmol) and PPTS (2.26 g, 9.00 mmol) were added and the mixture agitated at 55 °C overnight. Afterwards, the resin was filtered, washed and dried under vacuum to give resins **5** or **6**.

**5**: Loading: 0.25–0.43 mmol/g (up to 48% yield)

$^{13}\text{C}$  NMR (100 MHz,  $\text{CDCl}_3$ ):  $\delta$  = 17.3, 26.9, 29.2, 69.3, 72.9, 73.1, 96.0, 103.0, 109.1, 114.8, 135.8, 164.3, 165.1, 194.1.

Raman:  $\nu$  = 3055, 3002, 2977, 2903, 2852, 1643, 1638, 1603, 1584, 1450, 1329, 1200, 1183, 1156, 1032, 1002, 622.

**6**: Loading: 0.33–0.46 mmol/g (up to 52% yield)

$^{13}\text{C}$  NMR (100 MHz,  $\text{CDCl}_3$ ):  $\delta$  = 17.5, 26.9, 29.3, 69.3, 72.7, 73.2, 96.4, 107.3, 110.3, 114.8, 138.3, 162.0, 194.3.

Raman:  $\nu$  = 3055, 3002, 2976, 2903, 2853, 1644, 1603, 1584, 1450, 1327, 1308, 1200, 1183, 1156, 1032, 1002, 622.

### General Procedure for Cleavage:

200 mg of the resin were suspended in 4 mL of a 1:1 mixture of EtOH/DCE or a 6:1 mixture of THF/ $\text{H}_2\text{O}$ . Then PPTS (100 mg, 0.400 mmol) was added and the mixture was agitated at 70 °C overnight. The resin was separated by filtration, washed with 25 mL of EtOAc and the filtrate concentrated under reduced pressure. The crude product was diluted with EtOAc (15 mL) and water (10 mL). The organic layer was separated and the aqueous one extracted twice with EtOAc (15 mL).

The combined organic phases were dried (MgSO<sub>4</sub>) and concentrated under reduced pressure. After Diels-Alder reaction the crude product was additionally purified by flash chromatography.

**2-Hydroxy-4-[(tetrahydro-2H-pyran-2-yl)oxy]benzaldehyde (10):**

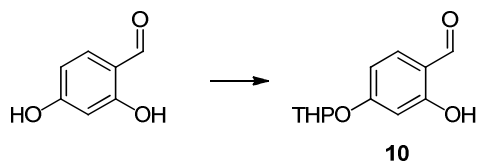

2,4-Dihydroxybenzaldehyde (4.14 g, 30.0 mmol) and PPTS (754 mg, 3.00 mmol) were dissolved in CH<sub>2</sub>Cl<sub>2</sub> (60 mL) under nitrogen atmosphere. DHP (3.02 g, 3.30 mL, 36.0 mmol) was added and the mixture stirred for 3 h at ambient temperature. Afterwards, 90 mL of a sat. solution of NaHCO<sub>3</sub> was added, the organic layer separated and the aqueous one extracted twice with EtOAc (90 mL). The combined organic layers were dried (MgSO<sub>4</sub>), concentrated under reduced pressure and purified by flash chromatography [cyclohexane/EtOAc (6:1), *R<sub>f</sub>* = 0.31] to give colorless crystals (5.63 g, 76%).<sup>5</sup>

<sup>1</sup>H NMR (250 MHz, CDCl<sub>3</sub>): δ = 1.50–2.20 (m, 6H, 3CH<sub>2</sub>), 3.58–3.67+3.76–3.89 (m, 2H, OCH<sub>2</sub>), 5.50 (t, *J* = 2.9 Hz, 1H, OCHO), 6.62 (d, *J* = 2.3 Hz, 1H, Ar<sub>m</sub>-H), 6.65 (dd, *J* = 8.4, 2.3 Hz, 1H, Ar<sub>m</sub>-H), 7.43 (d, *J* = 8.4 Hz, 1H, Ar<sub>m</sub>-H), 9.72 (s, 1 H, CHO), 11.63 (s, 1H, OH).

Major Regioisomer:

<sup>13</sup>C NMR (100 MHz, CDCl<sub>3</sub>): δ = 18.4, 24.9, 29.9, 62.1, 96.2, 103.6, 109.4, 115.7, 135.3, 164.1, 164.3, 194.5.

Minor Regioisomer:

<sup>13</sup>C NMR (100 MHz, CDCl<sub>3</sub>): δ = 19.7, 25.4, 30.6, 63.0, 94.7, 103.0, 108.8, 115.2, 136.0, 164.1, 164.4, 194.2.

**2-Hydroxy-6-[(tetrahydro-2H-pyran-2-yl)oxy]benzaldehyde (12):**

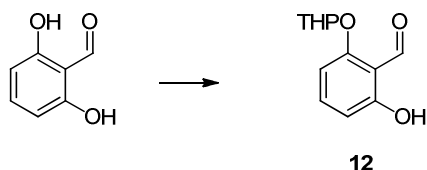

2,6-Dihydroxybenzaldehyde (2.07 g, 15.0 mmol) and PPTS (377 mg, 1.50 mmol) were dissolved in CH<sub>2</sub>Cl<sub>2</sub> (30 mL) under nitrogen atmosphere. DHP (1.51 g, 1.64 mL, 18.0 mmol) was added and the mixture stirred overnight at ambient temperature. Afterwards, 45 mL of a sat. solution of NaHCO<sub>3</sub> were added, the organic layer separated and the aqueous one extracted twice with EtOAc (45 mL). The combined organic layers were dried (MgSO<sub>4</sub>), concentrated under reduced pressure and purified by flash chromatography [cyclohexane/EtOAc (10:1), *R<sub>f</sub>* = 0.26] to give a yellow oil (2.21 g, 67%).

IR (KBr)  $\nu$  = 2946, 2877, 2944, 1643, 1620, 1582, 1459, 1334, 1240, 1203, 1120, 1059, 1036.

<sup>1</sup>H NMR (400 MHz, acetone-*d*<sub>6</sub>):  $\delta$  = 1.57–1.76 (m, 3H, 3CH<sub>2</sub>), 1.88–2.04 (m, 3H, 3CH<sub>2</sub>), 3.63 (tdd, *J* = 11.3, 4.0, 1.5 Hz, 1H, OCH<sub>2</sub>), 3.86 (ddd, *J* = 11.5, 11.3, 3.2 Hz, 1H, OCH<sub>2</sub>), 5.64 (t, *J* = 3.0 Hz, 1H, OCHO), 6.52 (d, *J* = 8.4 Hz, 1H, Ar<sub>m</sub>-H), 6.73 (d, *J* = 8.4 Hz, 1H, Ar<sub>m</sub>-H), 7.48 (t, *J* = 8.4 Hz, 1H, Ar<sub>m</sub>-H), 10.44 (s, 1H, CHO), 11.88 (s, 1H, OH).

<sup>13</sup>C NMR (100 MHz, acetone-*d*<sub>6</sub>):  $\delta$  = 20.2, 26.8, 31.6, 63.6, 98.5, 107.0, 111.6, 113.2, 140.4, 162.1, 165.1, 196.6.

MS (EI, 70 EV): *m/z* (%) = 222 (31) [M<sup>+</sup>], 194 (34), 137 (39), 136 (85), 108 (42), 85 (100).

HRMS–EI: *m/z* [M<sup>+</sup>] calcd for C<sub>12</sub>H<sub>14</sub>O<sub>4</sub>: 222.0892; found 222.0894.

### General Procedure for the DOMA condensation (Solid Phase):

1.00 g of the resin was suspended in 1,4-dioxane (10 mL) in a 20 mL vial. Nitrogen was bubbled through for a few minutes, before addition of K<sub>2</sub>CO<sub>3</sub> (552 mg, 4.00 mmol) and the Michael acceptor (6.00 mmol). The vial was closed and agitated at 80 °C for 4 d. After the second day another portion of the Michael acceptor (1.0 mmol) was added. At the end of the reaction, the resin was filtered, washed and dried under vacuum. The procedure was repeated a second time if remaining starting material could be detected after cleavage.

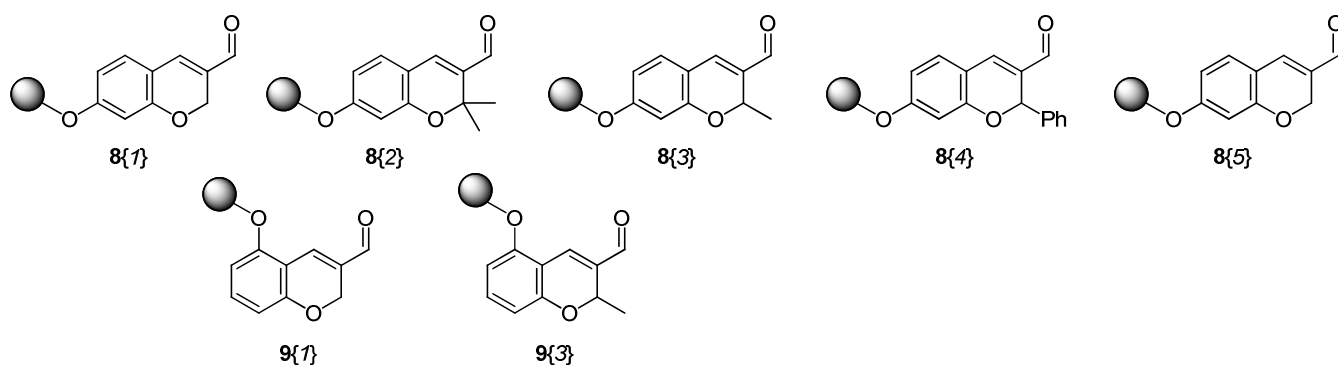

**8{1}**: resin is contaminated with ~25% of insoluble side products that complicate analysis but do not matter in the follow-up reactions.

$^{13}\text{C}$  NMR (100 MHz,  $\text{CDCl}_3$ ):  $\delta$  = 17.3, 27.0, 29.2, 63.3, 69.0, 73.0, 95.9, 104.1, 110.5, 114.4, 141.1, 161.4, 189.2.

Raman:  $\nu$  = 3055, 3002, 2976, 2903, 2854, 1671, 1631, 1604, 1584, 1562, 1450, 1314, 1275, 1200, 1183, 1156, 1032, 1002, 649, 622.

**After cleavage: 7-Hydroxy-2H-chromene-3-carbaldehyde:**

Yield: 65%. Orange solid. For analytical data see solution phase below.

**8{2}**:

$^{13}\text{C}$  NMR (100 MHz,  $\text{CDCl}_3$ ):  $\delta$  = 17.6, 26.8, 27.2 (2C), 29.5, 69.2, 73.1, 79.0, 96.1, 104.6, 110.0, 114.1, 136.6, 142.8, 156.0, 162.1, 190.0.

Raman:  $\nu$  = 3054, 3003, 2977, 2904, 2853, 1678, 1605, 1584, 1561, 1451, 1332, 1198, 1183, 1157, 1032, 1002.

**After cleavage: 7-Hydroxy-2,2-dimethyl-2H-chromene-3-carbaldehyde:**

Yield: 60–90%. Orange solid. For analytical data see solution phase below.

**8{3}**:

$^{13}\text{C}$  NMR (100 MHz,  $\text{CDCl}_3$ ):  $\delta$  = 17.4, 20.0, 27.3, 29.5, 69.0, 69.8, 73.1, 96.0, 105.0, 110.1, 140.2, 161.7, 189.5.

Raman:  $\nu = 3055, 3002, 2977, 2904, 2853, 1672, 1632, 1604, 1584, 1561, 1450, 1302, 1200, 1183, 1156, 1033, 1002, 622$ .

**After cleavage: 7-Hydroxy-2-methyl-2*H*-chromene-3-carbaldehyde:**

Yield: 90%. Yellow solid. For analytical data see solution phase below.

**8{4}:**

Raman  $\nu = 3056, 3001, 2976, 2903, 2854, 1675, 1620, 1604, 1586, 1561, 1451, 1275, 1200, 1182, 1156, 1033, 1003$ .

**After cleavage: 7-Hydroxy-2-phenyl-2*H*-chromene-3-carbaldehyde:**

Flash chromatography in cyclohexane/EtOAc (2:1).  $R_f = 0.42$ .

Yield: 38% + 27% starting material as an inseparable mixture.

$^1\text{H}$  NMR (500 MHz, acetone- $d_6$ ):  $\delta = 6.24$  (s, 1H, OCH), 6.36 (d,  $J = 2.3$  Hz, 1H, Ar<sub>m</sub>-H), 6.51 (dd,  $J = 8.3, 2.3$  Hz, 1H, Ar<sub>m</sub>-H), 7.25–7.32 (m, 4H, Ar<sub>m</sub>-H), 7.34–7.39 (m, 2H, Ar<sub>m</sub>-H), 7.66 (s, 1H, =CH), 9.40 (br.s, 1H, OH), 9.62 (s, 1H, CHO).

$^{13}\text{C}$  NMR (125 MHz, acetone- $d_6$ ):  $\delta = 75.8, 105.4, 111.7, 115.0, 128.4, 130.5$  (3C), 132.6, 133.1, 141.4, 132.8, 143.0, 158.4, 164.6, 191.4.

MS (EI, 70eV):  $m/z$  (%) = 252 (23) [ $\text{M}^+$ ], 223 (100), 175 (13), 165 (29), 152 (19).

HRMS–EI:  $m/z$  [ $\text{M}^+$ ] calcd for  $\text{C}_{16}\text{H}_{12}\text{O}_3$ : 252.0786; found: 252.0789.

**8{5}:**

Raman:  $\nu = 3055, 3003, 2977, 2916, 2854, 1659, 1604, 1584, 1565, 1448, 1204, 1156, 1032, 1002$ .

$^{13}\text{C}$  NMR (100 MHz,  $\text{CDCl}_3$ ):  $\delta = 17.4, 24.7, 27.1, 29.4, 64.2, 69.0, 73.8, 95.9, 103.3, 109.8, 113.1, 130.5, 134.6, 157.2, 161.1, 195.6$ .

**After cleavage: 1-(7-Hydroxy-2*H*-chromen-3-yl)ethanone:**

Yield: 50%. Yellow solid. For analytical data see solution phase below.

**9{I}**: resin is contaminated with ~50% of insoluble side products, which give difficulties at analysis.



Raman:  $\nu = 3056, 3001, 2977, 2914, 1722, 1673, 1628, 1603, 1584, 1451, 1309, 1182, 1156, 1032, 1002, 622$ .

**After cleavage: 5-Hydroxy-2*H*-chromene-3-carbaldehyde:**

Flash chromatography in cyclohexane/EtOAc (3:1).  $R_f = 0.30$ .

Yield: 32% (and 8% 6-HSA). Yellow solid.

$^1\text{H}$  NMR (400 MHz, MeOD):  $\delta = 4.88$  (d,  $J = 0.9$  Hz, 2H, OCH<sub>2</sub>), 6.32 (d,  $J = 8.2$  Hz, 1H, Ar<sub>m</sub>-H), 6.41 (dd,  $J = 8.2, 0.9$  Hz, 1H, Ar<sub>m</sub>-H), 7.11 (t,  $J = 8.2$  Hz, 1H, Ar<sub>m</sub>-H), 7.73 (d,  $J = 0.9$  Hz, 1H, =CH), 9.50 (s, 1H, CHO).

$^{13}\text{C}$  NMR (100 MHz, MeOD):  $\delta = 63.5, 108.2, 109.3, 111.9, 130.7, 134.9, 139.0, 157.4, 158.3, 191.7$ .

MS (EI, 70 eV):  $m/z$  (%) = 176 (44) [ $\text{M}^+$ ], 147 (69) [ $\text{C}_9\text{H}_7\text{O}_2^+$ ], 138 (67), 137 (58), 43 (100).

HRMS–EI:  $m/z$  [ $\text{M}^+$ ] calcd for  $\text{C}_{16}\text{H}_{22}\text{O}_4$ : 176.0473; found: 176.0471.

**9{3}:**

Raman:  $\nu = 3056, 3001, 2977, 2914, 1722, 1673, 1628, 1603, 1584, 1451, 1309, 1182, 1156, 1032, 1002, 622$ .

**After cleavage: 5-Hydroxy-2-methyl-2*H*-chromene-3-carbaldehyde:**

Flash chromatography in cyclohexane/EtOAc (3:1).  $R_f = 0.50$ .

Yield: 27% product plus many side products. Yellow solid.

$^1\text{H}$  NMR (400 MHz, acetone- $d_6$ ):  $\delta = 4.88$  (d,  $J = 0.9$  Hz, 2H, OCH<sub>2</sub>), 6.32 (d,  $J = 8.2$  Hz, 1H, Ar<sub>m</sub>-H), 6.41 (dd,  $J = 8.2, 0.9$  Hz, 1H, Ar<sub>m</sub>-H), 7.11 (t,  $J = 8.2$  Hz, 1H, Ar<sub>m</sub>-H), 7.73 (d,  $J = 0.9$  Hz, 1H, =CH), 9.50 (s, 1H, CHO).

$^{13}\text{C}$  NMR (125 MHz, acetone- $d_6$ ):  $\delta = 20.8, 70.8, 109.9, 110.0, 111, 135.5, 136.2, 136.8, 156.9, 157.5, 191.6$ .

**15 (after cleavage of 14a/b):**

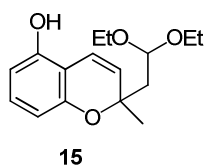

Flash chromatography in cyclohexane/EtOAc (3:1).  $R_f = 0.42$ .

Yield: 25%. Yellow oil.

$^1\text{H}$  NMR (250 MHz, MeOD):  $\delta = 1.146$  (t,  $J = 7.1$ , 3H,  $\text{CH}_3$ ), 1.151 (t,  $J = 7.1$ , 3H,  $\text{CH}_3$ ), 1.38 (s, 3H,  $\text{CH}_3$ ), 1.99 (dd,  $J = 5.1, 2.3$  Hz, 2H,  $\text{CH}_2$ ), 3.40–3.70 (m, 4H,  $2\text{CH}_2$ ), 4.77 (t,  $J = 5.1$  Hz, 1H, CH), 5.59 (d,  $J = 10.1$  Hz,  $\text{CH}=\text{CH}$ ), 6.23 (d,  $J = 8.1$  Hz, 1H,  $\text{Ar}_m\text{-H}$ ), 6.30 (dd,  $J = 8.1, 0.9$  Hz, 1H,  $\text{Ar}_m\text{-H}$ ), 6.64 (d,  $J = 10.1$  Hz, 1H,  $=\text{CH}$ ), 6.87 (t,  $J = 8.1$  Hz, 1H,  $\text{Ar}_m\text{-H}$ ).

$^{13}\text{C}$  NMR (125 MHz, acetone- $d_6$ ):  $\delta = 16.6, 16.7, 27.8, 46.4, 62.2, 62.8, 78.2, 101.6, 109.5, 109.7, 111.3, 118.4, 129.7, 130.7, 155.0, 155.7$ .

MS (EI, 70 eV):  $m/z$  (%) = 278 (14) [ $\text{M}^+$ ], 232 (11) [ $\text{C}_{14}\text{H}_{16}\text{O}_3^+$ ], 161 (100), 103 (23), 75 (9), 47 (9).

HRMS–EI  $m/z$  [ $\text{M}^+$ ] calcd for  $\text{C}_{16}\text{H}_{22}\text{O}_4$ : 278.1518; found: 278.1519.

### General Optimized Procedure for the DOMA Condensation (Solution Phase):

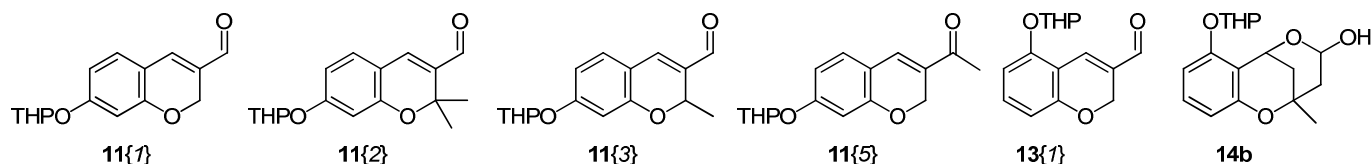

To a solution of 2-hydroxy-4-[(tetrahydro-2*H*-pyran-2-yl)oxy]benzaldehyde or 2-hydroxy-6-[(tetrahydro-2*H*-pyran-2-yl)oxy]benzaldehyde (3.00 mmol) and  $\text{K}_2\text{CO}_3$  (207 mg, 1.50 mmol) in 1,4-dioxane (6 mL) was added the Michael acceptor (4.50 mmol). The mixture was heated for 3 d at 80 °C. After half of the time another portion of the Michael acceptor (1.00 mmol) was added. The reaction was quenched by adding a sat. aqueous solution of  $\text{NaHCO}_3$  (15 mL) and EtOAc (15 mL), then the aqueous layer was separated and extracted with EtOAc ( $2 \times 10$  mL). The combined organic layers were dried, concentrated under reduced pressure and purified by flash chromatography.

**7-[(Tetrahydro-2H-pyran-2-yl)oxy]-2H-chromene-3-carbaldehyde (11{I}):**

Flash chromatography in cyclohexane/EtOAc (6:1).  $R_f$  = 0.26. Yield: 89%. Yellow crystals.

Mp 174 °C (cyclohexane).

IR (DRIFT):  $\nu$  = 3306, 3070, 2943, 2877, 1666, 1611, 1561, 1494, 1461, 1439, 1402, 1372, 1352, 1273, 1202, 1169, 1123, 1106.

$^1\text{H}$  NMR (250 MHz,  $\text{CDCl}_3$ ):  $\delta$  = 1.54–2.06 (m, 6H, 3CH<sub>2</sub>), 3.56–3.67+3.79–3.91 (m, 2H, OCH<sub>2</sub>), 5.01 (s, 2H, OCH<sub>2</sub>), 5.43 (t,  $J$  = 2.9 Hz, 1H, OCHO), 6.59 (d,  $J$  = 2.2 Hz, 1H, Ar<sub>m</sub>-H), 6.65 (dd,  $J$  = 8.4, 2.2 Hz, 1H, Ar<sub>m</sub>-H), 7.12 (d,  $J$  = 8.4 Hz, 1H, Ar<sub>m</sub>-H), 7.21 (s, 1H, =CH), 9.51 (s, 1H, CHO).

$^{13}\text{C}$  NMR (100 MHz,  $\text{CDCl}_3$ ):  $\delta$  = 18.5, 25.0, 30.0, 62.1, 63.4, 96.2, 104.2, 110.6, 114.5, 129.2, 130.4, 141.5, 157.7, 161.5, 189.5.

MS (EI, 70 eV):  $m/z$  (%) = 260 (1) [ $\text{M}^+$ ], 174 (15) [ $\text{C}_{10}\text{H}_8\text{O}_3^+$ ], 147 (7), 85 (11), 58 (22), 43 (100).

MS (FAB<sup>+</sup>):  $m/z$  (%) = 261 (45) [ $\text{MH}^+$ ], 217 (18), 177 (100) [ $\text{C}_{10}\text{H}_{11}\text{O}_3^+$ ], 176 (52) [ $\text{C}_{10}\text{H}_{10}\text{O}_3^+$ ], 154 (56), 137 (36), 136 (46), 85 (56).

HRMS–FAB:  $m/z$  [ $\text{MH}^+$ ] calcd for  $\text{C}_{15}\text{H}_{17}\text{O}_4$ : 261.1127; found: 261.1124.

**2,2-Dimethyl-7-[(tetrahydro-2H-pyran-2-yl)oxy]-2H-chromene-3-carbaldehyde (11{2}):**

Flash chromatography in cyclohexane/ $\text{CH}_2\text{Cl}_2$  (2:3) to  $\text{CH}_2\text{Cl}_2$ . Latter  $R_f$  = 0.40. Yield: 44%. Brown solid, slightly impure but attempts of further purification by recrystallization failed.

IR (DRIFT):  $\nu$  = 3318, 3072, 2944, 2874, 2730, 1885, 1780, 1666, 1607, 1563, 1499, 1436, 1359, 1331, 1275, 1161, 1114, 1037.

$^1\text{H}$  NMR (250 MHz, acetone- $d_6$ ):  $\delta$  = 1.56 (s, 6H, 2CH<sub>3</sub>), 1.50–2.00 (m, 6H, 3CH<sub>2</sub>), 3.55–3.68+3.74–3.88 (m, 2H, OCH<sub>2</sub>), 5.51 (t,  $J$  = 2.9 Hz, 1H, OCHO), 6.51 (d,  $J$  = 2.3 Hz, 1H, Ar<sub>m</sub>-H), 6.64 (dd,  $J$  = 8.4, 2.3 Hz, 1H, Ar<sub>m</sub>-H), 7.26 (d,  $J$  = 8.4 Hz, 1H, Ar<sub>m</sub>-H), 7.34 (s, 1H, =CH), 9.43 (s, 1H, CHO).

$^{13}\text{C}$  NMR (100 MHz, acetone- $d_6$ ):  $\delta$  = 20.4, 26.8, 28.0 (2C), 31.8, 63.6, 80.3, 98.0, 105.7, 111.9, 115.7, 132.0, 138.5, 144.0, 157.4, 163.8, 191.7.

MS (FAB<sup>+</sup>):  $m/z$  (%) = 289 (19) [ $\text{MH}^+$ ], 206 (18) [ $\text{C}_{11}\text{H}_{14}\text{O}_3^+$ ], 205 (71) [ $\text{C}_{11}\text{H}_{13}\text{O}_3^+$ ], 204 (49) [ $\text{C}_{11}\text{H}_{12}\text{O}_3^+$ ], 203 (23), 189 (45), 85 (100).

HRMS–FAB:  $m/z$  [ $\text{MH}^+$ ] calcd for  $\text{C}_{17}\text{H}_{21}\text{O}_4$ : 289.1440; found: 289.1443.

**2-Methyl-7-[(tetrahydro-2H-pyran-2-yl)oxy]-2H-chromene-3-carbaldehyde (11{3}):**

Flash chromatography in cyclohexane/EtOAc (6:1).  $R_f$  = 0.27. Yield: 75%. Orange oil.

2 Diastereomers not separable ~1:1.

IR (KBr):  $\nu$  = 2944, 2872, 2712, 1670, 1608, 1559, 1494, 1441, 1391, 1325, 1301, 1271, 1230, 1203, 1168, 1121, 1102, 1074, 1036, 1022.

$^1\text{H}$  NMR (250 MHz, acetone- $d_6$ ):  $\delta$  = 1.28+1.29 (d,  $J$  = 6.5 Hz, 3H,  $\text{CH}_3$ ), 1.55–2.00 (m, 6H,  $3\text{CH}_2$ ), 3.55–3.67+3.74–3.88 (m, 2H,  $\text{OCH}_2$ ), 5.31 (q,  $J$  = 6.5 Hz, 1H, CH), 5.48–5.63 (m, 1H,  $\text{OCHO}$ ), 6.55–6.58 (m, 1H,  $\text{Ar}_m\text{-H}$ ), 6.68 (dd,  $J$  = 8.4, 2.3 Hz, 1H,  $\text{Ar}_m\text{-H}$ ), 7.29 (d,  $J$  = 8.4 Hz, 1H,  $\text{Ar}_m\text{-H}$ ), 7.42 (s, 1H, =CH), 9.52 (s, 1H, CHO).

$^{13}\text{C}$  NMR (100 MHz, acetone- $d_6$ ):  $\delta$  = 20.37+20.40, 21.20+21.24, 26.8+28.5, 31.79+31.84, 63.5+63.6, 71.5+71.6, 97.9+98.1, 106.2+106.3, 112.1+112.2, 115.92+115.94, 132.3, 135.75+135.77, 141.56+141.62, 157.58+157.60, 163.5+163.6, 191.3.

MS ( $\text{FAB}^+$ ):  $m/z$  (%) = 275 (28) [ $\text{MH}^+$ ], 191 (100) [ $\text{C}_{11}\text{H}_{11}\text{O}_3^+$ ], 190 (46) [ $\text{C}_{11}\text{H}_{10}\text{O}_3^+$ ], 175 (15), 85 (85).

HRMS–FAB:  $m/z$  [ $\text{MH}^+$ ] calcd for  $\text{C}_{16}\text{H}_{19}\text{O}_4$ : 275.1283; found: 275.1280.

**1-[7-[(Tetrahydro-2H-pyran-2-yl)oxy]-2H-chromen-3-yl]ethanone (11{5}):**

Flash chromatography in cyclohexane/EtOAc (6:1).  $R_f$  = 0.26. Yield: 67%. Yellow crystals.

Mp 83–85 °C.

IR (Diamant-ATR)  $\nu$  = 2934, 2870, 1654, 1633, 1609, 1340, 1286, 1271, 1253, 1201, 1179, 1142, 1108, 1047, 1021.

$^1\text{H}$  NMR (400 MHz,  $\text{CDCl}_3$ ):  $\delta$  = 1.52–2.00 (m, 6H,  $3\text{CH}_2$ ), 2.35 (s, 3H,  $\text{CH}_3$ ), 3.60 (tdd,  $J$  = 10.2, 4.3, 1.1 Hz, 1H,  $\text{OCH}_2$ ), 3.80 (tdd,  $J$  = 11.5, 9.5, 3.2 Hz, 1H,  $\text{OCH}_2$ ), 4.89 (d,  $J$  = 1.1 Hz, 2H,  $\text{OCH}_2$ ), 5.48 (t,  $J$  = 3.3 Hz, 1H,  $\text{OCHO}$ ), 6.54 (d,  $J$  = 2.3 Hz, 1H,  $\text{Ar}_m\text{-H}$ ), 6.66 (dd,  $J$  = 8.4, 2.3 Hz, 1H,  $\text{Ar}_m\text{-H}$ ), 7.23 (d,  $J$  = 8.4 Hz, 1H,  $\text{Ar}_m\text{-H}$ ), 7.55 (s, 1H, CH=).

$^{13}\text{C}$  NMR (100 MHz, Acetone- $d_6$ ):  $\delta$  = 20.4, 26.0, 26.8, 31.8, 63.5, 65.8, 98.0, 105.6, 112.2, 116.8, 129.9, 132.2, 135.6, 158.7, 162.6, 196.8.

MS (EI, 70 EV):  $m/z$  (%) = 274 (7) [ $\text{M}^+$ ], 190 (100), 147 (48), 85 (14).

HRMS–EI:  $m/z$  [ $MH^+$ ] calcd for  $C_{16}H_{18}O_4$ : 274.1205; found: 274.1207.

**5-[(Tetrahydro-2H-pyran-2-yl)oxy]-2H-chromene-3-carbaldehyde (13{I}):**

Flash chromatography in cyclohexane/EtOAc (20:1).  $R_f$  = 0.17. Yield: 43% (+20% SM). Pale yellow crystals.

IR (ATR):  $\nu$  = 2934, 2876, 2812, 1657, 1627, 1600, 1575, 1468, 1397, 1343, 1307, 1286, 1256, 1234, 1204, 1187, 1164, 1117, 1049, 1035, 1019.

$^1H$  NMR (500 MHz, acetone- $d_6$ ):  $\delta$  = 1.58–1.77 (m, 3H, 3CH<sub>2</sub>), 1.89–1.96 (m, 2H, CH<sub>2</sub>), 2.02–2.10 (m, 1H, CH<sub>2</sub>), 3.61 (tdd,  $J$  = 11.3, 4.1, 1.2 Hz, 1H, OCH<sub>2</sub>), 3.83 (tdd,  $J$  = 21.3, 19.9, 3.2 Hz, 1H, OCH<sub>2</sub>), 4.91 (dAB-sys.,  $J$  = 14.1, 1.1 Hz, 2H, OCH<sub>2</sub>), 5.57 (d,  $J$  = 3.1 Hz, 1H, OCHO), 6.51 (d,  $J$  = 8.2 Hz, 1H, Ar<sub>m</sub>-H), 6.78 (d,  $J$  = 8.2 Hz, 1H, Ar<sub>m</sub>-H), 7.27 (t,  $J$  = 8.2 Hz, 1H, Ar<sub>m</sub>-H), 7.81 (s, 1H, CH=), 9.64 (s, 1H, CHO).

$^{13}C$  NMR (125 MHz, acetone- $d_6$ ):  $\delta$  = 20.4, 26.8, 31.8, 63.6, 64.2, 98.3, 109.5, 111.1, 113.4, 139.9, 132.3, 137.7, 156.7, 158.7, 191.6.

MS (EI, 70 eV):  $m/z$  (%) = 260 (13) [ $M^+$ ], 176 (75), 147 (31), 85 (100).

HRMS–EI:  $m/z$  [ $M^+$ ] calcd for  $C_{15}H_{16}O_4$ : 260.1049; found: 260.1048.

**2-Methyl-7-[(tetrahydro-2H-pyran-2-yl)oxy]-2,3,4,6-tetrahydro-2,6-methanobenzo[*b*][1,5]dioxcin-4-ol (14b):**

Flash chromatography in cyclohexane/EtOAc (2:1).  $R_f$  = 0.27. Yield: 69%. Colorless crystals.

Diastereomeric mixture (3 : 2).

IR (ATR):  $\nu$  = 3329, 2927, 1703, 1588, 1462, 1344, 1284, 1235, 1194, 1181, 1160, 1122, 1096, 1057, 1022.

MS (EI, 70 eV):  $m/z$  (%) = 306 (5) [ $M^+$ ], 222 (65), 204 (16), 161 (54), 160 (100), 85 (65), 85 (30), 43 (83).

HRMS–EI:  $m/z$  [ $M^+$ ] calcd for  $C_{17}H_{22}O_5$ : 306.1467; found: 306.1465.

Major Diastereomer:

$^1\text{H}$  NMR (500 MHz, acetone- $d_6$ ):  $\delta$  = 1.403 (s, 3H,  $\text{CH}_3$ ), 1.52–1.71 (m, 6H,  $3\text{CH}_2$ ), 1.81–1.86 (m, 2H,  $\text{CH}_2$ ), 2.09 (dt,  $J$  = 13.3, 3.8 Hz, 2H,  $\text{CH}_2$ ), 2.09 (s, 1H, OH), 3.49–3.58 (m, 1H,  $\text{OCH}_2$ ), 3.81 (ddd,  $J$  = 11.4, 9.7, 3.1 Hz, 1H,  $\text{OCH}_2$ ), 5.20 (d,  $J$  = 6.5 Hz, 1H, OCH), 5.28–5.32 (m, 1H, OCHO), 5.43 (t,  $J$  = 3.2 Hz, 1H, OCHO), 6.41 (d,  $J$  = 8.2 Hz, 1H,  $\text{Ar}_m\text{-H}$ ), 6.64 (d,  $J$  = 8.2 Hz, 1H,  $\text{Ar}_m\text{-H}$ ), 7.10 (t,  $J$  = 8.2 Hz, 1H,  $\text{Ar}_m\text{-H}$ ).

$^{13}\text{C}$  NMR (125 MHz, acetone- $d_6$ ):  $\delta$  = 20.6, 27.0, 29.9, 32.0, 36.5, 48.1, 63.4, 63.5, 76.0, 91.2, 98.5, 109.0, 110.7, 113.2, 131.3, 156.8, 158.7.

Minor Diastereomer:

$^1\text{H}$  NMR (500 MHz, acetone- $d_6$ ):  $\delta$  = 1.400 (s, 3H,  $\text{CH}_3$ ), 1.52–1.71 (m, 6H,  $3\text{CH}_2$ ), 1.81–1.86 (m, 2H,  $\text{CH}_2$ ), 2.00 (dt,  $J$  = 13.8, 2.5 Hz, 2H,  $\text{CH}_2$ ), 2.09 (s, 1H, OH), 3.49–3.58 (m, 1H,  $\text{OCH}_2$ ), 3.93 (ddd,  $J$  = 11.4, 9.7, 3.1 Hz, 1H,  $\text{OCH}_2$ ), 5.17 (d,  $J$  = 6.5 Hz, 1H, OCH), 5.28–5.32 (m, 1H, OCHO), 5.45 (t,  $J$  = 3.2 Hz, 1H, OCHO), 6.38 (d,  $J$  = 8.2 Hz, 1H,  $\text{Ar}_m\text{-H}$ ), 6.63 (d,  $J$  = 8.2 Hz, 1H,  $\text{Ar}_m\text{-H}$ ), 7.09 (t,  $J$  = 8.2 Hz, 1H,  $\text{Ar}_m\text{-H}$ ).

$^{13}\text{C}$  NMR (125 MHz, acetone- $d_6$ ):  $\delta$  = 20.5, 27.02, 29.9, 32.1, 36.5, 48.1, 63.3, 63.4, 76.0, 91.2, 97.8, 107.6, 110.2, 112.5, 131.3, 156.7, 158.6.

### Side reactions under DOMA-Conditions of Acrolein/Senecialdehyde with Unprotected 4-HSA:

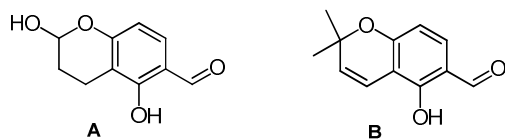

### 2,5-Dihydroxychroman-6-carbaldehyde (A):

Flash chromatography in cyclohexane/EtOAc (2:1).  $R_f$  = 0.40. Yield: 50%. Yellow crystals.

Mp 76–79 °C.

IR (ATR)  $\nu$  = 3447, 3106, 2875, 2543, 1622, 1580, 1485, 1422, 1373, 1275, 1235, 1176, 1142, 1124, 1083.

$^1\text{H}$  NMR (400 MHz, acetone- $d_6$ ):  $\delta$  = 1.88–2.04 (m, 2H,  $\text{CH}_2$ ), 2.69–2.74 (m, 3H,  $\text{CH}_2$ ), 5.67 (bs, 1H, OCHO), 6.32 (br. s, 1H, OH), 6.45 (d,  $J$  = 8.6 Hz, 1 H,  $\text{Ar}_m\text{-H}$ ), 7.47 (d,  $J$  = 8.6 Hz, 1 H,  $\text{Ar}_m\text{-H}$ ), 9.75 (s, 1H, CHO), 11.85 (s, 1H, OH).

$^{13}\text{C}$  NMR (100 MHz, acetone- $d_6$ ):  $\delta$  = 15.8, 28.1, 94.7, 111.7, 111.8, 116.4, 134.7, 162.1, 163.0, 197.3.

MS (EI, 70 eV):  $m/z$  (%) = 194 (86) [ $M^+$ ], 166 (63), 151 (50), 138 (28), 55 (75), 39 (100).

HRMS–EI:  $m/z$  [ $M^+$ ] calcd for  $C_{10}H_{10}O_4$ : 194.0579; found: 194.0578.

### 5-Hydroxy-2,2-dimethyl-2*H*-chromene-6-carbaldehyde (B):

Flash chromatography in cyclohexane/EtOAc (2:1).  $R_f$  = 0.63. Yield: 12% + 40% starting material.

$^1H$  NMR (250 MHz, acetone- $d_6$ ):  $\delta$  = 1.45 (s, 6H, 2CH<sub>3</sub>), 5.77 (d,  $J$  = 10.0 Hz, 1H, CH=), 6.47 (d,  $J$  = 8.5 Hz, 1H, Ar<sub>m</sub>-H), 6.65 (d,  $J$  = 10.0 Hz, 1H, CH=), 7.54 (d,  $J$  = 8.5 Hz, 1H, Ar<sub>m</sub>-H), 9.76 (s, 1H, CHO), 11.81 (s, 1H, OH).

$^{13}C$  NMR (125 MHz, acetone- $d_6$ ):  $\delta$  = 29.5 (2C), 79.9, 110.4, 111.1, 116.5, 117.2, 130.9, 137.1, 160.2, 162.2, 197.5.

MS (EI, 70 eV):  $m/z$  (%) = 204 (20) [ $M^+$ ], 189 (100), 187 (30).

HRMS–EI:  $m/z$  [ $M^+$ ] calcd for  $C_{10}H_{10}O_4$ : 204.0786; found: 204.0784.

### General Procedure for THP-Cleavage (Solution Phase):

To a solution of the THP ether (0.75 mmol) in methanol (11 mL) was added *p*-TsOH•H<sub>2</sub>O (29 mg, 0.15 mmol) and stirring continued for 3 h. The crude mixture was concentrated under reduced pressure, diluted with EtOAc (20 mL) and water (25 mL), the organic layer was separated and the aqueous one extracted twice with EtOAc (20 mL). The combined organic layers were dried (MgSO<sub>4</sub>) and concentrated under reduced pressure and purified by flash chromatography.

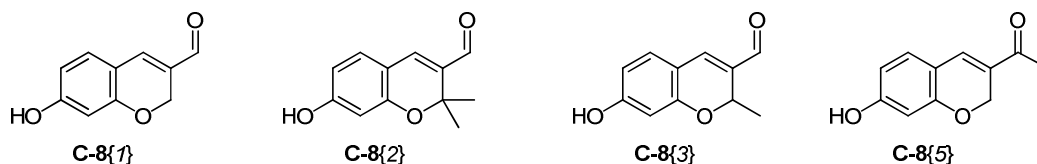

### 7-Hydroxy-2*H*-chromene-3-carbaldehyde (C-8{1}):

Flash chromatography in cyclohexane/EtOAc (2:1).  $R_f$  = 0.30. Yield: 80%. Orange solid.

Mp 191–201 °C (CH<sub>2</sub>Cl<sub>2</sub>/EtOAc).

$^1\text{H}$  NMR (400 MHz,  $\text{DMSO}-d_6$ ):  $\delta$  = 4.88 (d,  $J$  = 0.9 Hz, 2H,  $\text{OCH}_2$ ), 6.28 (d,  $J$  = 2.1 Hz, 1H,  $\text{Ar}_m\text{-H}$ ), 6.45 (dd,  $J$  = 8.3, 2.3 Hz, 1H,  $\text{Ar}_m\text{-H}$ ), 7.21 (d,  $J$  = 8.3 Hz, 1H,  $\text{Ar}_m\text{-H}$ ), 7.52 (d,  $J$  = 0.6 Hz, 1H, =CH), 9.47 (s, 1H, CHO), 10.30 (bs, 1H, OH).

$^{13}\text{C}$  NMR (100 MHz,  $\text{DMSO}-d_6$ ):  $\delta$  = 63.2, 103.1, 110.4, 113.0, 128.0, 131.8, 142.3, 157.7, 162.9, 190.3.

MS (EI, 70eV):  $m/z$  (%) = 176 (100) [ $\text{M}^+$ ], 147 (84) [ $\text{M}^+ - \text{CHO}$ ], 137 (36).

HRMS–EI:  $m/z$  [ $\text{M}^+$ ] calcd for  $\text{C}_{10}\text{H}_8\text{O}_3$ : 176.0473; found: 176.0475.

### **7-Hydroxy-2,2-dimethyl -2*H*-chromene-3-carbaldehyde (C-8{2}):**

Flash chromatography in cyclohexane/EtOAc (4:1).  $R_f$  = 0.25. Yield: 78%. Brown solid.

Mp 143 °C (cyclohexane/EtOAc = 3:1).

IR (ATR):  $\nu$  = 2919, 1645, 1609, 1550, 1455, 1379, 1359, 1249, 1193, 1160, 1128, 1100.

$^1\text{H}$  NMR (400 MHz, acetone- $d_6$ ):  $\delta$  = 1.55 (s, 6H, 2 $\text{CH}_3$ ), 6.31 (d,  $J$  = 2.3 Hz, 1H,  $\text{Ar}_m\text{-H}$ ), 6.47 (dd,  $J$  = 8.3, 2.3 Hz, 1H,  $\text{Ar}_m\text{-H}$ ), 7.19 (d,  $J$  = 8.3 Hz, 1H,  $\text{Ar}_m\text{-H}$ ), 7.30 (s, 1H, =CH), 9.00–9.22 (bs, 1H, OH), 9.40 (s, 1H, CHO).

$^{13}\text{C}$  NMR (100 MHz, acetone- $d_6$ ):  $\delta$  = 27.9 (2C), 80.2, 104.9, 111.2, 114.3, 132.5, 137.7, 144.4, 157.8, 164.6, 191.5.

MS (EI, 70 eV):  $m/z$  (%) = 204 (18) [ $\text{M}^+$ ], 189 (100).

HRMS–EI:  $m/z$  [ $\text{M}^+$ ] calcd for  $\text{C}_{12}\text{H}_{12}\text{O}_3$ : 204.0786; found: 204.0790.

### **7-Hydroxy-2-methyl -2*H*-chromene-3-carbaldehyde (C-8{3}):**

Flash chromatography in cyclohexane/EtOAc (2:1).  $R_f$  = 0.39. Yield: 70%. Yellow solid.

Mp 157 °C (cyclohexane/EtOAc = 3:1).

IR (ATR):  $\nu$  = 2926, 1638, 1603, 1550, 1393, 1361, 1280, 1165, 1095.

$^1\text{H}$  NMR (400 MHz, acetone- $d_6$ ):  $\delta$  = 1.27 (d,  $J$  = 6.5 Hz, 3H,  $\text{CH}_3$ ), 5.28 (q,  $J$  = 6.5 Hz, 1H, OCH), 6.36 (d,  $J$  = 2.3 Hz, 1H,  $\text{Ar}_m\text{-H}$ ), 6.50 (dd,  $J$  = 8.3, 2.3 Hz, 1H,  $\text{Ar}_m\text{-H}$ ), 7.22 (d,  $J$  = 8.3 Hz, 1H,  $\text{Ar}_m\text{-H}$ ), 7.39 (s, 1H, =CH), 9.12 (s, 1H, OH), 9.49 (s, 1H, CHO).



$^{13}\text{C}$  NMR (100 MHz, acetone- $d_6$ ):  $\delta$  = 21.1, 71.5, 105.3+105.4, 111.4+111.5, 114.6, 132.8, 134.9, 142.0, 158.0, 164.2+164.3, 191.2.

MS (EI, 70 eV):  $m/z$  (%) = 190 (26) [ $\text{M}^+$ ], 175 (100).

HRMS–EI:  $m/z$  [ $\text{M}^+$ ] calcd for  $\text{C}_{11}\text{H}_{10}\text{O}_3$ : 190.0630; found: 190.0631.

### 7-Hydroxy-2-methyl -2*H*-chromene-3-carbaldehyde (C-8{5}):

Flash chromatography in cyclohexane/EtOAc (2:1).  $R_f$  = 0.39. Yield: 95%. Yellow solid.

Mp 189–190 °C.

$^1\text{H}$  NMR (500 MHz, acetone- $d_6$ ):  $\delta$  = 2.33 (s, 3H,  $\text{CH}_3$ ), 4.87 (d,  $J$  = 1.1 Hz, 2H,  $\text{OCH}_2$ ), 6.33 (d,  $J$  = 2.2 Hz, 1H,  $\text{Ar}_m\text{-H}$ ), 6.49 (dd,  $J$  = 8.3, 2.2 Hz, 1H,  $\text{Ar}_m\text{-H}$ ), 7.17 (d,  $J$  = 8.3 Hz, 1H,  $\text{Ar}_m\text{-H}$ ), 7.53 (s, 1H, =CH), 9.01 (s, 1H, OH).

$^{13}\text{C}$  NMR (100 MHz, acetone- $d_6$ ):  $\delta$  = 25.9, 65.8, 104.7, 111.5, 115.2, 129.0, 132.7, 136.0, 159.1, 163.4, 196.7.

MS (EI, 70 eV):  $m/z$  (%) = 190 (60) [ $\text{M}^+$ ], 175 (14), 147 (100), 43 (42).

HRMS–EI:  $m/z$  [ $\text{M}^+$ ] calcd for  $\text{C}_{11}\text{H}_{10}\text{O}_3$ : 190.0630; found: 190.0632.

### General Procedure for the Wittig reaction (Solid Phase):

Methyl triphenylphosphonium bromide (1.79 g, 5.00 mmol) was suspended in dry THF (14 mL) under nitrogen and cooled to  $-25$  °C. *n*-BuLi (3.10 mL, 5.00 mmol, 1.6 M solution in hexanes) was added (yellow color) and the mixture stirred for 2 h ( $-25$  °C up to r.t.). Afterwards, it was cooled to  $-35$  °C and added to the resin (1.65 g), which was previously suspended in 12 mL of dry THF, also cooled to  $-35$  °C. The reaction was allowed to warm up to r.t. over the next 2 h. Then it was quenched with water (2 mL), washed and dried under vacuum.

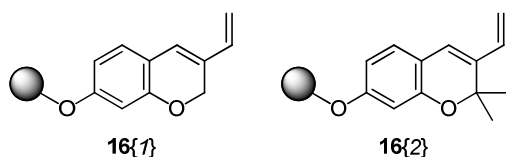

**16{1}:**

$^{13}\text{C}$  NMR (100 MHz,  $\text{CDCl}_3$ ):  $\delta$  = 17.4, 27.1, 29.4, 65.4, 68.7, 72.8, 95.9, 103.8, 109.9, 112.0, 115.7, 154.8, 158.1.

Raman:  $\nu$  = 3056, 3003, 2977, 2906, 2855, 1633, 1603, 1584, 1450, 1271, 1182, 1032, 1002.

### 16{2}:

$^{13}\text{C}$  NMR (100 MHz,  $\text{CDCl}_3$ ):  $\delta$  = 17.5, 26.6 (2C), 27.2, 29.5, 68.6, 70.12, 73.1, 95.9, 104.2, 109.2, 114.6, 118.6, 158.2.

Raman:  $\nu$  = 3054, 3003, 2977, 2905, 2854, 1604, 1584, 1568, 1451, 1183, 1032, 1002.

### General Procedure for the Wittig reaction (Solution Phase):

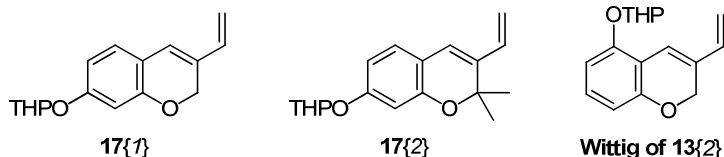

Methyl triphenylphosphonium bromide (714 mg, 2.00 mmol) was suspended in dry THF (6 mL) under nitrogen and cooled to  $-20\text{ }^{\circ}\text{C}$ . *n*-BuLi (1.25 mL, 1.6 M solution in hexane, 2.0 mmol) was added and the mixture stirred for 1 h ( $-20\text{ }^{\circ}\text{C}$  up to  $0\text{ }^{\circ}\text{C}$ ). Afterwards, the carbaldehyde (0.85 mmol) was added at  $-20\text{ }^{\circ}\text{C}$  in 5 mL of THF. The reaction was allowed to warm up to r.t. over the next hour, before being quenched with water (0.5 mL). A saturated aqueous solution of  $\text{NH}_4\text{Cl}$  (15 mL) and EtOAc (15 mL) were added, the aqueous layer separated and extracted with EtOAc ( $2 \times 10\text{ mL}$ ). The combined organic layers were dried, concentrated under reduced pressure and purified by flash chromatography. The products undergo dimerization on silica gel and/or refrigerated.

### 7-[(Tetrahydro-2H-pyran-2-yl)oxy]-3-vinyl-2H-chromene 17{1}:

Flash chromatography in cyclohexane/EtOAc (12:1).  $R_f$  = 0.41. Yield: 80%. Colorless oil.

IR (KBr):  $\nu$  = 3392, 2947, 2871, 2874, 1726, 1616, 1501, 1440, 1356, 1270, 1203, 1161, 1104, 1076, 1021.

$^1\text{H}$  NMR (250 MHz,  $\text{CDCl}_3$ ):  $\delta$  = 1.56–2.10 (m, 6H,  $3\text{CH}_2$ ), 3.57–3.65 (m, 1H,  $\text{OCH}_2$ ), 3.89 (ddd,  $J$  = 11.5, 9.0, 3.2 Hz, 1H,  $\text{OCH}_2$ ), 4.94 (s, 2H,  $\text{OCH}_2$ ), 4.97 (d,  $J$  = 17.8 Hz, 1H,  $=\text{CH}_2$ ), 5.11 (d,  $J$  = 11.1

Hz, 1H, =CH<sub>2</sub>), 5.38 (t, *J* = 3.3 Hz, 1H, OCHO), 6.35 (s, 1H, CH=), 6.42 (dd, *J* = 17.8, 11.1 Hz, 1H, =CH), 6.56 (s, 1H, Ar<sub>m</sub>-H), 6.56–6.62 (m, 1H, Ar<sub>m</sub>-H), 6.88–6.98 (m, 1H, Ar<sub>m</sub>-H).

<sup>13</sup>C NMR (100 MHz, CDCl<sub>3</sub>): δ = 18.8, 25.1, 30.2, 62.1, 65.3, 96.3, 104.0, 109.6, 112.2, 116.5, 123.5, 127.5, 128.3, 134.8, 154.8, 158.1.

MS (FAB<sup>+</sup>): *m/z* (%) = 175 (17) [C<sub>11</sub>H<sub>11</sub>O<sub>2</sub><sup>+</sup>], 174 (40) [MH<sup>+</sup>-THP; C<sub>11</sub>H<sub>10</sub>O<sub>2</sub><sup>+</sup>], 173 (29), 85 (THP, 100).

### **2,2-Dimethyl-7-[(tetrahydro-2*H*-pyran-2-yl)oxy]-3-vinyl-2*H*-chromene 17{2}:**

Flash chromatography in cyclohexane/EtOAc (10:1). *R*<sub>f</sub> = 0.50. Yield: 87%. Colorless oil.

<sup>1</sup>H NMR (250 MHz, acetone-*d*<sub>6</sub>): δ = 1.46 (s, 6H, 2CH<sub>3</sub>), 1.52–2.00 (m, 6H, 3CH<sub>2</sub>), 3.46–3.64 (m, 1H, OCH<sub>2</sub>), 3.77–3.90 (m, 1H, OCH<sub>2</sub>), 5.10 (dd, *J* = 11.0, 1.4 Hz, 1H, =CH<sub>2</sub>), 5.40 (t, *J* = 2.9 Hz, OCHO), 5.53 (dd, *J* = 17.3, 1.4 Hz, 1H, =CH<sub>2</sub>), 6.43 (ddd, *J* = 17.3, 11.0, 1.4 Hz, 1H, CH=), 6.47 (d, *J* = 2.3 Hz, 1H, Ar<sub>m</sub>-H), 6.51 (s, 1H, =CH), 6.54 (dd, *J* = 8.3, 2.3 Hz, 1H, Ar<sub>m</sub>-H), 6.97 (d, *J* = 8.3 Hz, 1H, Ar<sub>m</sub>-H).

### **5-[(Tetrahydro-2*H*-pyran-2-yl)oxy]-3-vinyl-2*H*-chromene (Wittig of 13{2}):**

Flash chromatography in cyclohexane/EtOAc (20:1); *R*<sub>f</sub> = 0.50. Yield: 74%. Colorless oil.

<sup>1</sup>H NMR (250 MHz, acetone-*d*<sub>6</sub>): δ = 1.52–2.10 (m, 6H, 3CH<sub>2</sub>), 3.51–3.64 (m, 1H, OCH<sub>2</sub>), 3.82 (ddd, *J* = 11.5, 9.1, 3.4 Hz, 1H, OCH<sub>2</sub>), 4.92 (s, 2H, OCH<sub>2</sub>), 5.17 (d, *J* = 11.0 Hz, 1H, =CH<sub>2</sub>), 5.23 (d, *J* = 11.0 Hz, 1H, =CH<sub>2</sub>), 5.47 (t, *J* = 2.4 Hz, 1H, OCHO), 6.45 (d, *J* = 8.3 Hz, 1H, Ar<sub>m</sub>-H), 6.57 (dd, *J* = 17.8, 11.0 Hz, 1H, =CH), 6.70 (d, *J* = 8.3 Hz, 1H, Ar<sub>m</sub>-H), 6.83 (s, 1H, CH=), 7.04 (t, *J* = 8.3 Hz, 1H, Ar<sub>m</sub>-H).

<sup>13</sup>C NMR (50 MHz, acetone-*d*<sub>6</sub>): δ = 19.8, 26.2, 31.8, 63.0, 65.9, 97.8, 109.2, 110.0, 114.1, 120.0, 130.5, 136.3. Determined via CH-COSY, no quaternary Cs.

MS (EI, 70 eV): *m/z* (%) = 258 (16) [M<sup>+</sup>], 174 (100), 153 (40), 136 (21), 107 (33), 89 (28), 77 (53).

HRMS–EI *m/z* [M<sup>+</sup>] calcd for C<sub>16</sub>H<sub>18</sub>O<sub>3</sub>: 258.1256; found: 258.1257.

### **Procedure for the Enol-Ether Formation (Solid Phase):**

The resin (2.50 g) was solvated in anhydrous  $\text{CH}_2\text{Cl}_2$  (25 mL) and degassed with nitrogen for 5 min.  $\text{Et}_3\text{N}$  (2.08 mL, 1.52 g, 15.0 mmol) was added, followed by TBSOTf (1.70 mL, 1.98 g, 7.50 mmol) at  $-30\text{ }^\circ\text{C}$ . Afterwards, the reaction was agitated for 16 h, in which the temperature was allowed to rise to r.t. The resin was filtered and washed as described above.

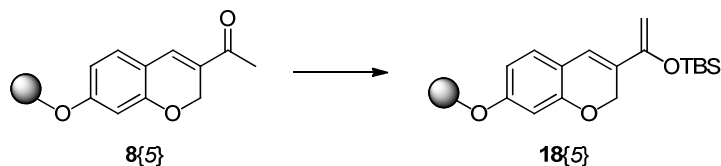

#### **18{5}:**

Raman:  $\nu = 3055, 3002, 2903, 2857, 1604, 1584, 1448, 1203, 1183, 1156, 1032, 1003$ .

#### **Procedure for the Enol-Ether Formation (Solution Phase):**

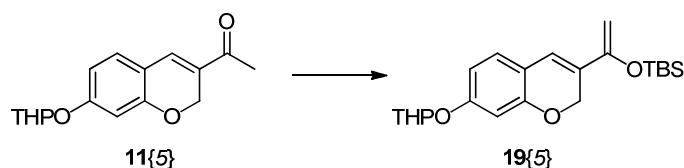

To a solution of ketone **11{5}** (274 mg, 1.00 mmol) and  $\text{Et}_3\text{N}$  (304 mg, 0.42 mL, 3.00 mmol) in anhydrous  $\text{CH}_2\text{Cl}_2$  under nitrogen atmosphere was added TBSOTf (396 mg, 0.34 mL, 1.50 mmol) at  $0\text{ }^\circ\text{C}$ . The reaction was stirred and allowed to warm up to r.t. over the next 3 h. Afterwards, it was diluted with  $\text{Et}_2\text{O}$  (10 mL) and a saturated solution of  $\text{NaHCO}_3$  (15 mL). The organic layer was separated and the aqueous one extracted three times with  $\text{Et}_2\text{O}$  (15 mL). The combined organic layers were dried, concentrated and rapidly purified by flash chromatography, as decomposition could be observed on silica gel [cyclohexane/ $\text{EtOAc}$  (20:1),  $R_f = 0.50$ ] to give 283 mg (73%) of a colorless oil.

#### **19{5}:**

IR (KBr)  $\nu = 2952, 2857, 1614, 1570, 1501, 1462, 1345, 1320, 1288, 1256, 1203, 1162, 1142, 1123, 1109, 1077, 1023$ .

$^1\text{H}$  NMR (250 MHz, acetone- $d_6$ ):  $\delta = 0.24$  (s, 6H,  $2\text{CH}_3$ ),  $1.03$  (s, 9H,  $3\text{CH}_3$ ),  $1.50\text{--}2.02$  (m, 6H,  $3\text{CH}_2$ ),  $3.63\text{--}3.51$  (m, 1H,  $\text{OCH}_2$ ),  $3.82$  (ddd,  $J = 11.1, 8.8, 3.0$  Hz, 1H,  $\text{OCH}_2$ ),  $4.39\text{--}4.45$  (m, 2H,  $=\text{CH}_2$ ),  $4.87$  (s, 2H,  $\text{OCH}_2$ ),  $5.41$  (br. s, 1H,  $\text{OCHO}$ ),  $6.53$  (bs, 1H,  $\text{Ar}_m\text{-H}$ ),  $6.59$  (dd,  $J = 8.3, 2.2$  Hz, 1H,  $\text{Ar}_m\text{-H}$ ),  $6.81$  (s, 1H,  $=\text{CH}$ ),  $7.02$  (d,  $J = 8.3$  Hz, 1H,  $\text{Ar}_m\text{-H}$ ).

$^{13}\text{C}$  NMR (100 MHz,  $\text{CDCl}_3$ ):  $\delta = -3.4$  (2C), 19.9, 26.9, 27.2 (3C), 31.9, 63.3, 66.9, 93.6, 97.9, 105.5, 111.6, 117.9, 121.9, 128.2, 129.9, 154.3, 154.3, 156.6, 160.3.

MS (EI, 70 eV):  $m/z$  (%) = 388 (7) [ $\text{M}^+$ ], 248 (43), 233 (25), 205 (19), 147 (21), 85 (100), 75 (45), 57 (33).

HRMS–EI:  $m/z$  [ $\text{M}^+$ ] calcd for  $\text{C}_{22}\text{H}_{32}\text{O}_4\text{Si}$ : 388.2070; found: 388.2068.

### General Procedure for the Diels-Alder Reaction (Solid Phase):

The resin (500 mg) was dried overnight at 90 °C. It was suspended in toluene (5 mL) in a vial and nitrogen was bubbled through for 10 min. The dienophile (5.00 mmol) was added, the vial closed and the reaction agitated at 80 °C for 2 days. The resin was filtered, washed and dried under vacuum to be immediately cleaved.

### 1-(3-Hydroxy-8,9,10,10a-tetrahydro-6H-benzo[c]chromen-10-yl)ethanone (**21**{*I*,*I*}):

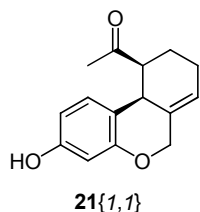

Yield for Wittig, Diels-Alder and cleavage: 95%. *Endo/Exo* = 4:1.

Flash chromatography in cyclohexane/EtOAc (2:1).

*Exo*-Isomer:  $R_f = 0.20$

$^1\text{H}$  NMR (250 MHz, acetone- $d_6$ ):  $\delta = 2.00$ – $2.24$  (m, 4H,  $2\text{CH}_2$ ), 2.35 (s, 3H,  $\text{CH}_3$ ), 2.75 (ddd,  $J = 12.0$ , 9.2, 2.7 Hz, 1H, CH), 3.97 (bdd,  $J = 9.2$ , 2.3 Hz, 1H, CH), 4.38–4.50 (m, 2H,  $\text{OCH}_2$ ), 5.89 (bd,  $J = 2.6$  Hz, 1H,  $\text{CH}=\text{)$ , 6.21 (d,  $J = 2.5$  Hz, 1H,  $\text{Ar}_m\text{-H}$ ), 6.32 (dd,  $J = 8.6$ , 2.5 Hz, 1H,  $\text{Ar}_m\text{-H}$ ), 6.63 (dd,  $J = 8.6$ , 1.0 Hz, 1H,  $\text{Ar}_m\text{-H}$ ), 8.17 (s, 1H, OH).

$^{13}\text{C}$  NMR (100 MHz, acetone- $d_6$ ):  $\delta = 26.4$ , 28.1, 37.4, 55.5, 72.2, 105.1, 110.2, 118.6, 125.8, 130.0, 133.8, 157.7, 158.6, 213.0.

MS (EI, 70 eV):  $m/z$  (%) = 244 (48) [ $\text{M}^+$ ], 201 (43) [ $\text{C}_{13}\text{H}_{13}\text{O}_2^+$ ], 173 (23), 89 (14), 58 (20), 43 (100).

HRMS–EI:  $m/z$  [ $\text{M}^+$ ] calcd for  $\text{C}_{15}\text{H}_{16}\text{O}_3$ : 244.1099; found: 244.1098.

*Endo*-Isomer:  $R_f = 0.15$

$^1\text{H}$  NMR (250 MHz, acetone- $d_6$ ):  $\delta$  = 1.84 (s, 3H,  $\text{CH}_3$ ), 1.93–2.22 (m, 4H,  $2\text{CH}_2$ ), 3.63–3.55 (m, 1H, CH), 3.73–3.82 (m, 1H, CH), 4.40 (s, 2H,  $\text{OCH}_2$ ), 5.67–5.74 (m, 1H,  $\text{CH=}$ ), 6.24 (d,  $J$  = 2.5 Hz, 1H,  $\text{Ar}_m\text{-H}$ ), 6.39 (dd,  $J$  = 8.4, 2.5 Hz, 1H,  $\text{Ar}_m\text{-H}$ ), 7.02 (d,  $J$  = 8.4 Hz, 1H,  $\text{Ar}_m\text{-H}$ ), 8.13 (s, 1H, OH).

$^{13}\text{C}$  NMR (100 MHz, acetone- $d_6$ ):  $\delta$  = 23.6, 26.5, 37.7, 51.5, 71.9, 105.2, 110.6, 118.2, 124.7, 129.4, 133.0, 158.1, 158.5, 209.1.

MS ( $\text{ESI}^-$ ):  $m/z$  (%) = 275 (100) [ $\text{MH}^- + \text{MeOH}$ ], 261 (47) [ $\text{MH}^- + \text{NH}_4^+$ ], 243 (34) [ $\text{MH}^-$ ], 175 (50).

**Methyl 3-hydroxy-8,9,10,10a-tetrahydro-6H-benzo[*c*]chromene-10-carboxylate (**21**{*I*,*2*}):**

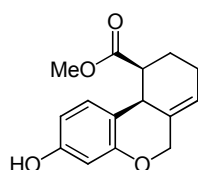

**21**{*I*,*2*}

Yield for Wittig, Diels-Alder and cleavage: 90%. *Endo/Exo* = 2:1.

Flash chromatography in cyclohexane/EtOAc (2:1).

*Exo*-Isomer:  $R_f$  = 0.62 (1:1)

$^1\text{H}$  NMR (250 MHz, acetone- $d_6$ ):  $\delta$  = 1.66–2.24 (m, 4H,  $\text{CH}_2$ ), 2.46 (ddd,  $J$  = 12.3, 9.5, 3.0 Hz, 1H, CH), 3.78 (s, 3H,  $\text{OCH}_3$ ), 3.84–3.94 (m, 1H, CH), 4.43 (s, 2H,  $\text{OCH}_2$ ), 5.86–5.94 (m, 1H,  $\text{CH=}$ ), 6.22 (d,  $J$  = 2.6 Hz, 1H,  $\text{Ar}_m\text{-H}$ ), 6.35 (dd,  $J$  = 8.5, 2.6 Hz, 1H,  $\text{Ar}_m\text{-H}$ ), 6.77 (dd,  $J$  = 8.5, 0.9 Hz, 1H,  $\text{Ar}_m\text{-H}$ ), 8.22 (s, 1H, OH).

$^{13}\text{C}$  NMR (125 MHz, acetone- $d_6$ ):  $\delta$  = 26.0, 28.8, 38.4, 48.7, 53.3, 72.1, 105.2, 110.4, 118.3, 126.1, 129.7, 133.4, 157.8, 158.7, 178.5.

MS ( $\text{FAB}^+$ ):  $m/z$  (%) = 260 (76) [ $\text{M}^+$ ,  $\text{C}_{15}\text{H}_{16}\text{O}_4^+$ ], 229 (22), 213 (29), 201 (60) [ $\text{C}_{13}\text{H}_{13}\text{O}_2^+$ ], 199 (61) [ $\text{C}_{13}\text{H}_{11}\text{O}_2^+$ ], 185 (29) [ $\text{C}_{13}\text{H}_{13}\text{O}^+$ ], 173 (49), 161 (37), 149 (50), 133 (75), 105 (62), 91 (100).

*Endo*-Isomer:  $R_f$  = 0.52 (1:1)

$^1\text{H}$  NMR (250 MHz, acetone- $d_6$ ):  $\delta$  = 1.90–2.20 (m, 4H,  $2\text{CH}_2$ ), 3.35 (s, 3H,  $\text{OCH}_3$ ), 3.50 (td,  $J$  = 5.8, 3.7 Hz, 1H, CH), 3.80–3.73 (m, 1H, CH), 4.38 (s, 2H,  $\text{OCH}_2$ ), 5.70–5.76 (m, 1H,  $\text{CH=}$ ), 6.22 (d,  $J$  = 2.5 Hz, 1H,  $\text{Ar}_m\text{-H}$ ), 6.35 (dd,  $J$  = 8.4, 2.5 Hz, 1H,  $\text{Ar}_m\text{-H}$ ), 7.01 (d,  $J$  = 8.4 Hz, 1H,  $\text{Ar}_m\text{-H}$ ), 8.09 (s, 1H, OH).

$^{13}\text{C}$  NMR (125 MHz, acetone- $d_6$ ):  $\delta$  = 23.7, 26.6, 37.7, 44.3, 52.1, 71.8, 105.1, 110.2, 117.8, 124.8, 129.4, 132.4, 158.1, 158.5, 173.8.

MS (FAB $^+$ ):  $m/z$  (%) = 260 (24) [ $\text{M}^+$ ,  $\text{C}_{15}\text{H}_{16}\text{O}_4^+$ ], 255 (16), 201 (12) [ $\text{C}_{13}\text{H}_{13}\text{O}_2^+$ ], 123 (45), 107 (48), 95 (60), 81 (66).

**3-Hydroxy-8,9,10,10a-tetrahydro-6H-benzo[c]chromene-10-carbonitrile (21{1,3}):**

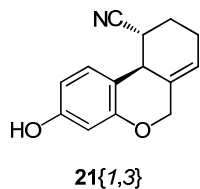

Yield for Wittig, Diels-Alder and cleavage: 90%. *Endo/Exo* = 4:5.

Flash chromatography in cyclohexane/EtOAc (3:1).

*Exo*-Isomer:  $R_f$  = 0.31

$^1\text{H}$  NMR (500 MHz, acetone- $d_6$ ):  $\delta$  = 1.95–2.03 (m, 1H,  $\text{CH}_2$ ), 2.17–2.27 (m, 3H,  $\text{CH}_2$ ), 2.80 (ddd,  $J$  = 12.1, 9.6, 2.8 Hz, 1H, NC-CH), 3.82 (bqd,  $J$  = 9.6, 2.8 Hz, 1H, CH), 4.42 (s, 2H,  $\text{OCH}_2$ ), 5.94 (br. q,  $J$  = 2.8 Hz, 1H, =CH), 6.26 (d,  $J$  = 2.6 Hz, 1H,  $\text{Ar}_m\text{-H}$ ), 6.47 (dd,  $J$  = 8.6, 2.6 Hz, 1H,  $\text{Ar}_m\text{-H}$ ), 7.62 (d,  $J$  = 8.6 Hz, 1H,  $\text{Ar}_m\text{-H}$ ), 8.34 (s, 1H, OH).

$^{13}\text{C}$  NMR (125 MHz, acetone- $d_6$ ):  $\delta$  = 25.2, 28.5, 33.7, 39.0, 72.0, 105.3, 110.6, 116.9, 125.2, 126.8, 129.8, 132.6, 158.0, 159.3.

MS (EI, 70 eV):  $m/z$  (%) = 166 (17), 143 (24), 128 (13), 109 (100). No  $\text{M}^+$ .

*Endo*-Isomer:  $R_f$  = 0.15.

$^1\text{H}$  NMR (500 MHz, acetone- $d_6$ ):  $\delta$  = 1.96–2.04 (m, 1H,  $\text{CH}_2$ ), 2.15–2.30 (m, 2H,  $\text{CH}_2$ ), 2.35–2.45 (m, 1H,  $\text{CH}_2$ ), 3.79–3.82 (m, 1H, NC-CH), 3.84–3.88 (m, 1H, CH), 4.40 (AB-sys.,  $J$  = 11.7 Hz, 2 H,  $\text{OCH}_2$ ), 5.91 (bd,  $J$  = 1.9 Hz, 1H, =CH), 6.28 (d,  $J$  = 2.5 Hz, 1H,  $\text{Ar}_m\text{-H}$ ), 6.48 (dd,  $J$  = 8.4, 2.5 Hz, 1H,  $\text{Ar}_m\text{-H}$ ), 7.17 (d,  $J$  = 8.4 Hz, 1H,  $\text{Ar}_m\text{-H}$ ), 8.30 (s, 1H, OH).

$^{13}\text{C}$  NMR (125 MHz, acetone- $d_6$ ):  $\delta$  = 22.5, 25.2, 32.2, 37.3, 70.3, 104.3, 110.1, 114.5, 120.2, 125.2, 129.5, 131.1, 157.5, 158.0.

MS (EI, 70 eV):  $m/z$  (%) = 227 (2) [ $\text{M}^+$ ], 149 (12), 109 (51), 66 (68), 65 (56), 46 (100).

HRMS–EI:  $m/z$  [ $M^+$ ] calcd for  $C_{14}H_{13}NO_2$ : 227.0946; found: 227.0945.

**1-(3-Hydroxy-6,6-dimethyl-8,9,10,10a-tetrahydro-6H-benzo[*c*]chromen-10-yl)ethanone (21{2,1}):**

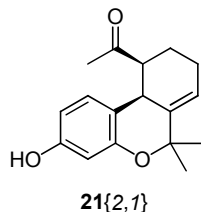

Yield for Wittig, Diels-Alder and cleavage: 50%. *Endo/Exo* = 7:10.

Flash chromatography in cyclohexane/EtOAc (4:1).

*Exo*-Isomer:  $R_f$  = 0.52 (2:1)

$^1H$  NMR (500 MHz, acetone- $d_6$ ):  $\delta$  = 1.41 (s, 3H,  $CH_3$ ), 1.42 (s, 3H,  $CH_3$ ), 2.02–2.18 (m, 4H, 2 $CH_2$ ), 2.37 (s, 3H,  $CH_3$ ), 2.89 (ddd,  $J$  = 11.9, 8.8, 3.0 Hz, 1H, CH), 3.92 (qd,  $J$  = 8.8, 2.5 Hz, 1H, CH), 5.74–5.78 (m, 1H, CH=), 6.25 (d,  $J$  = 2.5 Hz, 1H,  $Ar_m$ -H), 6.34 (dd,  $J$  = 8.4, 2.5 Hz, 1H,  $Ar_m$ -H), 6.64 (dd,  $J$  = 8.4, 1.1 Hz, 1H,  $Ar_m$ -H), 8.12 (s, 1H, OH).

$^{13}C$  NMR (100 MHz, acetone- $d_6$ ):  $\delta$  = 26.3, 27.5, 28.5, 30.0, 30.1, 35.3, 54.2, 79.4, 106.0, 110.0, 119.5, 120.8, 128.5, 141.3, 156.6, 158.7, 212.4.

MS (EI, 70 eV):  $m/z$  (%) = 272 (29) [ $M^+$ ], 257 (100), 215 (35), 187 (21), 109 (21), 65 (26), 59 (24), 46 (38), 43 (87).

HRMS–EI:  $m/z$  [ $M^+$ ] calcd for  $C_{17}H_{20}O_3$ : 272.1412; found: 272.1414.

*Endo*-Isomer:  $R_f$  = 0.45 (2:1). Not stable, decomposition and isomerization to *exo*-diastereomer.

$^1H$  NMR (250 MHz, acetone- $d_6$ ):  $\delta$  = 1.31 (s, 3H,  $CH_3$ ), 1.49 (s, 3H,  $CH_3$ ), 1.83 (s, 3H,  $CH_3$ ), 1.95–2.20 (m, 4H, 2 $CH_2$ ), 3.52–3.62 (m, 1H, CH), 3.73–3.83 (m, 1H, CH), 5.69 (bd,  $J$  = 2.6 Hz, 1H, CH=), 6.24 (d,  $J$  = 2.4 Hz, 1H,  $Ar_m$ -H), 6.36 (dd,  $J$  = 8.3, 2.4 Hz, 1H,  $Ar_m$ -H), 6.99 (d,  $J$  = 8.3 Hz, 1H,  $Ar_m$ -H), 8.11 (s, 1H, OH).

MS (EI, 70 eV):  $m/z$  (%) = 272 (1) [ $M^+$ ], 257 (1), 101 (9), 64 (30), 58 (35), 46 (100), 43 (100).

HRMS–EI:  $m/z$  [ $M^+$ ] calcd for  $C_{17}H_{20}O_3$ : 272.1412; found: 272.1414.



**Methyl 3-hydroxy-6,6-dimethyl-8,9,10,10a-tetrahydro-6H-benzo[c]chromene-10-carboxylate (21{2,2}):**

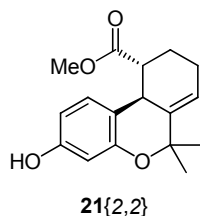

Yield for Wittig, Diels-Alder and cleavage: 35%. *Endo/Exo* = 1:1.

Flash chromatography in cyclohexane/EtOAc (3:1).

*Exo*-Isomer:  $R_f = 0.24$

$^1\text{H}$  NMR (400 MHz, acetone- $d_6$ ):  $\delta$  = 1.40 (s, 3H, CH<sub>3</sub>), 1.41 (s, 3H, CH<sub>3</sub>), 1.65–1.76 (m, 1H, CH<sub>2</sub>), 1.94–2.02 (m, 1H, CH<sub>2</sub>), 2.12–2.19 (m, 2H, CH<sub>2</sub>), 2.64 (ddd,  $J$  = 12.1, 9.2, 3.1 Hz, 1H, CH), 3.77 (s, 3H, OCH<sub>3</sub>), 3.79–3.84 (m, 1H, CH), 5.77 (td,  $J$  = 4.7, 2.7 Hz, 1H, CH=), 6.26 (d,  $J$  = 2.6 Hz, 1H, Ar<sub>m</sub>-H), 6.37 (dd,  $J$  = 8.5, 2.6 Hz, 1H, Ar<sub>m</sub>-H), 6.79 (d,  $J$  = 8.5 Hz, 1H, Ar<sub>m</sub>-H), 8.21 (bs, 1H, OH).

$^{13}\text{C}$  NMR (125 MHz, acetone- $d_6$ ):  $\delta$  = 25.9, 28.1, 28.5, 28.9, 36.4, 47.2, 53.3, 79.5, 106.1, 110.2, 119.3, 121.1, 128.0, 140.8, 156.6, 158.9, 178.3.

MS (EI, 70 eV):  $m/z$  (%) = 288 (3) [ $\text{M}^+$ ], 273 (18), 101 (9), 64 (22), 58 (35), 46 (70), 43 (100).

HRMS–EI:  $m/z$  [ $\text{M}^+$ ] calcd for C<sub>17</sub>H<sub>20</sub>O<sub>4</sub>: 288.1362; found: 288.1366.

*Endo*-Isomer:  $R_f = 0.19$ . Not stable. Decomposition after a few hours in solution.

$^1\text{H}$  NMR (250 MHz, acetone- $d_6$ ):  $\delta$  = 1.30 (s, 3H, CH<sub>3</sub>), 1.47 (s, 3H, CH<sub>3</sub>), 1.86–2.20 (m, 4H, 2CH<sub>2</sub>), 3.38 (s, 3H, OCH<sub>3</sub>), 3.54 (td,  $J$  = 5.5, 4.0 Hz, 1H, CH), 3.55–3.85 (m, 1H, CH, exact location due to impurities not detected), 5.69 (d,  $J$  = 3.1 Hz, 1H, CH=), 6.21 (d,  $J$  = 2.5 Hz, 1H, Ar<sub>m</sub>-H), 6.34 (dd,  $J$  = 8.4, 2.5 Hz, 1H, Ar<sub>m</sub>-H), 6.98 (d,  $J$  = 8.4 Hz, 1H, Ar<sub>m</sub>-H), 8.07 (s, 1H, OH).

**3-Hydroxy-6,6-dimethyl-8,9,10,10a-tetrahydro-6H-benzo[c]chromene-10-carbonitrile (21{2,3}):**

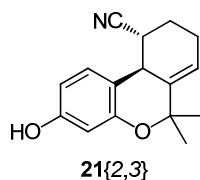

Yield for Wittig, Diels-Alder and cleavage: 50%. *Endo/Exo* = 1:10.

Flash chromatography in cyclohexane/EtOAc (4:1).

*Exo*-Isomer:  $R_f = 0.24$

IR (ATR, platinum)  $\nu = 3329, 2978, 2937, 2248, 1622, 1589, 1506, 1456, 1310, 1296, 1160, 1139, 1121$ .

$^1\text{H}$  NMR (250 MHz, acetone- $d_6$ ):  $\delta = 1.39$  (s, 3H,  $\text{CH}_3$ ), 1.43 (s, 3H,  $\text{CH}_3$ ), 1.84–2.01 (m, 1H,  $\text{CH}_2$ ), 2.08–2.27 (m, 3H,  $\text{CH}_2$ ), 3.00 (ddd,  $J = 11.5, 9.1, 3.1$  Hz, 1H, NC-CH), 3.73 (bdd,  $J = 9.1, 2.2$  Hz, 1H, CH), 5.80–5.88 (m, 1H, =CH), 6.28 (d,  $J = 2.5$  Hz, 1H,  $\text{Ar}_m\text{-H}$ ), 6.47 (dd,  $J = 8.5, 2.5$  Hz, 1H,  $\text{Ar}_m\text{-H}$ ), 7.51 (d,  $J = 8.5$  Hz, 1H,  $\text{Ar}_m\text{-H}$ ), 8.32 (s, 1H, OH).

$^{13}\text{C}$  NMR (125 MHz, acetone- $d_6$ ):  $\delta = 25.0, 27.6, 28.28, 28.34, 32.4, 37.3, 79.2, 106.2, 110.3, 117.7, 121.7, 125.1, 128.2, 139.6, 156.6, 159.4$ .

MS (EI, 70 eV):  $m/z$  (%) = 255 (43) [ $\text{M}^+$ ], 187 (100), 174 (27), 173 (29).

HRMS–EI:  $m/z$  [ $\text{M}^+$ ] calcd for  $\text{C}_{16}\text{H}_{17}\text{NO}_2$ : 255.1259; found: 255.1258.

**1-(3-Hydroxy-6,6-dimethyl-8,9,10,10a-tetrahydro-6H-benzo[*c*]chromen-10-yl)propan-1-one**  
**(21{2,4}):**

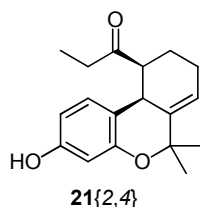

Yield for Wittig, Diels-Alder and cleavage: 70%. *Endo/Exo* = 8:5.

Flash chromatography in cyclohexane/EtOAc (4:1).

*Exo*-Isomer:  $R_f = 0.26$

$^1\text{H}$  NMR (250 MHz, acetone- $d_6$ ):  $\delta = 1.09$  (t,  $J = 7.2$  Hz, 3H,  $\text{CH}_3$ ), 1.39 (s, 3H,  $\text{CH}_3$ ), 1.42 (s, 3H,  $\text{CH}_3$ ), 2.10–2.20 (m, 2H,  $\text{CH}_2$ ), 2.40–2.90 (m, 4H, 2 $\text{CH}_2$ ), 3.59–3.65 (m, 1H, CH), 3.92–4.00 (m, 1H, CH), 5.74–5.80 (m, 1H, =CH), 6.24 (d,  $J = 2.5$  Hz, 1H,  $\text{Ar}_m\text{-H}$ ), 6.33 (dd,  $J = 8.5, 2.5$  Hz, 1H,  $\text{Ar}_m\text{-H}$ ), 6.60 (d,  $J = 8.5$  Hz, 1H,  $\text{Ar}_m\text{-H}$ ), 8.15 (s, 1H, OH).

MS (EI, 70 eV):  $m/z$  (%) = 286 (12) [ $\text{M}^+$ ], 271 (46) [ $\text{C}_{17}\text{H}_{19}\text{O}_2$ ], 201 (20), 161 (14), 153 (13), 109 (12), 101 (25), 98 (17), 83 (100).

HRMS–EI:  $m/z$  [ $M^+$ ] calcd for  $C_{18}H_{22}O_3$ : 286.1569; found: 286.1567.

*Endo*-Isomer:  $R_f$  = 0.22

$^1H$  NMR (250 MHz, acetone- $d_6$ ):  $\delta$  = 0.74 (t,  $J$  = 7.3 Hz, 3H,  $CH_3$ ), 1.30 (s, 3H,  $CH_3$ ), 1.49 (s, 3H,  $CH_3$ ), 1.90–2.20 (m, 6H, 3 $CH_2$ ), 3.56–3.66 (m, 1H, CH), 3.70–3.80 (m, 1H, CH), 5.64–5.70 (m, 1H, =CH), 6.24 (d,  $J$  = 2.9 Hz, 1H,  $Ar_m$ -H), 6.34 (dd,  $J$  = 8.4, 2.9 Hz, 1H,  $Ar_m$ -H), 6.97 (d,  $J$  = 8.4 Hz, 1H,  $Ar_m$ -H), 8.15 (s, 1H, OH).

**Dimethyl 3-hydroxy-6,6-dimethyl-8,9,10,10a-tetrahydro-6H-benzo[c]chromene-9,10-dicarboxylate (21{2,5}):**

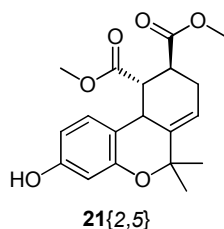

Yield for Wittig, Diels-Alder and cleavage: 32%. *Endo/Exo* = 1:1.

Flash chromatography in cyclohexane/EtOAc (3:1). *Exo*-Isomer and *Endo*-Isomer:  $R_f$  = 0.21. Not separable.

$^1H$  NMR (500 MHz, acetone- $d_6$ ):  $\delta$  = 1.27 (s, 3H,  $CH_3$ ), 1.40 (s, 3H,  $CH_3$ ), 1.42 (s, 3H,  $CH_3$ ), 1.46 (s, 3H,  $CH_3$ ), 2.31–2.46 (m, 3H,  $CH_2$ ), 2.51–2.58 (m, 1H,  $CH_2$ ), 2.80 (dd,  $J$  = 11.4, 9.5 Hz, 1H, CH), 2.85 (dd,  $J$  = 10.7, 5.3 Hz, 1H, CH), 3.16 (tt,  $J$  = 3.8, 3.1 Hz, 1H, CH), 3.42 (s, 3H,  $OCH_3$ ), 3.65 (s, 3H,  $OCH_3$ ), 3.67–3.71 (m, 1H, CH), 3.72 (s, 3H,  $OCH_3$ ), 3.74 (s, 3H,  $OCH_3$ ), 3.81 (dd,  $J$  = 5.3, 3.4 Hz, 1H, CH), 3.83–3.88 (m, 1H, CH), 5.66 (tt,  $J$  = 4.3, 3.1 Hz, 1H, =CH)+5.78 (tt,  $J$  = 5.3, 2.5 Hz, 1H, =CH), 6.24+6.28 (d,  $J$  = 2.5 Hz, 1H,  $Ar_m$ -H), 6.37+6.40 (dd,  $J$  = 8.5, 2.5 Hz, 1H,  $Ar_m$ -H), 6.88+6.97 (dd,  $J$  = 8.5, 0.9 Hz, 1H,  $Ar_m$ -H), 8.11+8.25 (s, 1H, OH).

$^{13}C$  NMR (125 MHz, acetone- $d_6$ ):  $\delta$  = 27.69, 27.73, 28.5, 28.9, 26.1+29.1, 33.1+37.7, 41.0, 45.0, 46.0, 49.9, 52.7, 53.2, 53.4, 78.4+79.5, 105.9+106.4, 110.0+110.4, 117.6+118.6, 118.5+119.3, 128.0+128.3, 139.0+141.2, 156.5+156.7, 158.5+159.1, 173.3, 175.3, 176.7.

MS (EI, 70 eV):  $m/z$  (%) = 346 (27) [ $M^+$ ], 331 [ $M^+$ – $CH_3$ ] (99), 271 (100), 187 (23), 109 (30), 65 (53), 46 (98).

HRMS–EI:  $m/z$  [ $M^+$ ] calcd for  $C_{19}H_{22}O_6$ : 346.1416; found: 346.1419.

**Ethyl 10-formyl-3-hydroxy-6,6-dimethyl-8,9,10,10a-tetrahydro-6H-benzo[c]chromene-9-carboxylate (21{2,6}):**

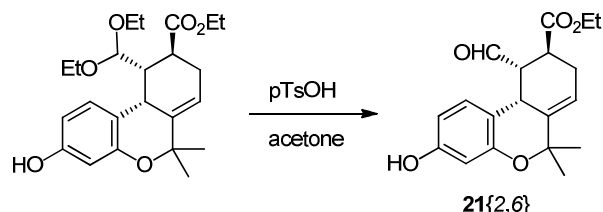

100 mg (approx. 0.29 mmol) of the crude cleaved product were dissolved in 10 mL of acetone. *p*-TsOH•H<sub>2</sub>O (40 mg, 0.21 mmol) was added and the mixture was stirred for 2 h at r.t. The solvent was removed under reduced pressure and the residue dissolved in EtOAc (10 mL) and water (10 mL). The organic layer was separated and the aqueous one extracted twice with EtOAc (10 mL). The combined organic layers were dried (MgSO<sub>4</sub>), concentrated, and purified by flash chromatography [cyclohexane/EtOAc (4:1)].

Yield: 29%. *Endo/Exo* = 5:4. After Wittig, Diels-Alder, cleavage and acetal deprotection, based on isolated yield of *endo*-diastereomer and calculated *exo*-diastereomer according to their ratio after cleavage (losses on chromatography).

*Endo*-Isomer: *R<sub>f</sub>* = 0.52 (2:1)

IR (KBr)  $\nu$  = 3415, 2981, 2931, 2849, 1719, 1621, 1595, 1507, 1456, 1372, 1280, 1237, 1175, 1138, 1114, 1052, 1026.

<sup>1</sup>H NMR (250 MHz, acetone-*d*<sub>6</sub>):  $\delta$  = 1.28 (t, *J* = 7.1 Hz, 3H, CH<sub>3</sub>), 1.28 (s, 3H, CH<sub>3</sub>), 1.51 (s, 3H, CH<sub>3</sub>), 2.27 (quin d, *J* = 19.1, 3.7 Hz, 1H, CH<sub>2</sub>), 2.54–2.70 (m, 1H, CH<sub>2</sub>), 3.24–3.32 (m, 1H, CH), 3.51–3.59 (m, 1H, CH-CHO), 3.75–3.84 (m, 1H, benzylic-CH), 4.13–4.30 (m, 2H, OCH<sub>2</sub>), 5.80 (td, *J* = 6.3, 3.0 Hz, 1H, CH=), 6.30 (d, *J* = 2.5 Hz, 1H, Ar<sub>m</sub>-H), 6.50 (dd, *J* = 7.7, 2.5 Hz, 1H, Ar<sub>m</sub>-H), 7.15 (d, *J* = 7.7 Hz, 1H, Ar<sub>m</sub>-H), 8.29 (s, 1H, OH), 9.16 (s, 1H, CHO).

<sup>13</sup>C NMR (100 MHz, acetone-*d*<sub>6</sub>):  $\delta$  = 15.5, 24.6, 27.0, 27.3, 31.9, 39.6, 52.5, 62.5, 77.8, 105.9, 111.0, 114.9, 121.6, 130.0, 139.0, 156.7, 159.1, 175.1, 203.7.

MS (EI, 70 eV): *m/z* (%) = 330 (1) [M<sup>+</sup>], 149 (11), 83 (40), 57 (35), 46 (66), 43 (100).

HRMS–EI: *m/z* [M<sup>+</sup>] calcd for C<sub>19</sub>H<sub>22</sub>O<sub>5</sub>: 330.1467; found: 330.1468.

*Exo*-Isomer: 0.45 (2:1)

$^1\text{H}$  NMR (250 MHz, acetone- $d_6$ ):  $\delta$  = 1.20 (t,  $J$  = 7.1 Hz, 3H,  $\text{CH}_3$ ), 1.40 (s, 3H,  $\text{CH}_3$ ), 1.44 (s, 3H,  $\text{CH}_3$ ), 2.20–2.51 (m, 2H,  $\text{CH}_2$ ), 2.92 (td,  $J$  = 10.4, 5.4 Hz, 1H, CH), 3.17 (ddd,  $J$  = 11.0, 9.0, 2.3 Hz, 1H,  $\text{CH-CHO}$ ), 3.85 (bd,  $J$  = 7.9 Hz, 1H, CH-benzylic), 4.09 (qd,  $J$  = 7.1, 2.4 Hz, 2H,  $\text{OCH}_2$ ), 5.76 (td,  $J$  = 5.2, 2.6 Hz, 1H,  $\text{CH=}$ ), 6.30 (d,  $J$  = 2.5 Hz, 1H,  $\text{Ar}_m\text{-H}$ ), 6.42 (dd,  $J$  = 8.4, 2.5 Hz, 1H,  $\text{Ar}_m\text{-H}$ ), 6.96 (dd,  $J$  = 8.4, 1.1 Hz, 1H,  $\text{Ar}_m\text{-H}$ ), 8.24 (s, 1H, OH), 10.15 (d,  $J$  = 2.3 Hz, 1H, CHO).

$^{13}\text{C}$  NMR (63 MHz, acetone- $d_6$ ):  $\delta$  = 15.4, 28.7, 28.8, 29.6, 35.2, 42.7, 53.5, 62.4, 80.0, 106.5, 110.3, 119.1, 119.3, 128.5, 141.8, 156.9, 159.1, 175.0, 205.2.

MS (EI, 70 eV):  $m/z$  (%) = 330 (3) [ $\text{M}^+$ ], 315 (9), 149 (13), 83 (23), 57 (39), 43 (100).

HRMS–EI:  $m/z$  [ $\text{M}^+$ ] calcd for  $\text{C}_{19}\text{H}_{22}\text{O}_5$ : 330.1467; found: 330.1465.

**9-Hydroxy-6,6-dimethyl-3a,4,11b,11c-tetrahydrochromeno[4,3-e]isoindole-1,3(2*H*,6*H*)-dione (21{2,7}):**

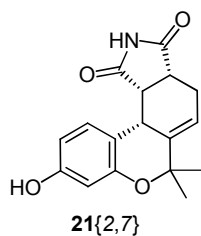

Yield for Wittig, Diels-Alder and cleavage: 23%. *Endo/Exo* = 1:0.

Flash chromatography in cyclohexane/EtOAc = 2:3.

*Endo*-Isomer:  $R_f$  = 0.26. Yellow solid. Similar structures can be found in reference [6].

$^1\text{H}$  NMR (400 MHz, acetone- $d_6$ ):  $\delta$  = 1.30 (s, 3H,  $\text{CH}_3$ ), 1.35 (s, 3H,  $\text{CH}_3$ ), 2.20–2.27 (m, 1H,  $\text{CH}_2$ ), 2.70 (ddd,  $J$  = 15.0, 7.4, 1.6 Hz, 1H,  $\text{CH}_2$ ), 3.26 (ddd,  $J$  = 8.5, 7.6, 1.6 Hz, 1H, CH), 3.59 (td,  $J$  = 6.5, 3.1 Hz, 1H, CH-benzylic), 3.64 (dd,  $J$  = 8.5, 6.5 Hz, 1H, CH), 5.90 (td,  $J$  = 7.4, 3.1 Hz, 1H,  $\text{CH=}$ ), 6.28 (d,  $J$  = 2.5 Hz, 1H,  $\text{Ar}_m\text{-H}$ ), 6.47 (dd,  $J$  = 8.5, 2.5 Hz, 1H,  $\text{Ar}_m\text{-H}$ ), 7.22 (d,  $J$  = 8.5 Hz, 1H,  $\text{Ar}_m\text{-H}$ ), 8.15 (s, 1H, OH).

$^{13}\text{C}$  NMR (100 MHz, acetone- $d_6$ ):  $\delta$  = 26.0, 28.0, 28.6, 31.4, 35.8, 43.2, 47.3, 77.8, 106.4, 110.7, 116.5, 120.0, 130.5, 147.1, 156.7, 158.7, 178.7, 181.6.

MS (EI, 70 eV):  $m/z$  (%) = 299 (12) [ $\text{M}^+$ ], 280 (26), 187 (13), 109 (10), 101 (25), 64 (20), 59 (42), 43 (100).

HRMS–EI:  $m/z$  [ $M^+$ ] calcd for  $C_{17}H_{17}NO_4$ : 299.1158; found: 299.1155.

**9-Hydroxy-2,6,6-trimethyl-3a,4,11b,11c-tetrahydrochromeno[4,3-e]isoindole-1,3(2*H*,6*H*)-dione (21{2,8}):**

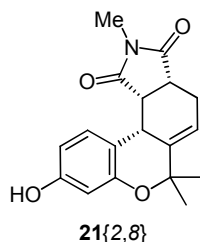

Yield for Wittig, Diels-Alder and cleavage: 27%. *Endo/Exo* = 1:0.

Flash chromatography in cyclohexane/EtOAc = 2:1.

*Endo*-Isomer:  $R_f$  = 0.10. Colorless solid.

$^1H$  NMR (400 MHz, acetone- $d_6$ ):  $\delta$  = 1.26 (s, 3H,  $CH_3$ ), 1.30 (s, 3H,  $CH_3$ ), 2.21–2.29 (m, 1H,  $CH_2$ ), 2.71 (s, 3H,  $CH_3$ ), 2.73 (ddd,  $J$  = 15.0, 7.5, 1.6 Hz, 1H,  $CH_2$ ), 3.25 (t,  $J$  = 7.3 Hz, 1H, CH), 3.60–3.66 (m, 2H, 2CH), 5.85 (td,  $J$  = 7.3, 3.0 Hz, 1H, CH=), 6.29 (d,  $J$  = 2.5 Hz, 1H,  $Ar_m$ -H), 6.48 (dd,  $J$  = 8.3, 2.5 Hz, 1H,  $Ar_m$ -H), 7.25 (d,  $J$  = 8.3 Hz, 1H,  $Ar_m$ -H), 8.16 (s, 1H, OH).

$^{13}C$  NMR (100 MHz, acetone- $d_6$ ):  $\delta$  = 25.5, 26.1, 28.1, 28.5, 35.9, 37.9, 42.0, 46.2, 77.8, 106.4, 110.7, 116.4, 120.0, 130.5, 147.1, 156.7, 158.8, 178.0, 180.9.

MS (EI, 70 eV):  $m/z$  (%) = 313 (1) [ $M^+$ ], 64 (34), 58 (34), 46 (100), 43 (86).

HRMS–EI:  $m/z$  [ $M^+$ ] calcd for  $C_{18}H_{19}NO_4$ : 313.1314; found: 313.1315.

**3-Hydroxy-6,6-dimethyl-8a,9,10,11,12a,12b-hexahydro-6*H*-naphtho[2,1-*c*]chromen-12(8*H*)-one (21{2,9}):**

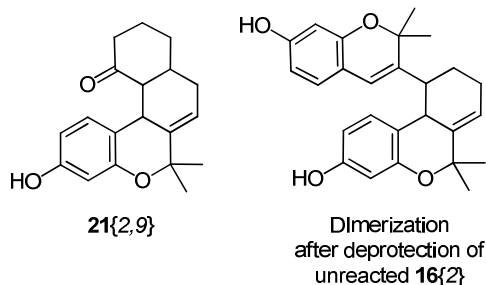

Yield of dimerization product: 31%. Single diastereomer.

Flash chromatography in cyclohexane/EtOAc (4:1) up to (2:1).

**21{2,9}**:  $R_f = 0.44$ . Mixture. Only traces of product.

Recognizable signals in  $^1\text{H}$  NMR (250 MHz, acetone- $d_6$ ):  $\delta = 2.64\text{--}2.76$  (m, 1H, CH), 3.65–3.75 (m, 1H, CH), 4.63 (d  $J = 11.0$  Hz, 1H, CH), 5.78–5.80 (m, 1H, CH=), 7.09 (d,  $J = 8.4$  Hz, 1H, Ar<sub>m</sub>-H).

MS (EI, 70 eV):  $m/z$  (%) = 338 (2), 323 (3), 286 (2), 283 (4), 202 (3), 189 (7), 187 (6), 161 (15), 101 (24), 59 (39), 43 (100).

HRMS–EI:  $m/z$  [ $M^+$ ] calcd for C<sub>19</sub>H<sub>22</sub>O<sub>3</sub>: 298.1569; found: 298.1566.

Dimerization product:  $R_f = 0.38$ .

$^1\text{H}$  NMR (400 MHz, acetone- $d_6$ ):  $\delta = 1.30$  (s, 6H, CH<sub>3</sub>), 1.44 (s, 3H, CH<sub>3</sub>), 1.58 (s, 3H, CH<sub>3</sub>), 1.41–2.20 (m, 4H, CH<sub>2</sub>), 3.32–3.38 (m, 1H, CH), 3.91–3.99 (m, 1H, CH), 5.75–5.80 (m, 1H, CH=), 6.08 (s, 1H, CH=), 6.14 (d,  $J = 2.4$  Hz, 1H, Ar<sub>m</sub>-H), 6.19 (d,  $J = 2.4$  Hz, 1H, Ar<sub>m</sub>-H), 6.21 (dd,  $J = 8.1, 2.4$  Hz, 1H, Ar<sub>m</sub>-H), 6.32 (dd,  $J = 8.4, 2.4$  Hz, 1H, Ar<sub>m</sub>-H), 6.47 (d,  $J = 8.1$  Hz, 1H, Ar<sub>m</sub>-H), 7.05 (d,  $J = 8.4$  Hz, 1H, Ar<sub>m</sub>-H), 7.96 (s, 1H, OH), 8.18 (s, 1H, OH).

$^{13}\text{C}$  NMR (100 MHz, acetone- $d_6$ ):  $\delta = 23.2, 26.9, 27.1, 27.9, 28.2$  (2C), 39.0, 39.5, 78.2, 80.4, 104.8, 105.4, 109.4, 110.2, 117.6, 118.0, 121.5, 122.2, 128.4, 129.6, 135.6, 139.8, 155.1, 156.2, 158.1, 159.5.

MS (EI, 70 eV):  $m/z$  (%) = 404 (19) [ $M^+$ ], 402 (47), 400 (36), 387 (63), 385 (69), 211 (23), 202 (67), 187 (100), 43 (41).

HRMS–EI:  $m/z$  [ $M^+$ ] calcd for C<sub>26</sub>H<sub>28</sub>O<sub>4</sub>: 404.1988; found: 404.1984.

**8a,10,11,12a-tetrachloro-3-hydroxy-6,6-dimethyl-8,8a-dihydro-6H-naphtho[2,1-c]chromene-9,12(12aH,12bH)-dione (21{2,10})**:

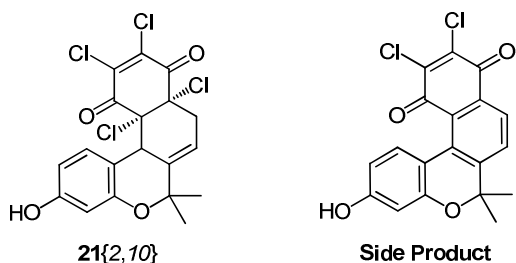

Yield for Wittig, Diels-Alder and cleavage: 11% + 8% side product. *Endo/Exo* = 1:1.

Flash chromatography in cyclohexane/EtOAc (2:1). *Exo*- and *endo*-isomer not separable.

*Exo*- and *endo*-isomer:  $R_f = 0.21$

$^1\text{H}$  NMR (400 MHz, acetone- $d_6$ ):  $\delta = 1.30$  (s, 3H,  $\text{CH}_3$ ), 1.51 (s, 3H,  $\text{CH}_3$ ), 2.98 (ddd,  $J = 19.6, 4.4, 2.2$  Hz, 1H,  $\text{CH}_2$ ), 3.44 (ddd,  $J = 19.6, 3.1, 2.2$  Hz, 1H, CH), 4.56–4.62 (m, 1H, CH), 5.83 (td,  $J = 4.4, 3.1$  Hz, 1H,  $\text{CH}=\text{C}$ ), 6.36 (d,  $J = 2.6$  Hz, 1H,  $\text{Ar}_m\text{-H}$ ), 6.41 (dd,  $J = 8.6, 2.6$  Hz, 1H,  $\text{Ar}_m\text{-H}$ ), 7.55 (d,  $J = 8.6$  Hz, 1H,  $\text{Ar}_m\text{-H}$ ), 8.35 (s, 1H, OH).

$^{13}\text{C}$  NMR (100 MHz, acetone- $d_6$ ):  $\delta = 26.4, 28.2, 38.9, 42.4, 78.3, 79.6, 80.5, 106.6+106.7, 109.9+110.0, 113.6, 116.9, 131.3, 140.5, 142.0, 143.7, 158.8, 159.4+159.5, 180.4, 183.3$ .

MS (EI, 70 eV):  $m/z$  (%) = 450 (9), 448 (16), 447 (7), 446 (11) [ $\text{M}^+$ ], 415 (29), 414 (39), 413 (100), 412 (22), 411 (71), 189 (16), 188 (58), 187 (74).

HRMS–EI:  $m/z$  [ $\text{M}^+$ ] calcd for  $\text{C}_{19}\text{H}_{14}\text{Cl}_4\text{O}_4$ : 445.9646; found: 445.9644.

Side-Product:  $R_f = 0.16$ . Purity: 75%

$^1\text{H}$  NMR (400 MHz, acetone- $d_6$ ):  $\delta = 1.58$  (s, 6H,  $2\text{CH}_3$ ), 6.47 (d,  $J = 2.5$  Hz, 1H,  $\text{Ar}_m\text{-H}$ ), 6.50 (dd,  $J = 8.6, 2.5$  Hz, 1H,  $\text{Ar}_m\text{-H}$ ), 7.45 (d,  $J = 8.6$  Hz, 1H,  $\text{Ar}_m\text{-H}$ ), 7.78 (d,  $J = 8.0$  Hz, 1H,  $\text{Ar}_m\text{-H}$ ), 8.01 (d,  $J = 8.0$  Hz, 1H,  $\text{Ar}_m\text{-H}$ ), 8.93 (s, 1H, OH).

$^{13}\text{C}$  NMR (100 MHz, acetone- $d_6$ ):  $\delta = 27.9$  (2C), 80.0, 106.6, 111.4, 115.0, 127.4, 128.9, 130.3, 133.3, 134.3, 134.6, 142.0, 146.8, 151.6, 157.7, 162.2, 177.7, 179.1.

MS (EI, 70 eV):  $m/z$  (%) = 451 (3), 449 (5), 447 (4), 414 (7), 412 (24), 411 (10), 410 (11), 399 (18), 398 (10), 397 (37), 396 (10), 395 (29), 376 (28), 375 (11), 374 [ $\text{M}^+$ ,  $\text{C}_{19}\text{H}_{12}\text{O}_4\text{Cl}_2$ ] (34), 361 (66), 360 (23), 359 (100), 253 (41), 189 (60). Higher masses probably due to impurities.

HRMS–EI:  $m/z$  [ $\text{M}^+$ ] calcd for  $\text{C}_{19}\text{H}_{12}\text{Cl}_2\text{O}_4$ : 374.0113; found: 374.0112.

**Diisopropyl 8-hydroxy-5,5-dimethyl-5,10b-dihydro-1*H*-chromeno[4,3-*c*]pyridazine-1,2(3*H*)-dicarboxylate (21{2,11}):**

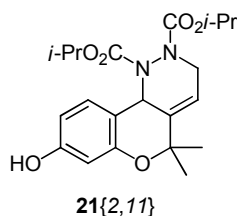



Yield for Wittig, Diels-Alder and cleavage: 30%.

Flash chromatography in cyclohexane/EtOAc (3:1).  $R_f$  = 0.21.

2 Rotamers in a ratio of ~ 4:1.

$^1\text{H}$  NMR (500 MHz, acetone- $d_6$ ):  $\delta$  = 0.92–1.21 (m, 12H, 4CH<sub>3</sub>), 1.34 (s, 3H, CH<sub>3</sub>, major), 1.35 (s, 3H, CH<sub>3</sub>, minor), 1.38 (s, 3H, CH<sub>3</sub>, minor), 1.40 (s, 3H, CH<sub>3</sub>, major), 3.57 (bd,  $J$  = 17.0 Hz, 1H, CH<sub>2</sub>, major), 3.66–3.75 (m, 1H, CH<sub>2</sub>, minor), 4.17 (bd,  $J$  = 20.0 Hz, 1H, CH<sub>2</sub>, major), 4.31 (bd,  $J$  = 14.0 Hz, 1H, CH<sub>2</sub>, minor), 4.64 (sept,  $J$  = 6.2 Hz, 1H, CH, major), 4.73 (sept,  $J$  = 6.2 Hz, 1H, CH, minor), 4.89 (sept,  $J$  = 6.2 Hz, 1H, CH, major), 5.64 (bs, 1H, CH), 5.77 (d,  $J$  = 6.7 Hz, 1H, Ar<sub>m</sub>-H, minor), 5.89 (d,  $J$  = 5.2 Hz, 1H, Ar<sub>m</sub>-H, major), 6.08 (bs, 1H, CH=), 6.29 (bdd,  $J$  = 8.2, 1.7 Hz, 1H, Ar<sub>m</sub>-H, major), 7.17 (bd,  $J$  = 8.2 Hz, 1H, Ar<sub>m</sub>-H, major), 7.29 (bd,  $J$  = 8.2 Hz, 1H, Ar<sub>m</sub>-H, minor), 8.15 (bs, 1H, OH).

$^{13}\text{C}$  NMR (125 MHz, acetone- $d_6$ ):  $\delta$  = 23.0+23.2+23.4 (4C), 27.5, 27.6, 43.6, 53.5, 70.1+70.3+71.1+72.1 (2C), 79.3, 104.8+105.0, 109.6+109.8, 115.1, 119.2, 129.8, 137.9, 155.7, 156.5, 158.2, 160.0+160.1. Broad and multiple signals due to hindered rotation.

MS (EI, 70 eV):  $m/z$  (%) = 404 (5) [ $\text{M}^+$ ], 275 (11), 109 (33), 65 (59), 63 (16), 46 (100).

HRMS–EI:  $m/z$  [ $\text{M}^+$ ] calcd for C<sub>21</sub>H<sub>28</sub>N<sub>2</sub>O<sub>6</sub>: 404.1947; found: 404.1950.

**Dibenzyl 8-hydroxy-5,5-dimethyl-5,10b-dihydro-1H-chromeno[4,3-c]pyridazine-1,2(3H)-dicarboxylate (21{2,12}):**

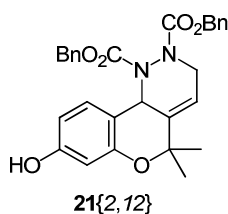

Yield for Wittig, Diels-Alder and cleavage: 48%.

Flash chromatography in cyclohexane/EtOAc (4:1) up to 2:1. TLC in the latter  $R_f$  = 0.40.

2 Rotamers in a ratio of ~ 3:1. Structure confirmed by CH+HHCOSY.

$^1\text{H}$  NMR (400 MHz, acetone- $d_6$ ):  $\delta$  = 1.46+1.48 (s, 3H, CH<sub>3</sub>), 1.50+1.53 (s, 3H, CH<sub>3</sub>), 3.80+3.92 (bd,  $J$  = 17.3 Hz, 1H, CH<sub>2</sub>), 4.46 (bd,  $J$  = 12.7 Hz, 1H, CH<sub>2</sub>), 4.98 (bs, 2H, OCH<sub>2</sub>), 5.27 (bs, 2H, OCH<sub>2</sub>), 5.80 (bs, 1H, CH), 5.93+6.03 (bs+bd,  $J$  = 5.3 Hz, 1H, CH=), 6.20–6.28+6.44 (m+bd,  $J$  = 7.7 Hz, 2H, Ar<sub>m</sub>-H), 7.17 (d,  $J$  = 8.8 Hz, 1H, Ar<sub>m</sub>-H), 7.22–7.48 (m, 10H, Ar<sub>m</sub>-H), 8.27 (s, 1H, OH).

$^{13}\text{C}$  NMR (100 MHz, acetone- $d_6$ ):  $\delta$  = 27.5, 27.3, 44.06+44.11, 53.9+54.0, 69.2+68.3, 69.8, 79.3+79.8, 104.9+105.1, 109.7+109.8, 114.8, 119.1, 129.3+129.7+129.78+129.81+130.0+130.17+130.22+ 130.4 (13C), 138.2+138.8, 156.0+156.4, 158.3, 160.1 (2C).

MS (EI, 70 eV):  $m/z$  (%) = 500 (1) [ $\text{M}^+$ ], 365 (15), 321 (11), 187 (19), 91 (100)

HRMS–EI:  $m/z$  [ $\text{M}^+$ ] calcd for  $\text{C}_{29}\text{H}_{28}\text{N}_2\text{O}_6$ : 500.1947; found: 500.1950.

**10-Acetyl-3-hydroxy-8,9,10,10a-tetrahydro-6H-benzo[c]chromen-7(6aH)-one (24{5,I}):**

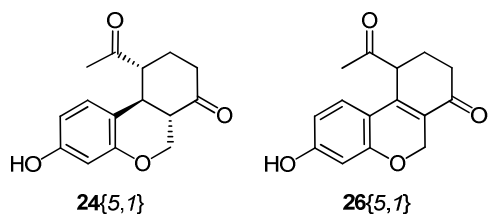

Yield for enol-ether formation, Diels-Alder and cleavage (DCE/EtOH): 35% of **24{5,I}** (*endo/exo* = 1:2), 15% of **26{5,I}** and 20% starting material (DOMA-product).

Flash chromatography in cyclohexane/EtOAc (2:1), TLC in (1:1).

*Exo*-**24{5,I}**:  $R_f$  = 0.27

$^1\text{H}$  NMR (400 MHz, acetone- $d_6$ ):  $\delta$  = 1.88–1.98 (m, 1H,  $\text{CH}_2$ ), 2.05–2.30 (m, 3H,  $\text{CH}_2$ ), 2.62 (s, 3H,  $\text{CH}_3$ ), 2.93 (ddd,  $J$  = 5.9, 5.7, 3.2 Hz, 1H, CH next to  $\text{OCH}_2$ ), 3.53 (ddd,  $J$  = 5.9, 5.8, 4.2 Hz, 1H, CH), 3.76 (dd,  $J$  = 5.9, 5.9 Hz, 1H, CH-benzylic), 3.94 (dd,  $J$  = 10.9, 3.2 Hz, 1H,  $\text{OCH}_2$ ), 4.63 (dd,  $J$  = 10.9, 5.7 Hz, 1H,  $\text{OCH}_2$ ), 6.23 (d,  $J$  = 2.5 Hz, 1H,  $\text{Ar}_m\text{-H}$ ), 6.36 (dd,  $J$  = 8.5, 2.5 Hz, 1H,  $\text{Ar}_m\text{-H}$ ), 6.96 (d,  $J$  = 8.5 Hz, 1H,  $\text{Ar}_m\text{-H}$ ), 8.27 (s, 1H, OH).

$^{13}\text{C}$  NMR (100 MHz, acetone- $d_6$ ):  $\delta$  = 25.94 ( $\text{CH}_2$ ), 31.58 ( $\text{CH}_3$ ), 38.39 (CH), 39.49 ( $\text{CH}_2$ ), 47.22 (CH), 52.17 (CH), 65.39 ( $\text{OCH}_2$ ), 105.05 (CH, C- $\text{Ar}_m$ ), 110.31 (CH, C- $\text{Ar}_m$ ), 114.94 (C, C- $\text{Ar}_m$ ), 130.14 (CH, C- $\text{Ar}_m$ ), 157.41 (C, C- $\text{Ar}_m$ ), 159.18 (C, C- $\text{Ar}_m$ ), 208.59 (CO), 21.89 (CO).

MS (EI, 70 eV):  $m/z$  (%) = 260 (100) [ $\text{M}^+$ ], 217 (13), 190 (20), 148 (29), 101 (22), 59 (28), 43 (38).

HRMS–EI:  $m/z$  [ $\text{M}^+$ ] calcd for  $\text{C}_{15}\text{H}_{16}\text{O}_5$ : 260.1049; found: 260.1052.

*Endo*-**24{5,I}**:  $R_f$  = 0.23. Not separable from **26{5,I}**.

$^1\text{H}$  NMR (400 MHz, acetone- $d_6$ ):  $\delta$  = 2.24–2.50 (m, 4H,  $2\text{CH}_2$ ), 2.36 (s, 3H,  $\text{CH}_3$ ), 4.22–4.26 (m, 1H, CH), 4.79 (dd,  $J$  = 13.8, 1.4 Hz, 1H,  $\text{OCH}_2$ ), 4.95 (d,  $J$  = 13.8 Hz, 1H,  $\text{OCH}_2$ ), 6.37 (d,  $J$  = 2.4 Hz, 1H,  $\text{Ar}_m\text{-H}$ ), 6.50 (dd,  $J$  = 8.6, 2.4 Hz, 1H,  $\text{Ar}_m\text{-H}$ ), 7.286(d,  $J$  = 8.6 Hz, 1 H,  $\text{Ar}_m\text{-H}$ ), 9.07 (bs, 1H, OH).

$^{13}\text{C}$  NMR (100 MHz, acetone- $d_6$ ):  $\delta$  = 26.7, 34.9, 49.1, 64.6, 105.1, 111.6, 115.8, 125.1, 129.2, 146.86 (C=), 159.6, 163.3, 195.9. (C=O) +  $\text{CH}_3$  not detected due to NMR-solvent.

MS (EI, 70 eV):  $m/z$  (%) = 260 (100) [ $\text{M}^+$ ], 258 (55) [ $\text{M}^+$ ], 216 (42), 215 (62), 149 (51), 148 (76), 147 (92), 101 (42), 59 (42), 43 (69).

HRMS–EI:  $m/z$  [ $\text{M}^+$ ] calcd for  $\text{C}_{15}\text{H}_{16}\text{O}_4$ : 260.1049; found: 260.1050.

**26**{5,1}:  $R_f$  = 0.23. Not separable from **24**{5,1}.

$^1\text{H}$  NMR (400 MHz, acetone- $d_6$ ):  $\delta$  = 2.24–2.50 (m, 4H,  $2\text{CH}_2$ ), 2.37 (s, 3H,  $\text{CH}_3$ ), 3.06 (td,  $J$  = 5.8, 2.8 Hz, 1H, CH), 3.36 td,  $J$  = 11.4, 3.1 Hz, 1H, CH), 4.01 (d,  $J$  = 10.8, 3.2 Hz, 1H,  $\text{OCH}_2$ ), 4.22–4.26 (m, 1H, CH), 4.69 (dd,  $J$  = 10.8, 2.8 Hz, 1H,  $\text{OCH}_2$ ), 6.20 (d,  $J$  = 2.5 Hz, 1H,  $\text{Ar}_m\text{-H}$ ), 6.28 (dd,  $J$  = 8.5, 2.5 Hz, 1H,  $\text{Ar}_m\text{-H}$ ), 6.61 (d,  $J$  = 8.5 Hz, 1 H,  $\text{Ar}_m\text{-H}$ ), 8.26 (bs, 1H, OH).

$^{13}\text{C}$  NMR (100 MHz, acetone- $d_6$ ):  $\delta$  = 23.3, 29.5, 38.3, 40.9, 54.4, 66.2, 105.1, 109.9, 113.2, 129.4, 158.3, 159.9, 208.3, 211.1. One C was not detected, presumable because of isochronous signals.

HRMS–EI:  $m/z$  [ $\text{M}^+$ ] calcd for  $\text{C}_{15}\text{H}_{14}\text{O}_4$ : 258.0892; found: 258.0890.

**Methyl 3-hydroxy-7-oxo-6a,7,8,9,10,10a-hexahydro-6H-benzo[*c*]chromene-10-carboxylate (24{5,2}):**

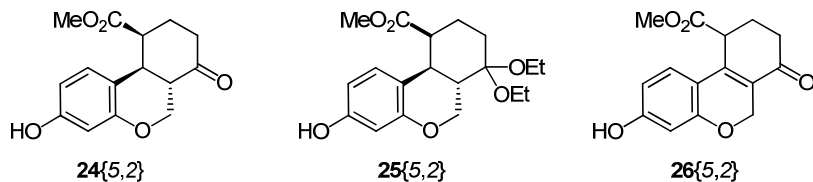

Yield for enol-ether formation, Diels-Alder and cleavage (DCE/EtOH): 51% of **24**{5,2} (*endo/exo* = 2:1), 22% of **25**{5,2}, 7% of **26**{5,2} and 20% starting material (DOMA-product).

Flash chromatography in cyclohexane/EtOAc (2:1).

*Exo*-**24**{5,2}:  $R_f$  = 0.25

$^1\text{H}$  NMR (500 MHz, acetone- $d_6$ ):  $\delta$  = 1.91–1.98 (m, 1H,  $\text{CH}_2$ ), 2.09–2.19 (m, 1H,  $\text{CH}_2$ ), 2.28–2.49 (m, 2H,  $\text{CH}_2$ ), 2.95 (ddd,  $J$  = 6.4, 6.3, 3.3 Hz, 1H, CH), 3.34 (ddd,  $J$  = 6.9, 6.9, 4.1 Hz, 1H, CH), 3.67–3.75

(m, 1H, CH-benzylic), 3.73 (s, 3H, OCH<sub>3</sub>), 3.95 (dd,  $J = 10.9, 3.3$  Hz, 1H, OCH<sub>2</sub>), 4.61 (dd,  $J = 10.9, 6.4$  Hz, 1H, OCH<sub>2</sub>), 6.24 (d,  $J = 2.4$  Hz, 1H, Ar<sub>m</sub>-H), 6.38 (dd,  $J = 8.3, 2.4$  Hz, 1H, Ar<sub>m</sub>-H), 6.98 (d,  $J = 8.3$  Hz, 1H, Ar<sub>m</sub>-H), 8.29 (bs, 1H, OH).

<sup>13</sup>C NMR (125 MHz, acetone-*d*<sub>6</sub>):  $\delta = 26.6, 39.4, 39.5, 45.6, 47.6, 53.2, 65.3, 105.0, 110.4, 114.5, 130.2, 157.2, 159.4, 176.2$ . Ketone C=O was not detected.

MS (EI, 70 eV):  $m/z$  (%) = 276 (8) [M<sup>+</sup>], 147 (11), 129 (44), 101 (39), 75 (17), 64 (17), 59 (51), 46 (70), 43 (100).

HRMS–EI:  $m/z$  [M<sup>+</sup>] calcd for C<sub>15</sub>H<sub>16</sub>O<sub>5</sub>: 276.0998; found: 276.0996.

*Endo*-**24**{5,2}:  $R_f = 0.13$ . Yellow solid.

<sup>1</sup>H NMR (400 MHz, acetone-*d*<sub>6</sub>):  $\delta = 1.81$ – $1.93$  (m, 1H, CH<sub>2</sub>), 2.22– $2.32$  (m, 2H, CH<sub>2</sub>), 2.43– $2.52$  (m, 1H, CH<sub>2</sub>), 3.02 (ddd,  $J = 5.8, 3.0, 2.8$  Hz, 1H, CH), 3.41 (td,  $J = 11.8, 3.3$  Hz, 1H, CH), 3.76 (s, 3H, OCH<sub>3</sub>), 4.05 (dd,  $J = 10.8, 3.0$  Hz, 1H, OCH<sub>2</sub>), 4.04– $4.09$  (m, 1H, CH-benzylic), 4.70 (dd,  $J = 10.8, 2.8$  Hz, 1H, OCH<sub>2</sub>), 6.20 (d,  $J = 2.5$  Hz, 1H, Ar<sub>m</sub>-H), 6.31 (dd,  $J = 8.5, 2.5$  Hz, 1H, Ar<sub>m</sub>-H), 6.68 (d,  $J = 8.5$  Hz, 1H, Ar<sub>m</sub>-H), 8.28 (bs, 1H, OH).

<sup>13</sup>C NMR (100 MHz, acetone-*d*<sub>6</sub>):  $\delta = 23.7, 38.3, 40.9, 45.7, 48.9, 53.3, 66.1, 105.2, 110.0, 113.1, 129.3, 158.1, 159.2, 176.0, 208.0$ .

MS (EI, 70 eV):  $m/z$  (%) = 276 (2) [M<sup>+</sup>], 259 (4), 129 (19), 101 (27), 87 (21), 58 (30), 57 (52), 46 (40), 43 (100).

HRMS–EI:  $m/z$  [M<sup>+</sup>] calcd for C<sub>15</sub>H<sub>16</sub>O<sub>5</sub>: 276.0998; found: 276.1000.

**25**{5,2}:  $R_f = 0.40$

<sup>1</sup>H NMR (500 MHz, acetone-*d*<sub>6</sub>):  $\delta = 1.16$  (t,  $J = 7.1$  Hz, 3H, CH<sub>3</sub>), 1.20 (t,  $J = 7.1$  Hz, 3H, CH<sub>3</sub>), 1.43– $1.51$  (m, 1H, CH<sub>2</sub>), 1.70– $1.85$  (m, 2H, CH<sub>2</sub>), 1.93– $1.99$  (m, 1H, CH<sub>2</sub>), 2.42– $2.48$  (m, 1H, CH), 2.63 (td,  $J = 12.0, 4.3$  Hz, 1H, CH), 3.10 (dd,  $J = 11.5, 4.3$  Hz, 1H, CH), 3.49 (q,  $J = 7.1$  Hz, 1H, OCH<sub>2</sub>), 3.54 (q,  $J = 7.1$  Hz, 1H, OCH<sub>2</sub>), 3.58 (s, 3H, OCH<sub>3</sub>), 4.09– $4.18$  (m, 2H, OCH<sub>2</sub>), 6.23 (d,  $J = 2.4$  Hz, 1H, Ar<sub>m</sub>-H), 6.27 (dd,  $J = 8.3, 2.4$  Hz, 1H, Ar<sub>m</sub>-H), 6.73 (d,  $J = 8.3$  Hz, 1H, Ar<sub>m</sub>-H), 8.15 (s, 1H, OH).

<sup>13</sup>C NMR (125 MHz, acetone-*d*<sub>6</sub>):  $\delta = 16.6$  (2C), 27.6, 30.0, 37.9, 40.2, 49.0, 52.5, 56.3, 56.5, 64.7, 101.2, 104.7, 109.4, 117.2, 131.9, 156.7, 159.3, 177.1.

MS (EI, 70 eV):  $m/z$  (%) = 350 (3) [M<sup>+</sup>], 155 (16), 101 (36), 91 (14), 75 (24), 59 (61), 43 (100).

HRMS–EI:  $m/z$  [M<sup>+</sup>] calcd for C<sub>19</sub>H<sub>26</sub>O<sub>6</sub>: 350.1927; found: 350.1931.

**26{5,2}**:  $R_f = 0.20$

$^1\text{H}$  NMR (400 MHz, acetone- $d_6$ ):  $\delta = 2.32\text{--}2.62$  (m, 4H,  $2\text{CH}_2$ ), 3.69 (s, 3H,  $\text{OCH}_3$ ), 4.02–4.07 (m, 1H, CH), 4.86 (AB-sys.,  $J = 13.9$  Hz, 2H,  $\text{OCH}_2$ ), 6.37 (d,  $J = 2.4$  Hz, 1H,  $\text{Ar}_m\text{-H}$ ), 6.52 (dd,  $J = 8.6, 2.4$  Hz, 1H,  $\text{Ar}_m\text{-H}$ ), 7.28 (d,  $J = 8.6$  Hz, 1H,  $\text{Ar}_m\text{-H}$ ), 9.08 (bs, 1H, OH).

$^{13}\text{C}$  NMR (100 MHz, acetone- $d_6$ ):  $\delta = 27.4, 35.1, 41.4, 53.7, 64.6, 105.0, 111.6, 115.6, 124.6, 129.2, 145.7, 159.6, 163.4, 173.5, 196.0$ .

MS (EI, 70 eV):  $m/z$  (%) = 276 (100), 274 [ $\text{M}^+$ ] (55), 216 (40), 215 (23), 190 (18), 160 (17), 148 (29), 147 (45), 43 (23).

HRMS–EI:  $m/z$  [ $\text{M}^+$ ] calcd for  $\text{C}_{15}\text{H}_{14}\text{O}_5$ : 274.0841; found: 274.0835.

**3-Hydroxy-7-oxo-6a,7,8,9,10,10a-hexahydro-6H-benzo[c]chromene-10-carbonitrile (24{5,3}):**

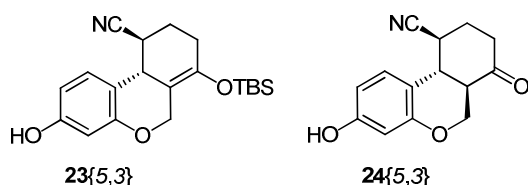

Yield for enol-ether formation, Diels-Alder and cleavage (THF/water): 15% of **23{5,3}** and 10% of **24{5,3}** (*endo/exo* = 0:1), and 8% of starting material (DOMA-product).

**General Procedure for TBS-cleavage:**

To the TBS-protected enol-ether (0.014 mmol) in acetonitrile (1 mL) was added TBAF·3H<sub>2</sub>O (9 mg, 0.028 mmol). The mixture was stirred for 2 h at r.t. Then brine was added (10 mL), followed by extraction with Et<sub>2</sub>O (3 × 10 mL). The combined organic layers were dried, concentrated and purified by flash chromatography.

Flash chromatography in cyclohexane/EtOAc (4:1) up to (2:1). TLC in the latter.

*Exo*-**23{5,3}**:  $R_f = 0.60$

$^1\text{H}$  NMR (500 MHz, acetone- $d_6$ ):  $\delta = 0.19$  (s, 3H,  $\text{SiCH}_3$ ), 1.20 (s, 3H,  $\text{SiCH}_3$ ), 0.98 (s, 9H,  $3\text{CH}_3$ ), 2.15–2.05 (m, 1H,  $\text{CH}_2$ ), 2.20–2.31 (m, 2H,  $\text{CH}_2$ ), 2.35–2.45 (m, 1H,  $\text{CH}_2$ ), 3.84 (ddd,  $J = 11.4, 9.3, 3.0$  Hz, 1H, NC-CH), 3.85 (bd,  $J = 9.3$  Hz, 1H, CH), 4.13 (d,  $J = 11.5$  Hz, 1H,  $\text{OCH}_2$ ), 5.07 (d,  $J = 11.5$  Hz, 1H,  $\text{OCH}_2$ ), 6.27 (d,  $J = 2.6$  Hz, 1H,  $\text{Ar}_m\text{-H}$ ), 6.45 (dd,  $J = 8.6, 2.6$  Hz, 1H,  $\text{Ar}_m\text{-H}$ ), 7.57 (d,  $J = 8.6$  Hz, 1H,  $\text{Ar}_m\text{-H}$ ), 8.30 (s, 1H, OH).

$^{13}\text{C}$  NMR (125 MHz, acetone- $d_6$ ):  $\delta = -2.9, -2.8, 19.8, 27.1$  (3C), 28.4, 30.3, 33.3, 39.0, 64.8, 105.4, 110.4, 111.0, 117.7, 124.9, 129.3, 148.0, 158.3, 159.2.

MS (EI, 70 eV):  $m/z$  (%) = 357 (7) [ $\text{M}^+$ ], 301 (26), 300 (100), 273 (29), 248 (18), 73 (20).

HRMS–EI:  $m/z$  [ $\text{M}^+$ ] calcd for  $\text{C}_{20}\text{H}_{27}\text{NO}_3\text{Si}$ : 357.1760; found: 357.1761.

*Exo*-**24**{5,3}:  $R_f = 0.20$ . Yield for TBS-cleavage: 60%.

$^1\text{H}$  NMR (500 MHz, acetone- $d_6$ ):  $\delta = 2.05$ – $2.21$  (m, 2H,  $\text{CH}_2$ ), 2.35– $2.46$  (m, 1H,  $\text{CH}_2$ ), 2.54– $2.63$  (m, 1H,  $\text{CH}_2$ ), 3.04 (ddd,  $J = 5.8, 5.6, 3.3$  Hz, 1H, CH), 3.74 (dd,  $J = 6.0, 5.6$  Hz, 1H, CH), 3.81 (ddd,  $J = 6.3, 6.0, 3.7$  Hz, 1H, CH), 4.00 (dd,  $J = 11.1, 3.3$  Hz, 1H,  $\text{OCH}_2$ ), 4.66 (d,  $J = 11.1, 5.8$  Hz, 1H,  $\text{OCH}_2$ ), 6.25 (d,  $J = 2.5$  Hz, 1H,  $\text{Ar}_m\text{-H}$ ), 6.44 (dd,  $J = 8.5, 2.5$  Hz, 1H,  $\text{Ar}_m\text{-H}$ ), 7.19 (d,  $J = 8.5$  Hz, 1H,  $\text{Ar}_m\text{-H}$ ), 8.40 (s, 1H, OH).

$^{13}\text{C}$  NMR (100 MHz, acetone- $d_6$ ):  $\delta = 26.7, 32.2, 39.1, 39.7, 47.2, 65.1, 105.1, 110.6, 112.4, 122.8, 130.6, 157.4, 159.9$ . C=O not detected.

MS (EI, 70 eV):  $m/z$  (%) = 243 (7) [ $\text{M}^+$ ], 189 (62), 175 (20), 149 (26), 148 (61), 147 (73).

HRMS–EI:  $m/z$  [ $\text{M}^+$ ] calcd for  $\text{C}_{14}\text{H}_{13}\text{NO}_3$ : 243.0895; found: 243.0895.

**9-Hydroxy-2-methyl-3a,4,5a,6-tetrahydrochromeno[4,3-*e*]isoindole-1,3,5(2*H*,11*bH*,11*cH*)-trione (24{5,8}):**

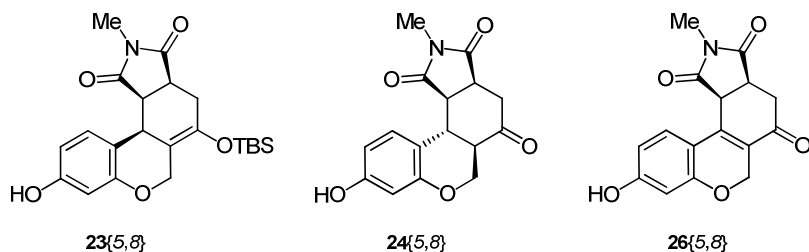

Yield for enol-ether formation, Diels-Alder and cleavage (THF/water): 20% of *exo*-**23**{5,8} and 12% of **24**{5,8} (*endo/exo* = 4:5), and 10% of **26**{5,8}.

Flash chromatography in cyclohexane/EtOAc (1:1). *Exo*- and *endo*-diastereomers not separable.

TBS-cleavage of *endo*-**23**{5,8} gives 35% of a diastereomeric mixture (*endo/exo* = 1:3).

*Endo*-**23**{5,8}:  $R_f = 0.32$ . In a mixture with *exo*-**24**{5,8}.

$^1\text{H}$  NMR (500 MHz, acetone- $d_6$ ):  $\delta$  = 0.12 (s, 3H, SiCH<sub>3</sub>), 1.19 (s, 3H, SiCH<sub>3</sub>), 0.95 (s, 9H, 3 CH<sub>3</sub>), 2.61–2.65 (m, 2H, CH<sub>2</sub>), 2.74 (s, 3H, CH<sub>3</sub>), 3.31 (ddd,  $J$  = 8.7, 6.3, 3.2 Hz, 1H, CH), 3.52 (dd,  $J$  = 8.7 6.1 Hz, 1H, CH), 3.68 (d,  $J$  = 6.1 Hz, 1H, CH-benzylic), 4.25 (d,  $J$  = 13.1 Hz, 1H, OCH<sub>2</sub>), 4.64 (d,  $J$  = 13.1 Hz, 1H, OCH<sub>2</sub>), 6.31 (d,  $J$  = 2.5 Hz, 1H, Ar<sub>m</sub>-H), 6.48 (dd,  $J$  = 8.3, 2.5 Hz, 1H, Ar<sub>m</sub>-H), 7.20 (d,  $J$  = 8.3 Hz, 1H, Ar<sub>m</sub>-H), 8.16 (s, 1H, OH).

$^{13}\text{C}$  NMR (125 MHz, acetone- $d_6$ ):  $\delta$  = –3.4, –2.9, 19.6, 25.8, 27.0 (3C), 31.6, 35.9, 42.3, 46.6, 64.8, 105.8, 111.1, 113.6, 116.9, 131.2, 145.5, 158.5, 159.6, 177.7, 180.7.

MS (EI, 70 eV):  $m/z$  (%) = 415 (10) [ $\text{M}^+$ ], 386 (24), 357 (25), 358 (100), 273 (15), 167 (15).

HRMS–EI:  $m/z$  [ $\text{M}^+$ ] calcd for C<sub>22</sub>H<sub>29</sub>NO<sub>5</sub>Si: 415.1815; found: 415.1816.

*Exo*-**24**{5,8}:  $R_f$  = 0.09. In admixture with *endo*-**24**{5,8}.

$^1\text{H}$  NMR (400 MHz, acetone- $d_6$ ):  $\delta$  = 2.43 (ddd,  $J$  = 14.1, 10.6, 4.2 Hz, 1H, CH), 2.79 (m, 1H, CH<sub>2</sub>), 2.83 (s, 3H, CH<sub>3</sub>), 3.02 (dd,  $J$  = 17.9, 8.3 Hz, 1H, CH<sub>2</sub>), 3.61 (ddd,  $J$  = 9.5, 8.3, 2.0 Hz, 1H, CH), 3.73 (dd,  $J$  = 11.1, 10.6 Hz, 1H, OCH<sub>2</sub>), 3.78 (dd,  $J$  = 14.1, 6.0 Hz, 1H, CH-benzylic), 4.06 (dd,  $J$  = 9.5, 6.0 Hz, 1H, CH), 4.49 (dd,  $J$  = 11.1, 4.2 Hz, 1H, OCH<sub>2</sub>), 6.24 (d,  $J$  = 2.5 Hz, 1H, Ar<sub>m</sub>-H), 6.47 (dd,  $J$  = 8.5, 2.5 Hz, 1H, Ar<sub>m</sub>-H), 7.37 (d,  $J$  = 8.5 Hz, 1H, Ar<sub>m</sub>-H), 8.24 (s, 1H, OH).

$^{13}\text{C}$  NMR (100 MHz, acetone- $d_6$ ):  $\delta$  = 25.9, 36.3, 37.9, 39.3, 42.2, 46.7, 66.4, 104.9, 110.4, 113.7, 131.7, 157.4, 158.8, 177.4, 180.2, 209.3.

*Endo*-**24**{5,8}:  $R_f$  = 0.09

$^1\text{H}$  NMR (400 MHz, acetone- $d_6$ ):  $\delta$  = 2.54 (dd,  $J$  = 13.8, 3.9 Hz, 1H, CH<sub>2</sub>), ~2.85 (s, 3H, CH<sub>3</sub>), 3.09 (ddd,  $J$  = 10.2, 6.6, 4.5 Hz, 1H, CH), 3.15 (dd,  $J$  = 13.8, 8.6 Hz, 1H, CH<sub>2</sub>), 3.58–3.64 (m, 1H, CH), 3.68–3.82 (m, 2H, CH+OCH<sub>2</sub>), 4.11 (dd,  $J$  = 6.6, 6.3 Hz, 1H, CH) 4.24 (dd,  $J$  = 11.2, 4.3 Hz, 1H, OCH<sub>2</sub>), 6.27 (d,  $J$  = 2.5 Hz, 1H, Ar<sub>m</sub>-H), 6.44 (dd,  $J$  = 8.4, 2.5 Hz, 1H, Ar<sub>m</sub>-H), 7.11 (d,  $J$  = 8.4 Hz, 1H, Ar<sub>m</sub>-H), 8.21 (s, 1H, OH).

$^{13}\text{C}$  NMR (100 MHz, acetone- $d_6$ ):  $\delta$  = 25.9, 35.4, 40.0, 43.4, 44.5, 48.0, 66.4, 105.1, 110.8, 114.0, 131.5, 157.5, 158.1, 177.4, 179.7, 208.0.

MS (EI, 70 eV):  $m/z$  (%) = 301 (100) [ $\text{M}^+$ ], 190 (24), 189 (32), 148 (22), 147 (37).

HRMS–EI:  $m/z$  [ $\text{M}^+$ ] calcd for C<sub>16</sub>H<sub>15</sub>NO<sub>5</sub>: 301.0950; found: 301.0950.

**26**{5,8}:  $R_f$  = 0.17

<sup>1</sup>H NMR (500 MHz, acetone-*d*<sub>6</sub>): δ = 2.77 (dd, *J* = 16.8, 8.3 Hz, 1H, CH<sub>2</sub>), 2.86 (dd, *J* = 16.8, 6.0 Hz, 1H, CH<sub>2</sub>), 2.89 (s, 3H, CH<sub>3</sub>), 3.74–3.81 (m, 1H, CH), 4.61 (bd, *J* = 7.9 Hz, 1H, CH), 4.64 (dd, *J* = 13.8, 2.0 Hz, 1H, OCH<sub>2</sub>), 4.96 (d, *J* = 13.8 Hz, 1H, OCH<sub>2</sub>), 6.36 (d, *J* = 2.4 Hz, 1H, Ar<sub>m</sub>-H), 6.58 (dd, *J* = 8.7, 2.4 Hz, 1H, Ar<sub>m</sub>-H), 7.72 (d, *J* = 8.7 Hz, 1H, Ar<sub>m</sub>-H), 9.16 (s, 1H, OH).

<sup>13</sup>C NMR (125 MHz, acetone-*d*<sub>6</sub>): δ = 26.3, 35.8, 39.9, 41.6, 64.6, 104.6, 111.2, 115.3, 125.0, 132.5, 142.5, 160.0, 163.6, 175.9, 179.3, 192.8.

MS (EI, 70 eV):  $m/z$  (%) = 299 (7) [M<sup>+</sup>], 242 (8), 213 (6), 150 (10), 141 (30), 101 (29), 59 (56), 43 (100).

HRMS–EI:  $m/z$  [ $M^+$ ] calcd for  $C_{16}H_{13}NO_5$ : 299.0794; found: 299.0795.

**Diisopropyl 8-hydroxy-4-oxo-3,4,4a,5-tetrahydro-1*H*-chromeno[4,3-*c*]pyridazine-1,2(10*bH*)-dicarboxylate (24{5,11}):**

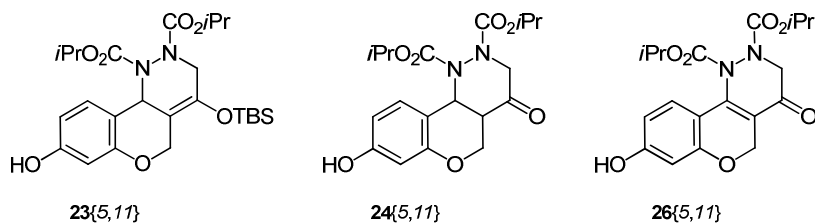

Yield for enol-ether formation, Diels-Alder and cleavage (THF/water): 20% of *exo*-**23**{5,8} and 12% of **24**{5,8} (*endo/exo* = 4:5), and 10% of **26**{5,8}.

Flash chromatography in cyclohexane/EtOAc (4:1) up to (2:1). TLC in the latter.

TBS-cleavage of **23**{5,11} gives 43% of **26**{5,11}.

**23{5,11}:  $R_f = 0.53$**

<sup>1</sup>H NMR (500 MHz, acetone-*d*<sub>6</sub>): δ = 0.22 (s, 6H, 2CH<sub>3</sub>), 0.99 (s, 9H, 3CH<sub>3</sub>), 1.20–1.35 (m, 12H, 4CH<sub>3</sub>), 3.74 (br. d, *J* = 6.2 Hz, 1H, CH<sub>2</sub>), 4.33 (br. d, *J* = 6.2 Hz, 1H, CH<sub>2</sub>), 4.47 (dd, *J* = 11.5, 1.6 Hz, 1H, OCH<sub>2</sub>), 4.73 (sept, *J* = 6.3 Hz, 1H, CH), 5.02 (sept, *J* = 6.2 Hz, 1H, CH), 5.07 (d, *J* = 11.5 Hz, 1H, OCH<sub>2</sub>), 5.81 (bs, 1H, CH), 6.20 (d, *J* = 2.4 Hz, 1H, Ar<sub>m</sub>-H), 6.40 (dd, *J* = 8.3, 2.4 Hz, 1H, Ar<sub>m</sub>-H), 7.24 (d, *J* = 8.3 Hz, 1H, Ar<sub>m</sub>-H), 8.23 (s, 1H, OH).

<sup>13</sup>C NMR (125 MHz, acetone-*d*<sub>6</sub>): δ = −3.2, −3.1, 19.7, 22.8, 23.2, 23.3 (2C), 26.9 (3C), 46.8, 54.3, 64.5, 71.5, 72.2, 104.4, 109.0, 109.5, 116.0, 130.5, 145.2, 156.0, 158.1, 159.9 (2C).



MS (EI, 70 eV):  $m/z$  (%) = 506 (76) [ $M^+$ ], 419 (100), 403 (41), 390 (78), 377 (39), 348 (76).

HRMS–EI:  $m/z$  [ $M^+$ ] calcd for  $C_{25}H_{38}N_2O_7Si$ : 506.2448; found: 506.2447.

**24**{5,11}:  $R_f$  = 0.26

$^1H$  NMR (500 MHz, acetone- $d_6$ ):  $\delta$  = 1.18–1.39 (m, 12H, 4CH<sub>3</sub>), 3.12–3.19 (m, 1H, CH), 4.86 (d,  $J$  = 17.0 Hz, 1H, CH<sub>2</sub>), 4.10 (dd,  $J$  = 11.5, 2.7 Hz, 1H, OCH<sub>2</sub>), 4.27 (d,  $J$  = 17.0 Hz, 1H, CH<sub>2</sub>), 4.73–4.85 (m, 2H, CH+OCH<sub>2</sub>), 5.04 (sept,  $J$  = 6.2 Hz, 1H, CH), 5.96 (d,  $J$  = 7.8 Hz, 1H, CH), 6.20 (d,  $J$  = 2.4 Hz, 1H, Ar<sub>m</sub>-H), 6.45 (dd,  $J$  = 8.5, 2.4 Hz, 1H, Ar<sub>m</sub>-H), 7.35 (d,  $J$  = 8.5 Hz, 1H, Ar<sub>m</sub>-H), 8.40 (s, 1H, OH).

$^{13}C$  NMR (125 MHz, acetone- $d_6$ ):  $\delta$  = 23.0, 23.1, 23.2, 23.4, 46.0, 53.7, 55.2, 65.2, 71.6, 72.7, 104.7, 110.9, 112.2, 132.0, 155.7, 159.0, 160.1 (2C), 201.7.

MS (EI, 70 eV):  $m/z$  (%) = 392 (19) [ $M^+$ ], 249 (17), 189 (18), 101 (32), 71 (34), 59 (56); 46 (77), 43 (100).

HRMS–EI:  $m/z$  [ $M^+$ ] calcd  $C_{19}H_{24}N_2O_7$ : 392.1584; found: 392.1581.

**26**{5,11}:  $R_f$  = 0.17.

$^1H$  NMR (400 MHz, acetone- $d_6$ ):  $\delta$  = 1.20 (s, 6H, 2CH<sub>3</sub>), 1.22 (s, 6H, 2CH<sub>3</sub>), 4.72–4.94 (m, 6H, CH<sub>2</sub>, OCH<sub>2</sub>, 2CH), 6.35 (d,  $J$  = 2.2 Hz, 1H, Ar<sub>m</sub>-H), 6.51 (dd,  $J$  = 8.3, 2.2 Hz, 1H, Ar<sub>m</sub>-H), 7.20 (d,  $J$  = 8.3 Hz, 1H, Ar<sub>m</sub>-H), 7.67 (s, 1H, OH).

$^{13}C$  NMR (100 MHz, acetone- $d_6$ ):  $\delta$  = 23.2 (4C), 56.7, 65.5, 71.5, 71.6, 104.7, 111.7, 115.1, 126.5, 133.1, 136.4, 157.5, 159.4, 163.8 (2C), 193.4.

MS (EI, 70 eV):  $m/z$  (%) = 322 (5), 379 (11), 205 (10), 191 (16), 166 (13), 149 (45), 101 (21), 83 (31), 71 (49), 57 (43), 43 (100). No [ $M^+$ ] detected.

**2-Allyl-2-methyl-2H-chromen-7-ol: Side Product from DOMA Condensation after Wittig Reaction:**

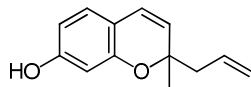

Flash chromatography in cyclohexane/EtOAc (4:1).  $R_f$  = 0.42

Isolated from the **21**{2,X} series in amounts between 5–10%.

IR (ATR):  $\nu$  = 3382, 3076, 2978, 2929, 1701, 1618, 1505, 1456, 1302, 1216, 1155, 1118, 1042.

$^1\text{H}$  NMR (250 MHz, acetone- $d_6$ ):  $\delta$  = 1.34 (s, 3H,  $\text{CH}_3$ ), 2.42 (bdd,  $J$  = 7.1, 1.1 Hz, 2H,  $\text{CH}_2$ ), 5.03 (t,  $J$  = 1.1 Hz, 1H, =CH), 5.06–5.12 (m, 1H, =CH), 5.48 (d,  $J$  = 9.8 Hz, 1H, =CH), 5.87 (qt,  $J$  = 10.3, 7.2 Hz, 1H, =CH), 6.26 (bd,  $J$  = 2.4 Hz, 1H,  $\text{Ar}_m\text{-H}$ ), 6.33 (dd,  $J$  = 8.1, 2.4 Hz, 1H,  $\text{Ar}_m\text{-H}$ ), 6.35 (bd,  $J$  = 9.8 Hz, 1H, =CH), 6.85 (d,  $J$  = 8.1 Hz, 1H,  $\text{Ar}_m\text{-H}$ ), 8.40 (s, 1H, OH).

$^{13}\text{C}$  NMR (125 MHz, acetone- $d_6$ ):  $\delta$  = 27.2, 46.9, 79.6, 105.1, 109.6, 115.6, 119.3, 124.4, 127.8, 129.0, 135.3, 156.2, 160.5.

MS (EI, 70 eV):  $m/z$  (%) = 202 (2) [ $\text{M}^+$ ], 161 (100) [ $\text{C}_{10}\text{H}_9\text{O}_2$ ].

HRMS–EI:  $m/z$  [ $\text{M}^+$ ] calcd for  $\text{C}_{13}\text{H}_{14}\text{O}_2$ : 202.0994; found: 202.0993.

## References:

- [1] Modified according to: Zhang, S.; Zhen, J.; Reith, M. E. A.; Dutta, A. K. *Bioorg. Med. Chem.* **2006**, *14*, 3953.
- [2] Yu, X.; Wang, S.; Chen, F. *J. Comb. Chem.* **2008**, *10*, 605.
- [3] Uchiyama, M.; Ozawa, H.; Takuma, K.; Matsumoto, Y.; Yonehara, M.; Hiroya, K.; Sakamoto, T. *Org. Lett.* **2006**, *8*, 5517.
- [4] Bajwa, M.; Jennings, M. P. *J. Org. Chem.* **2006**, *71*, 3646.
- [5] Burke, T. R. Jr.; Nelson, W. L. *J. Med. Chem.* **1979**, *22*, 1535.
- [6] Oh, S.; Jang, H. J.; Ko, S. K.; Ko, Y.; Park, S. B. *J. Comb. Chem.* **2010**, *12*, 548–558.

THP-Linker 4:

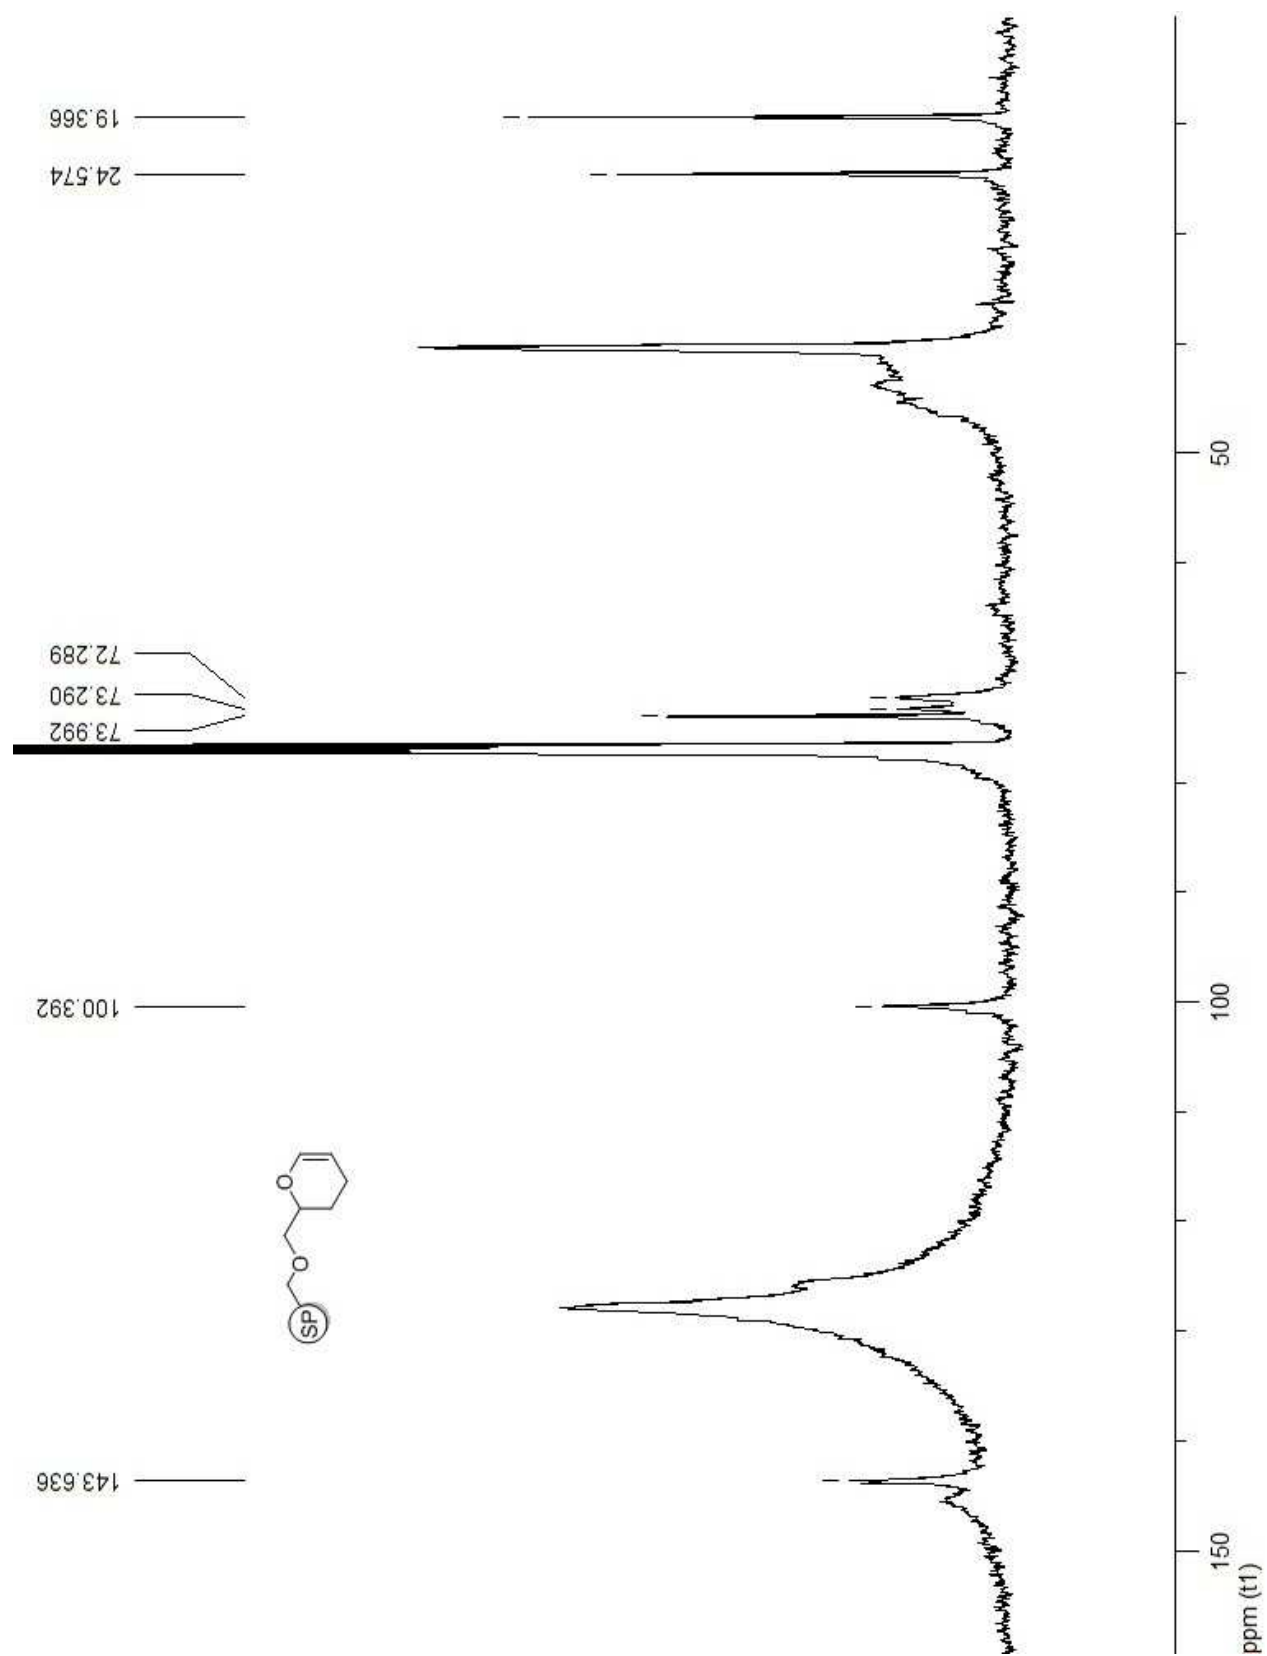

2-Hydroxy-4-[(tetrahydro-2H-pyran-2-yl)oxy]benzaldehyde and immobilized 4-HSA **5**:

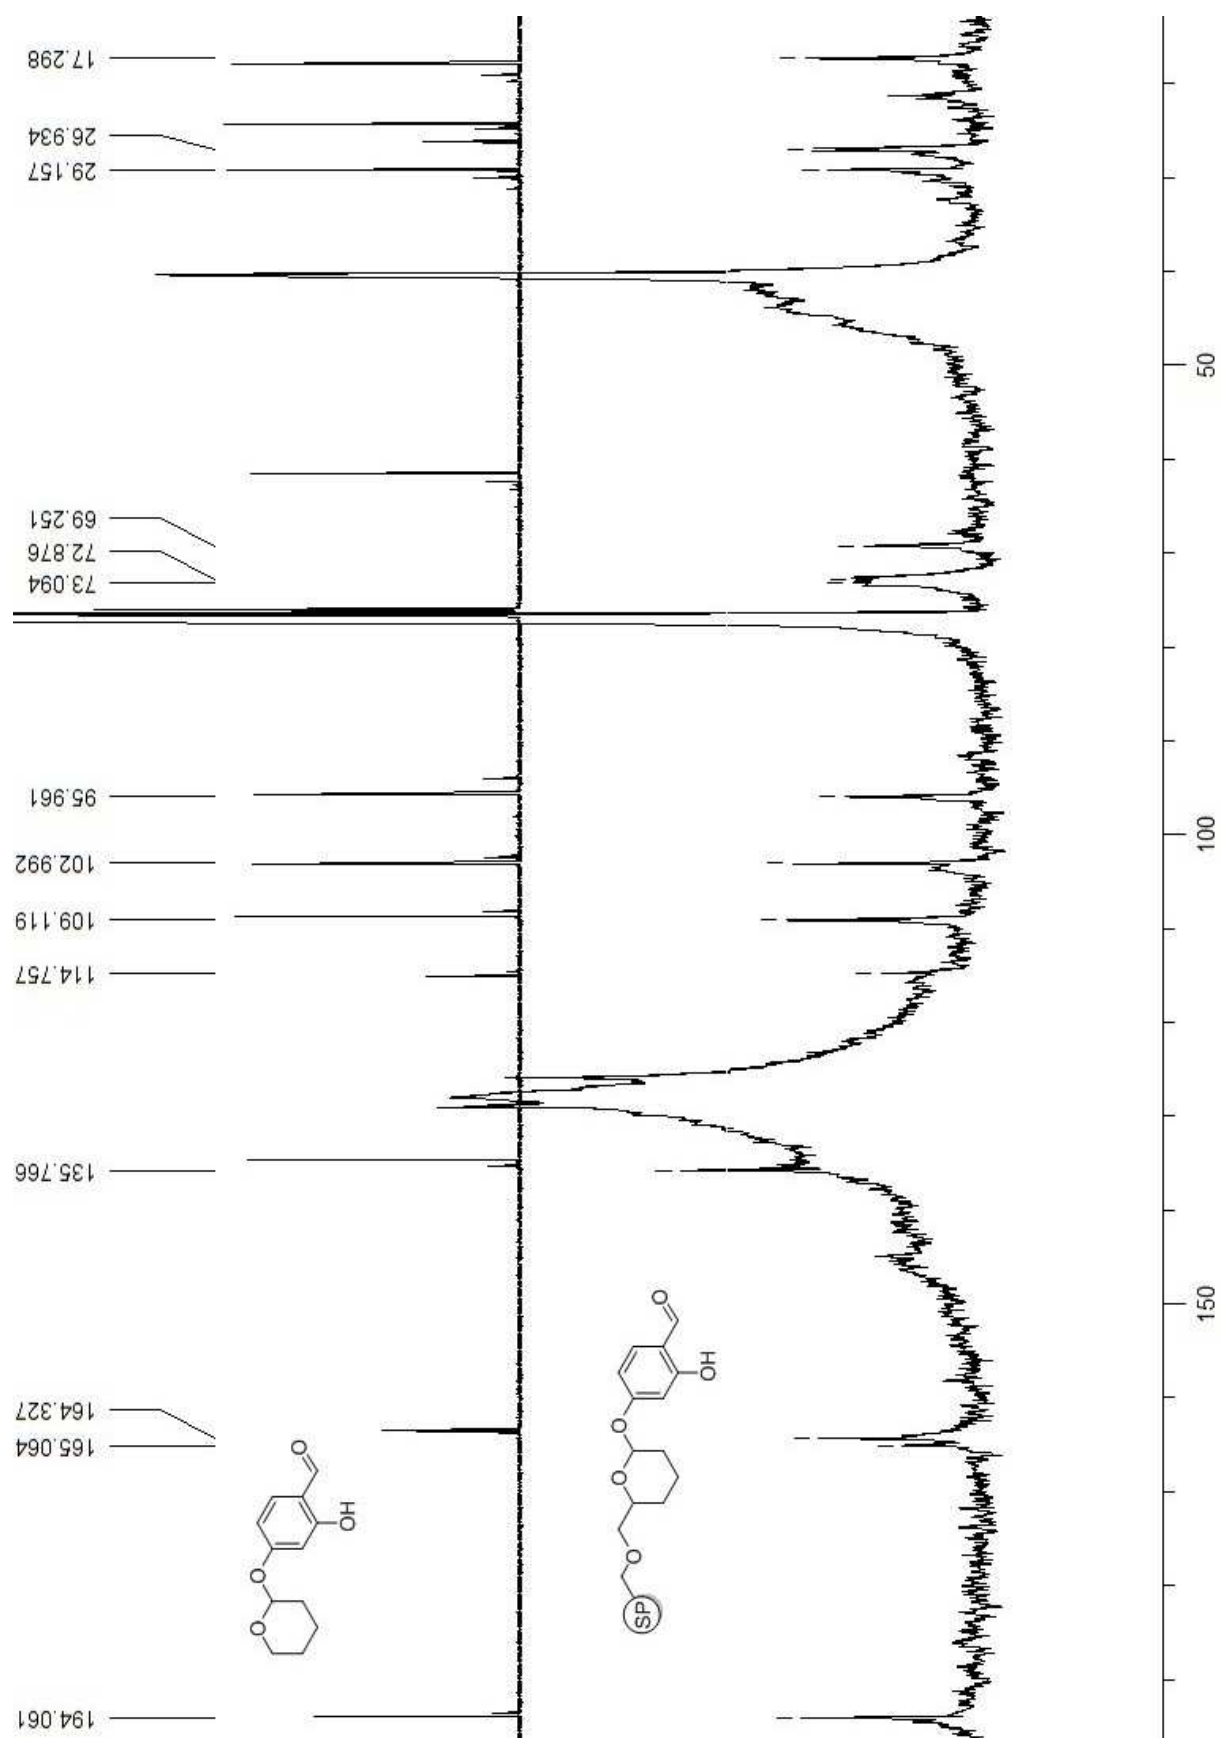

Immobilized 6-HSA **6**: (Peak at 53.31 = CH<sub>2</sub>Cl<sub>2</sub>)

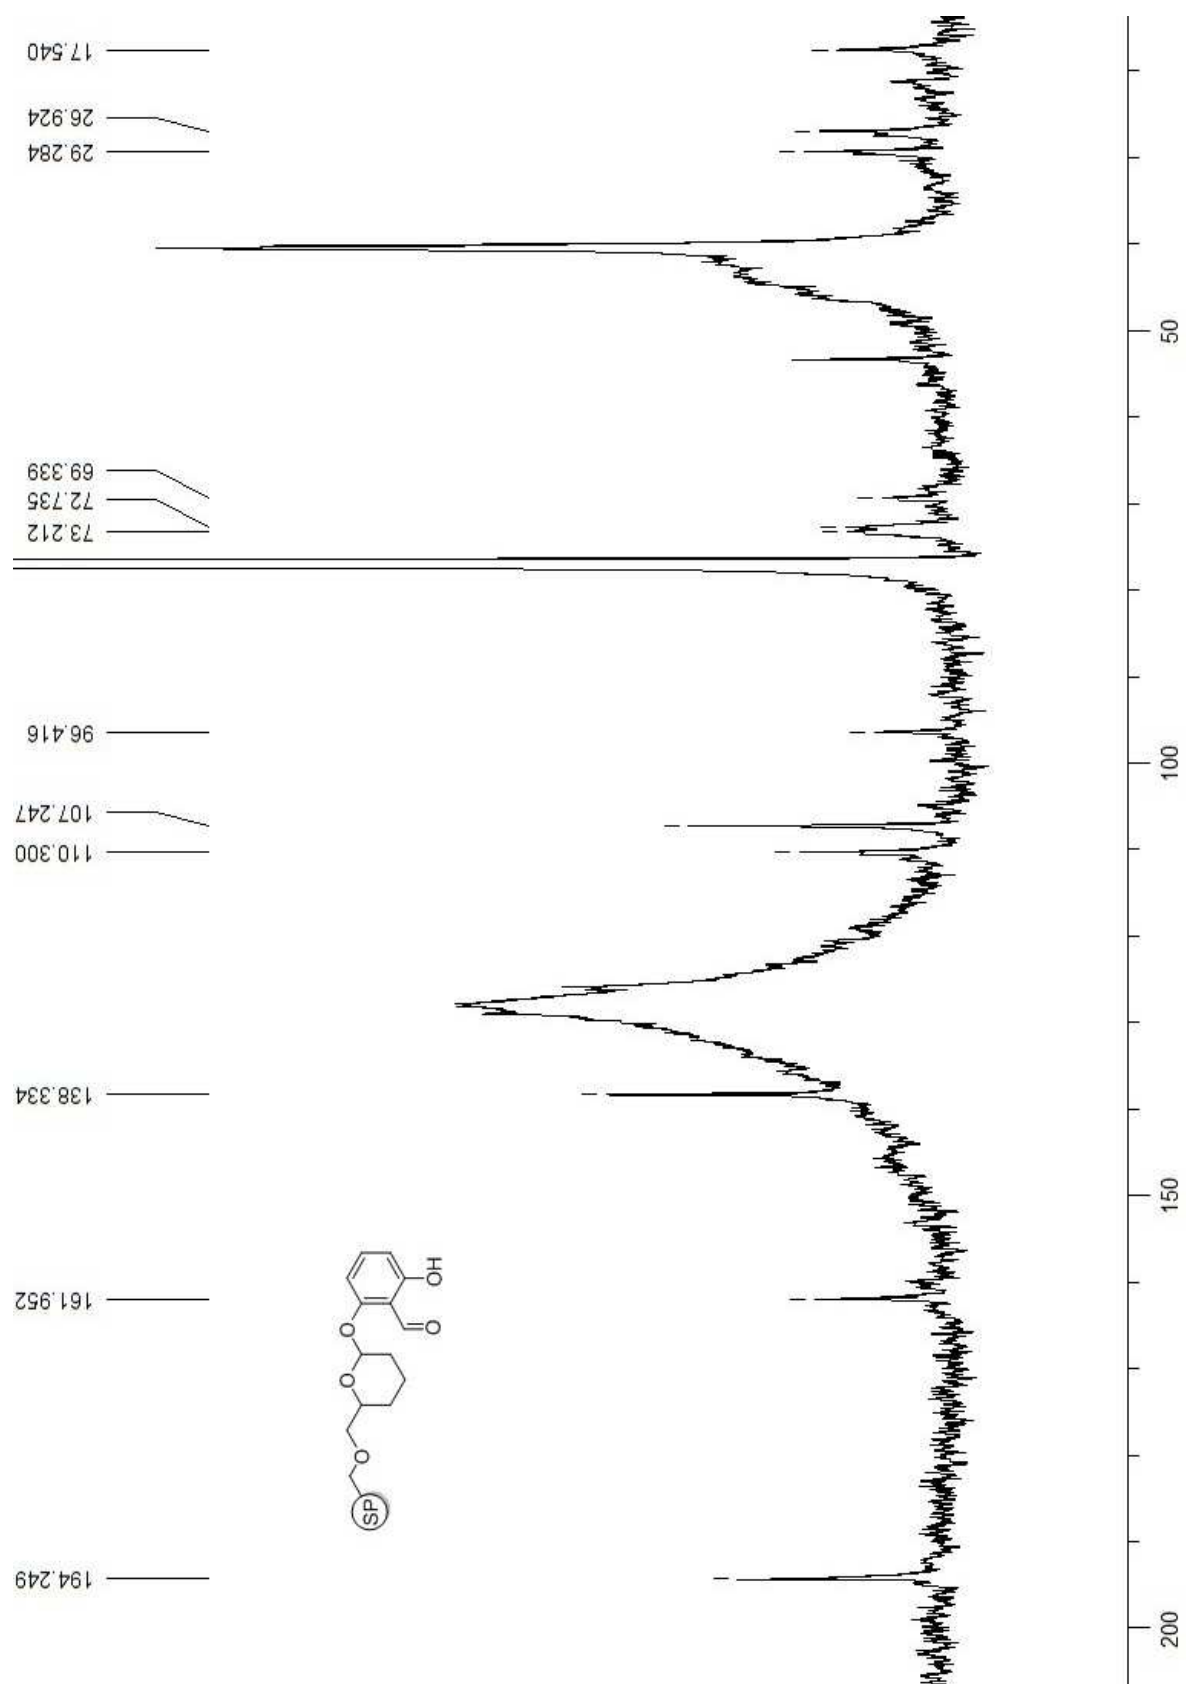

DOMA: **11**{*I*} and **8**{*I*}: (Peak at 53.31 = CH<sub>2</sub>Cl<sub>2</sub>)

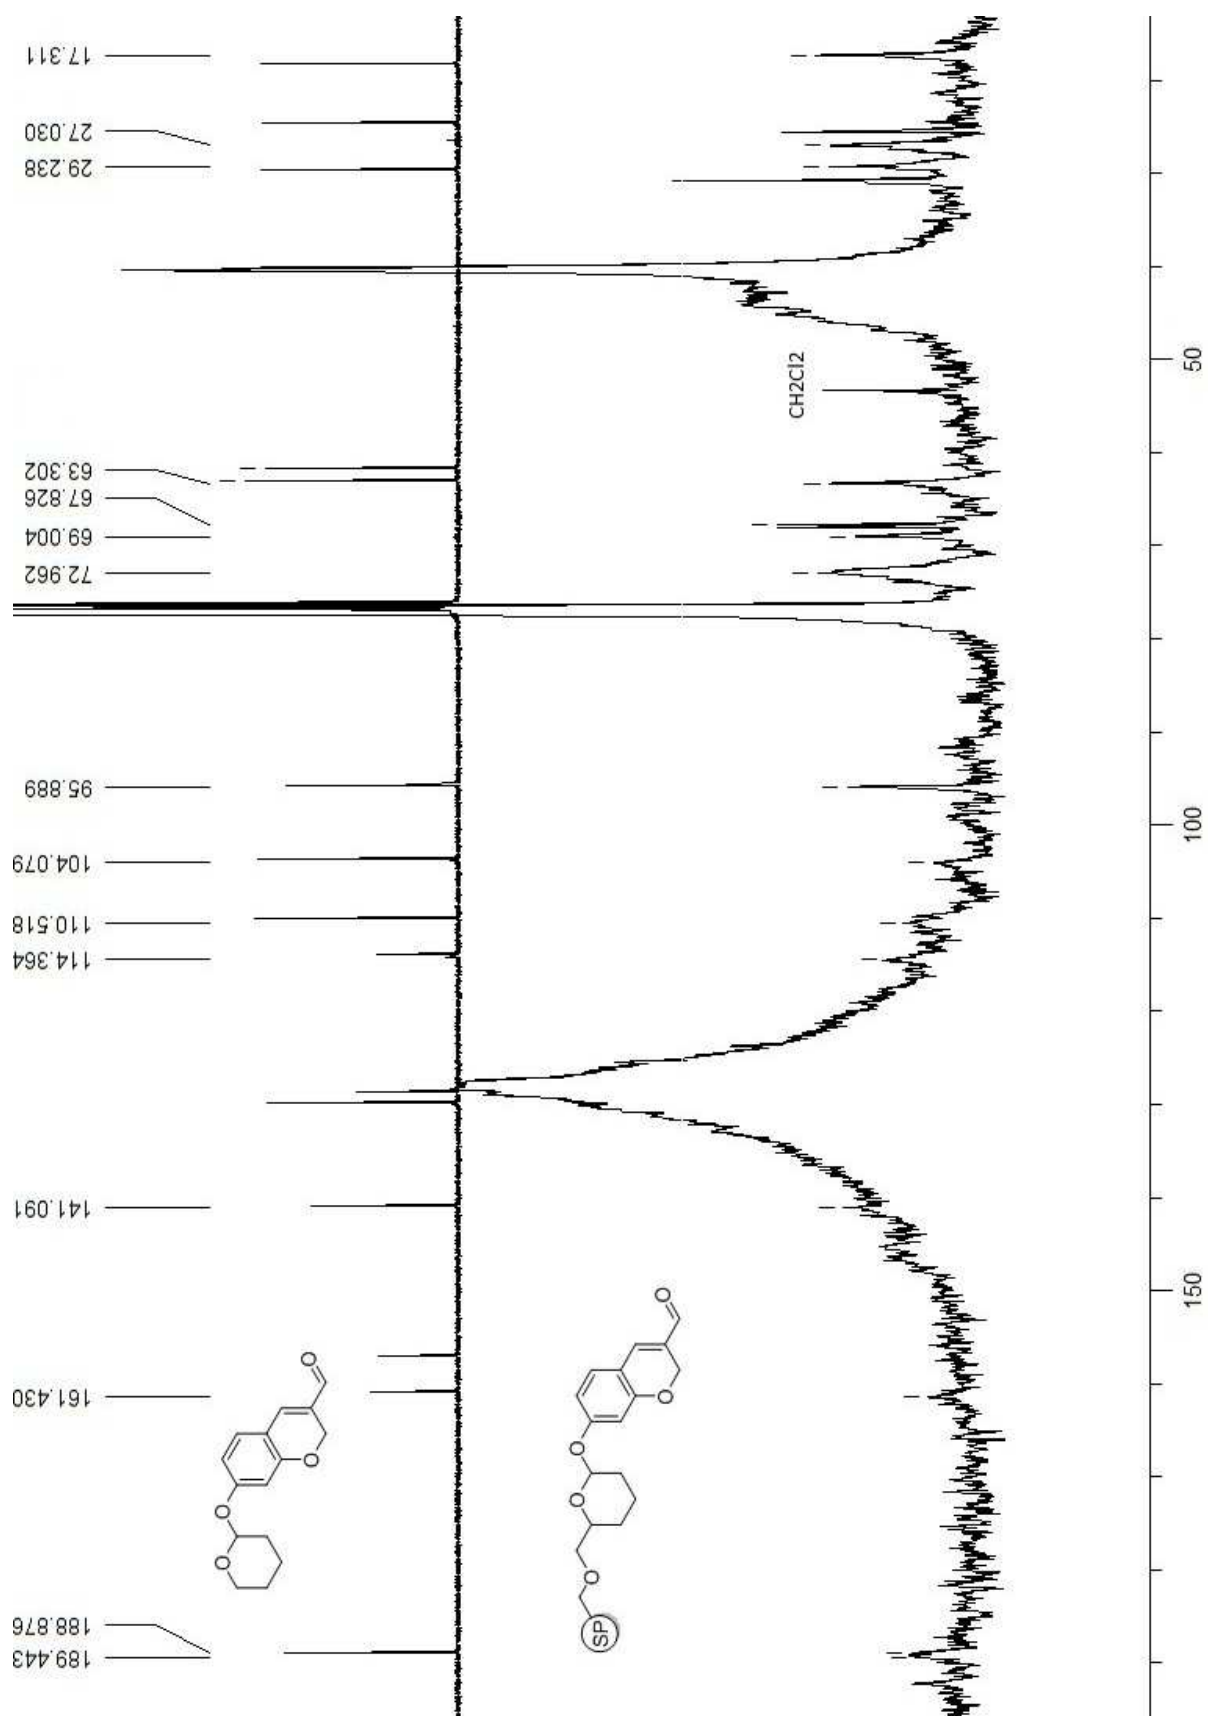

DOMA: **11**{2} and **8**{2}:

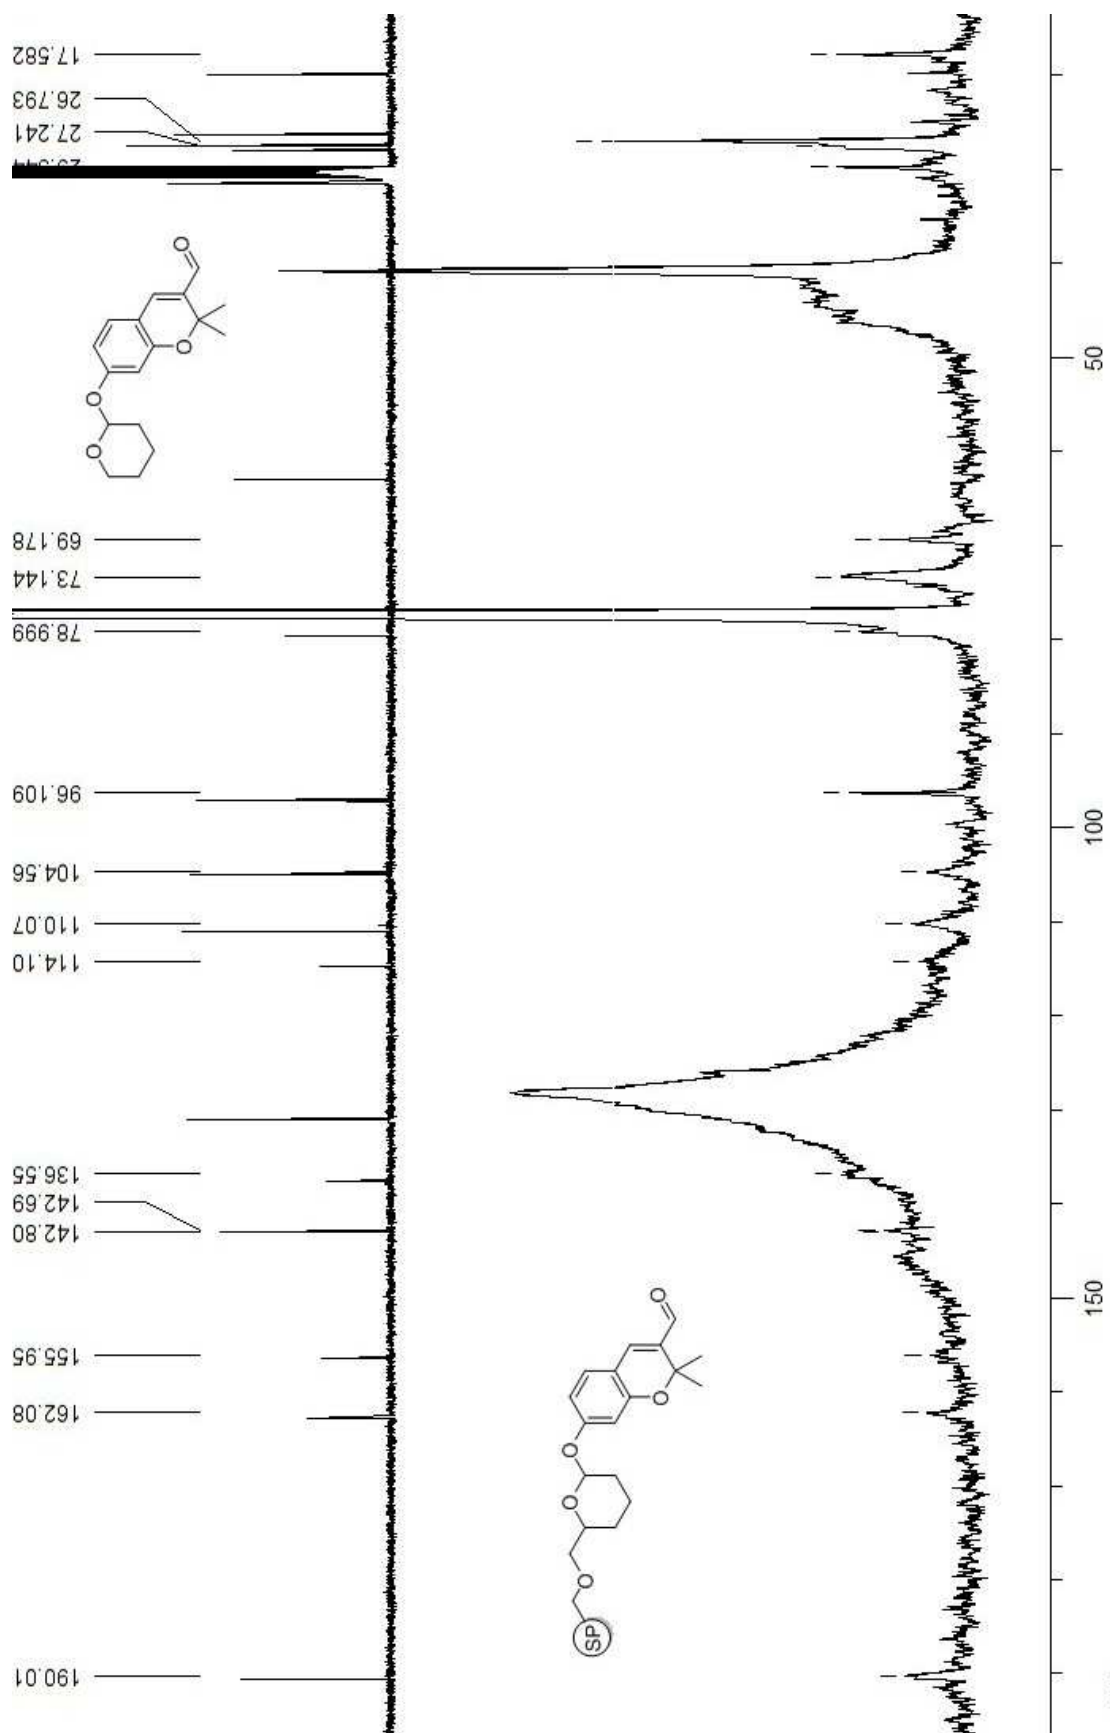



DOMA: **11**{3} and **8**{3}:

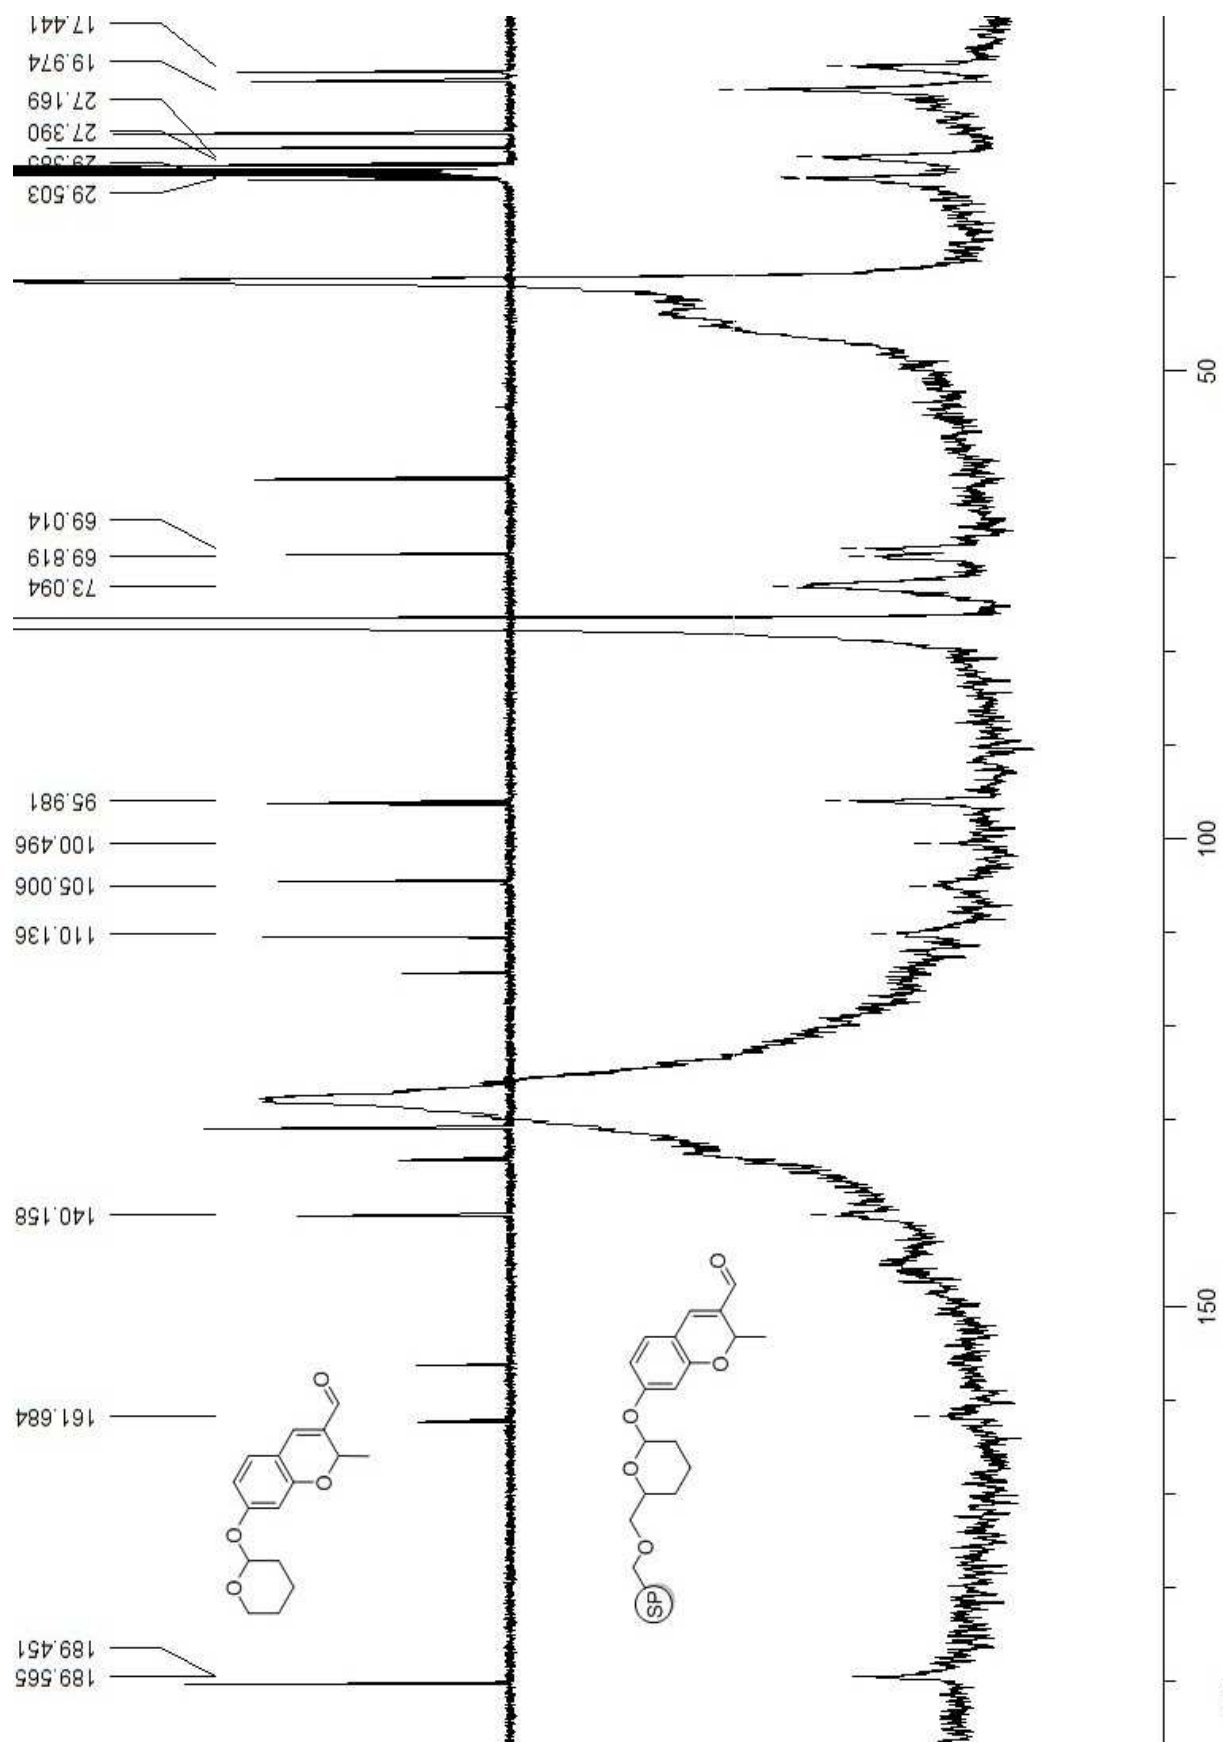

Wittig: **17**{*I*} and **16**{*I*}: (Peak at 53.31 = CH<sub>2</sub>Cl<sub>2</sub>)

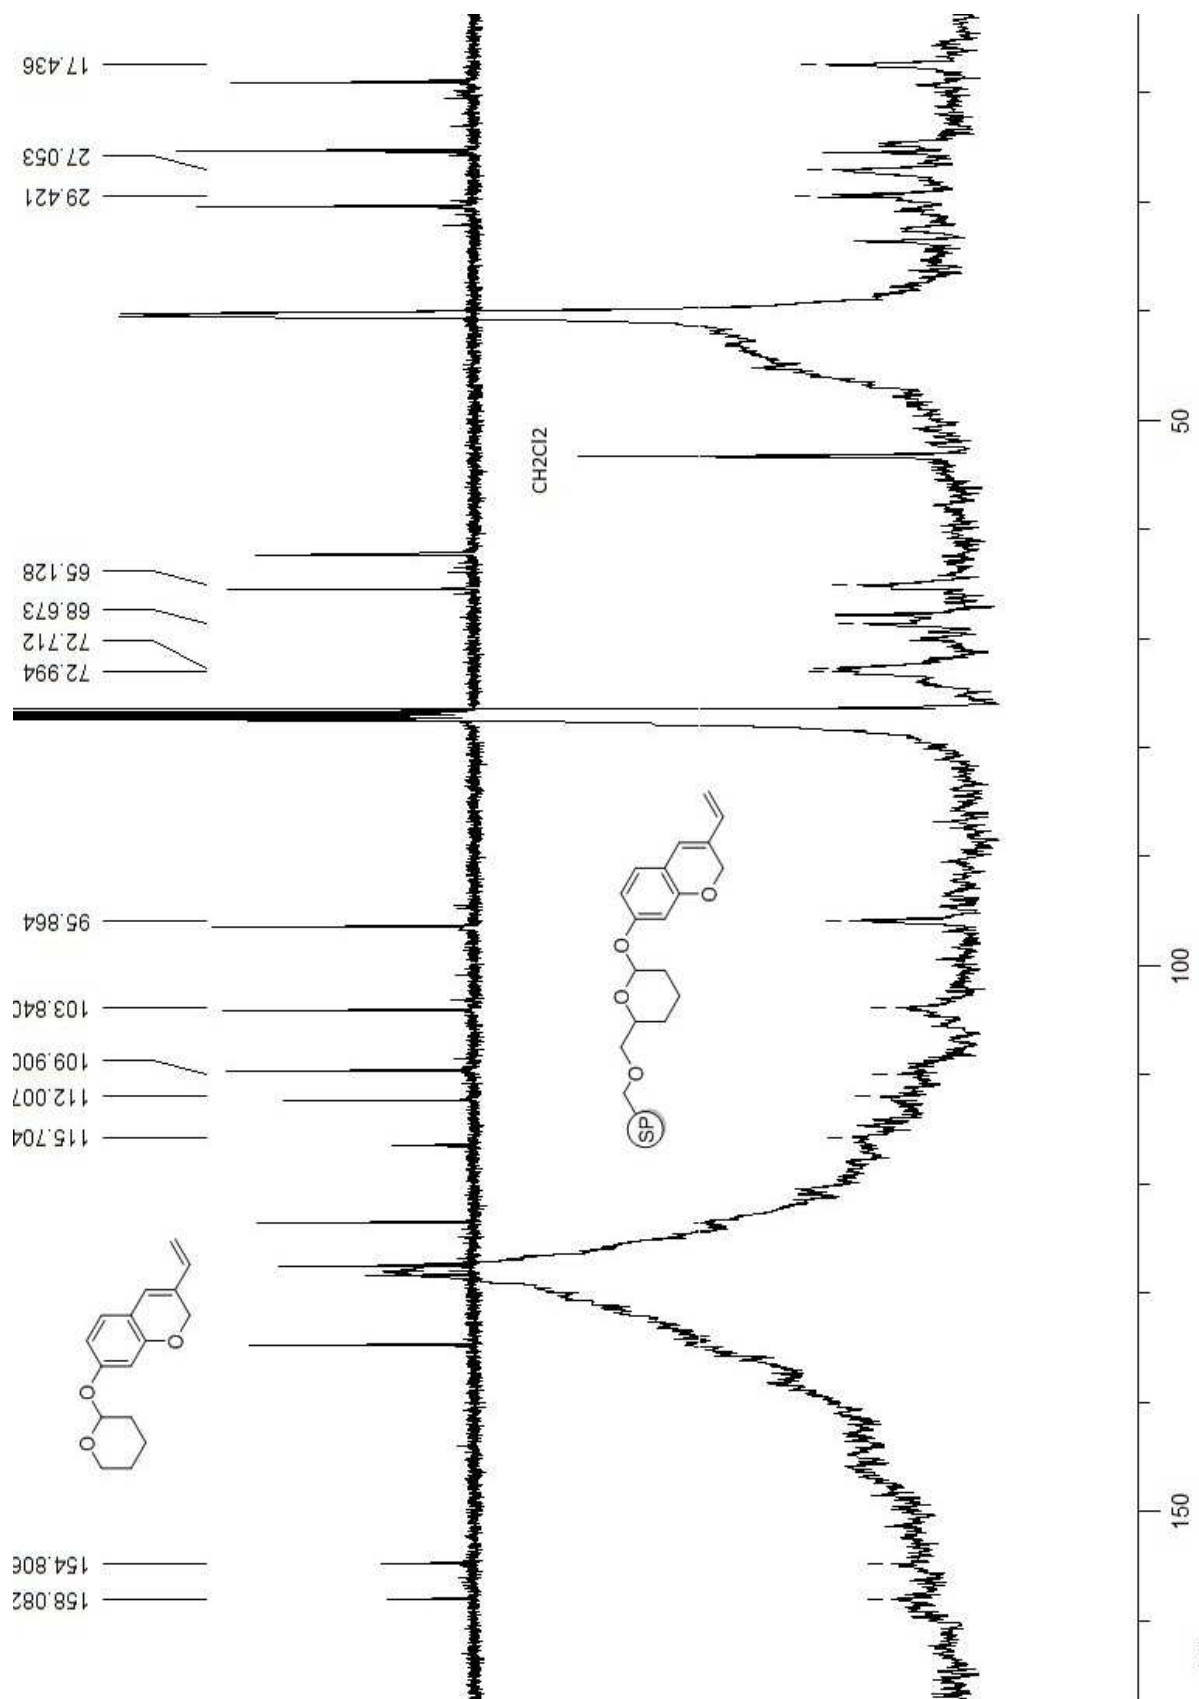

Wittig: **8**{*I*} to **16**{*I*}:

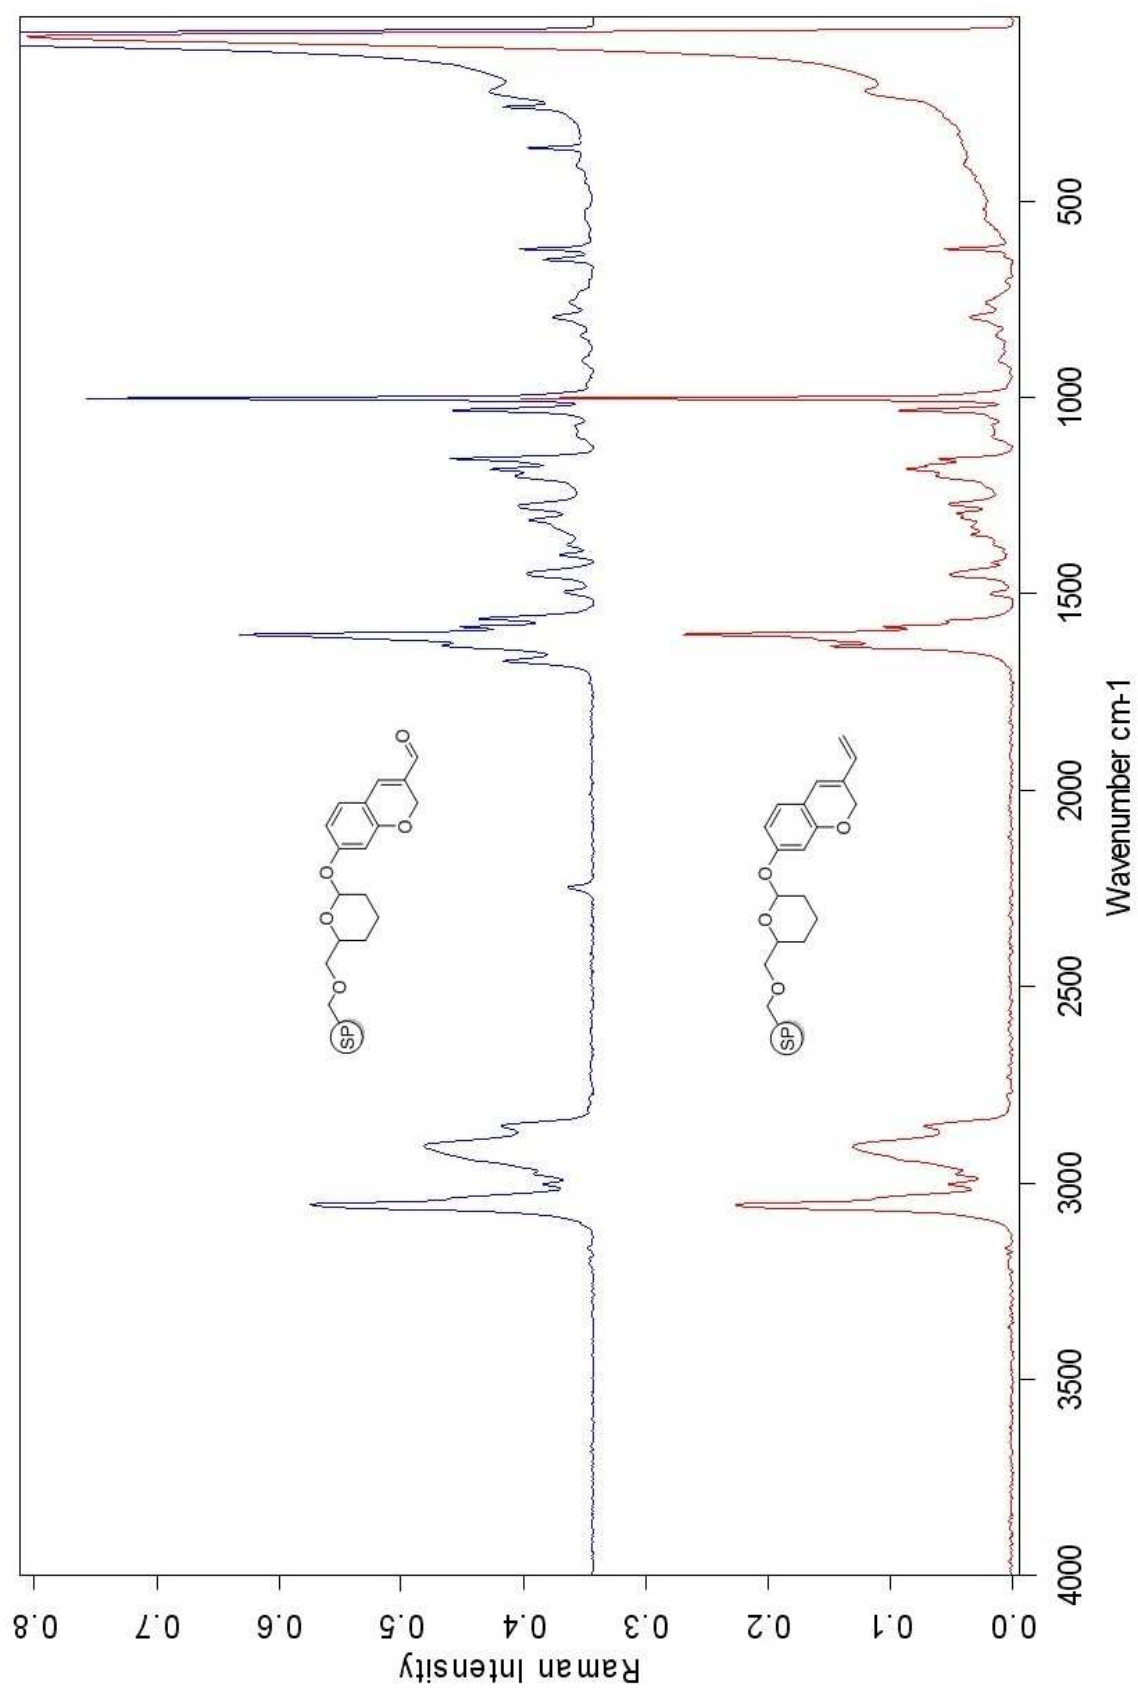

| Year | Number of people (millions) |
|------|-----------------------------|
| 1990 | 17,502                      |
| 2000 | 26,609                      |
| 2010 | 27,209                      |
| 2020 | 29,526                      |

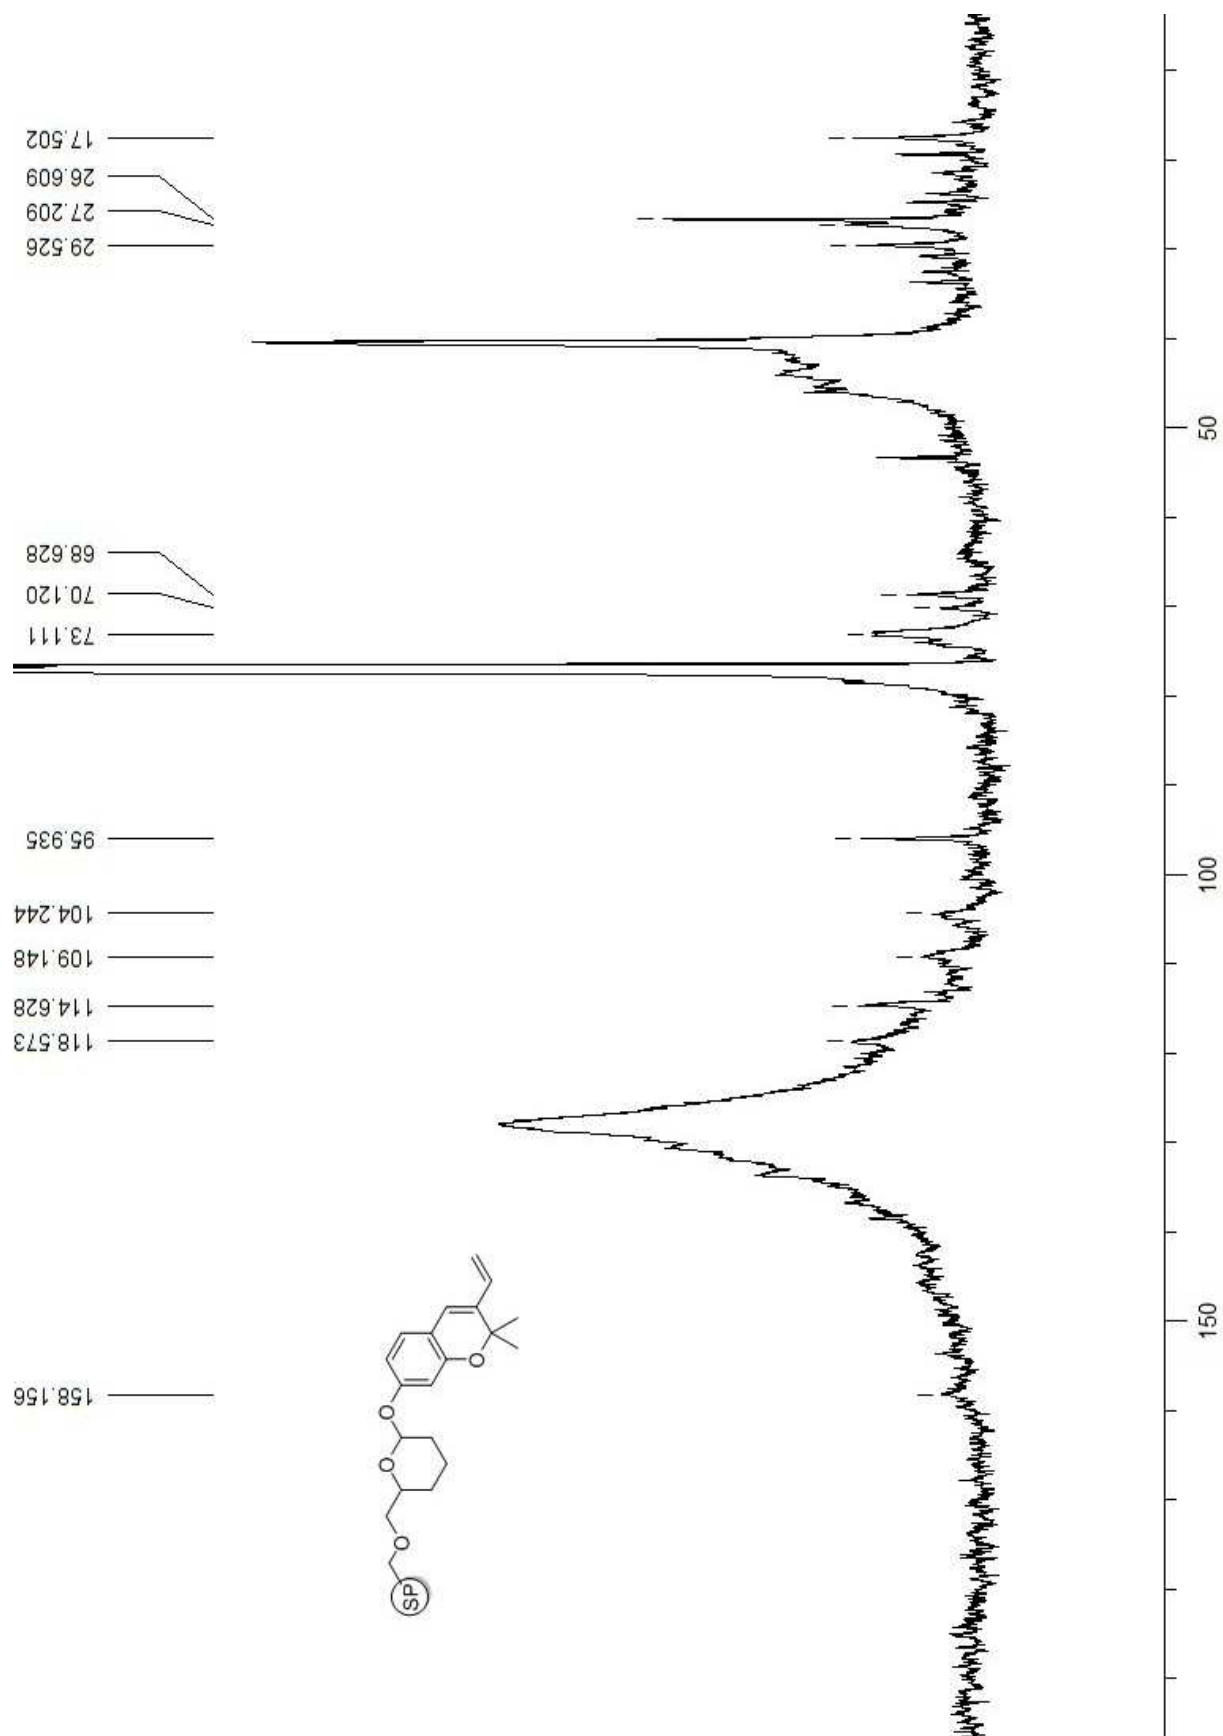

Wittig: **8**{2} to **16**{2}:

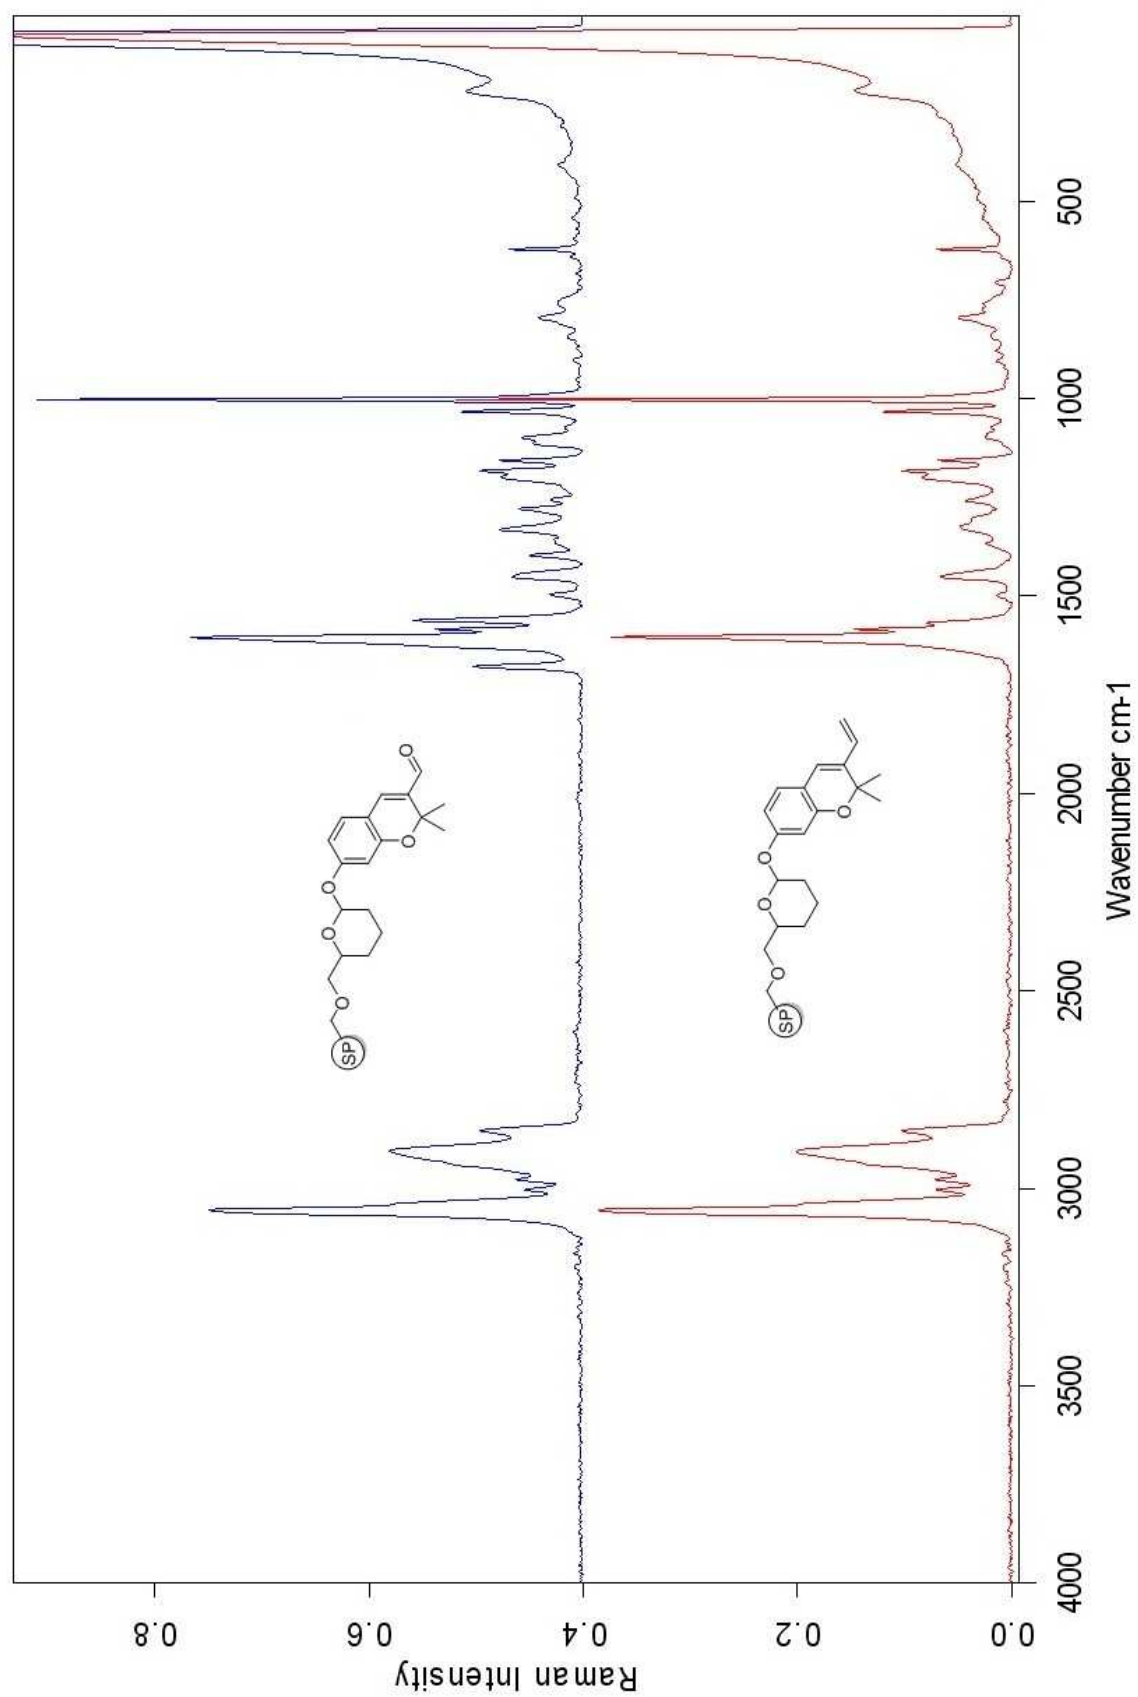

Enol-Ether: **8**{5} to **11**{5}:

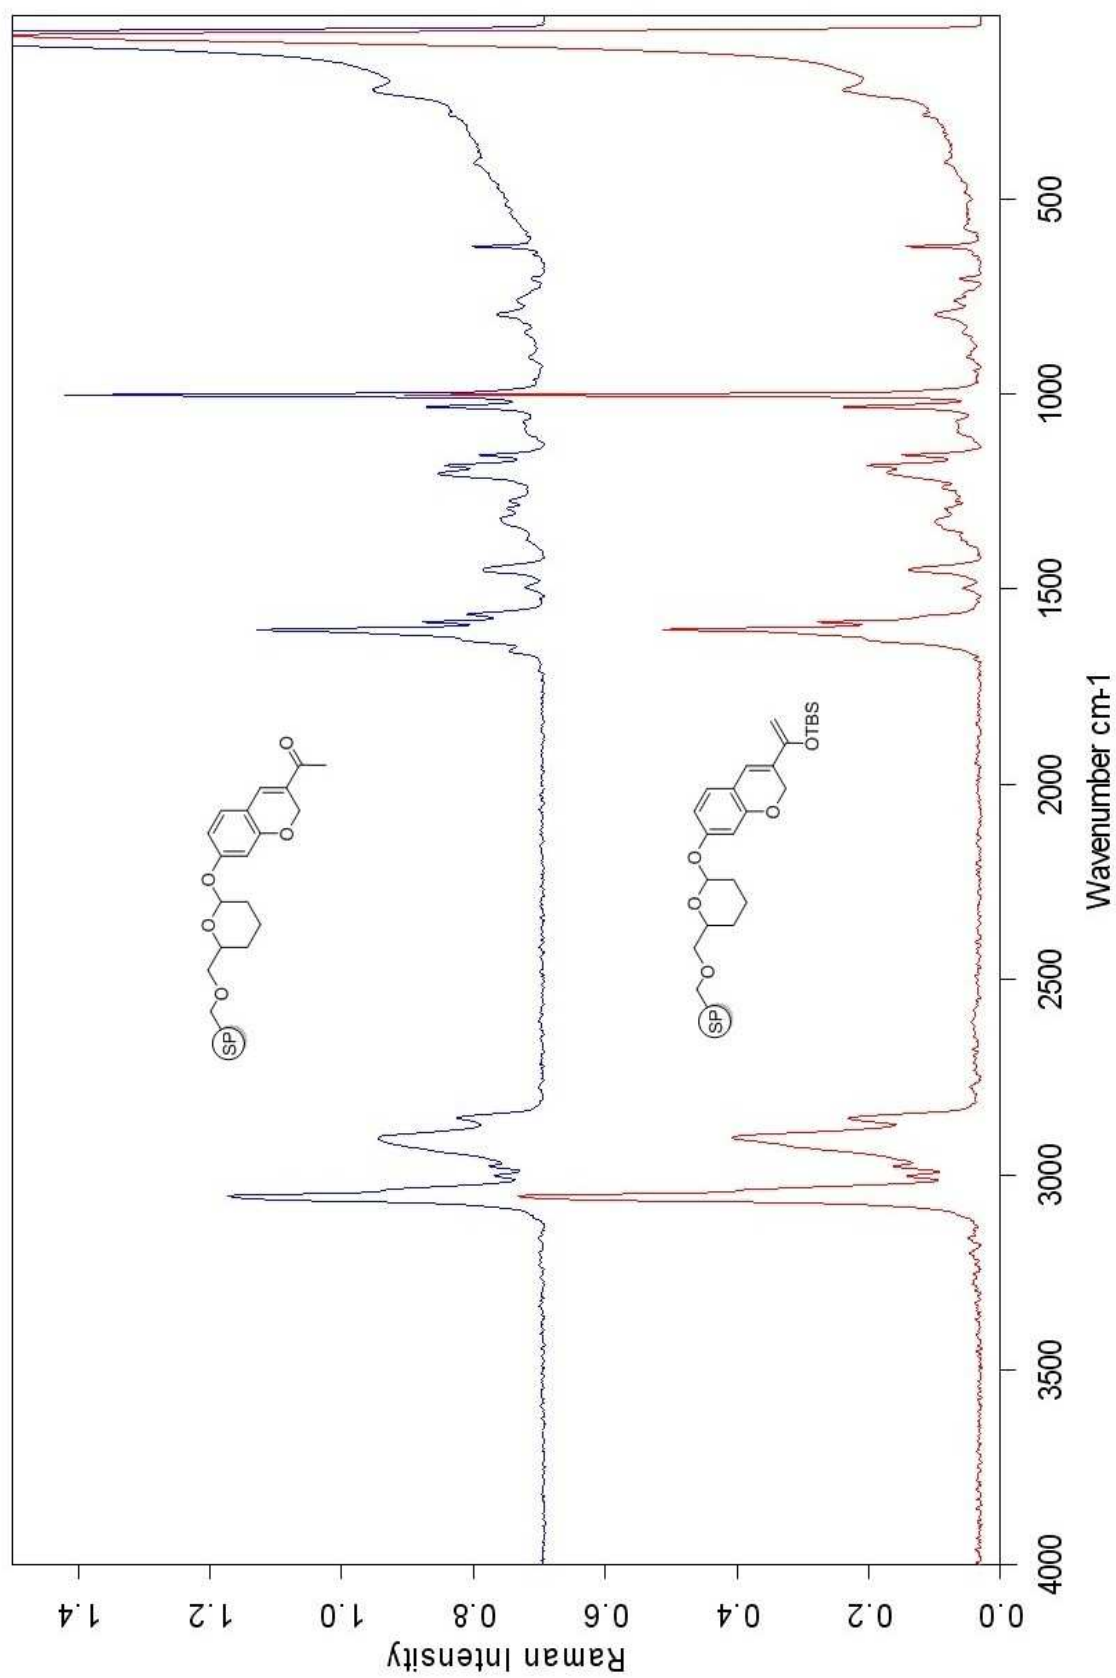

**21{1,3}:**

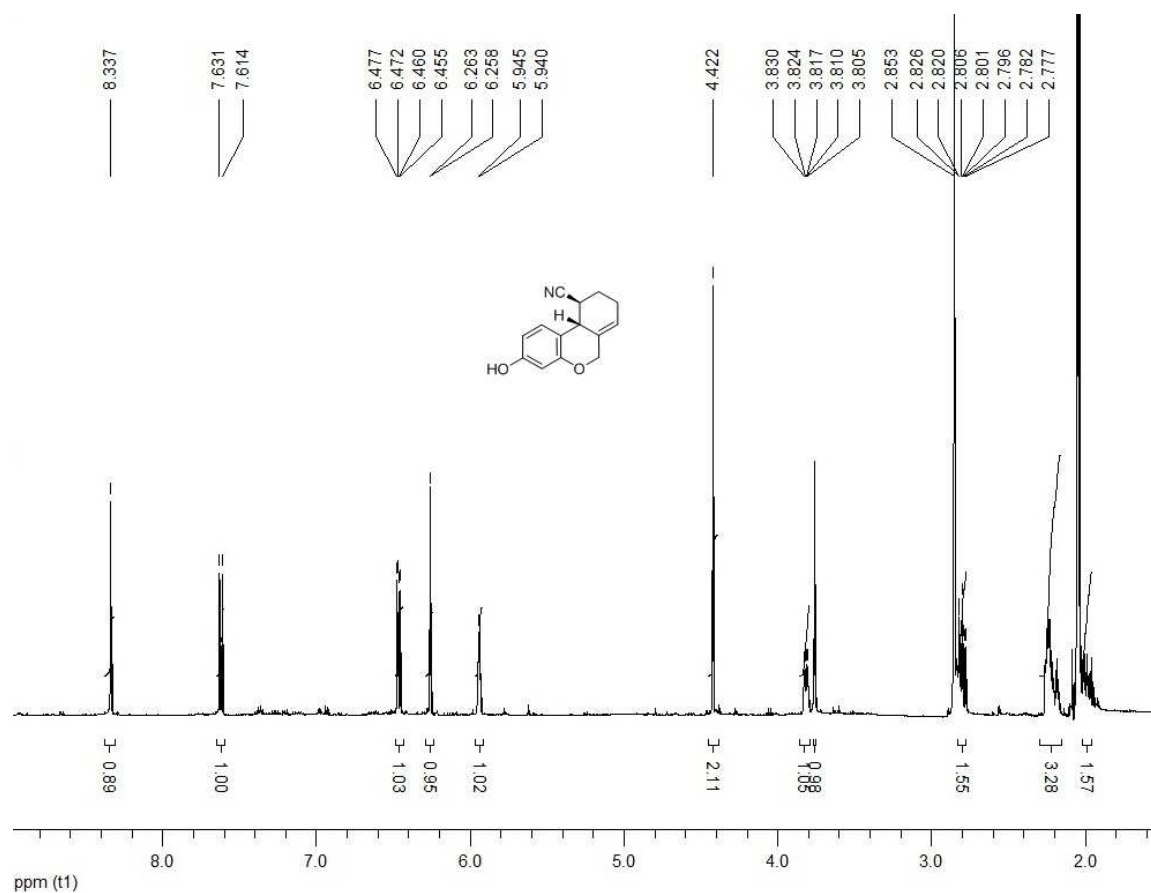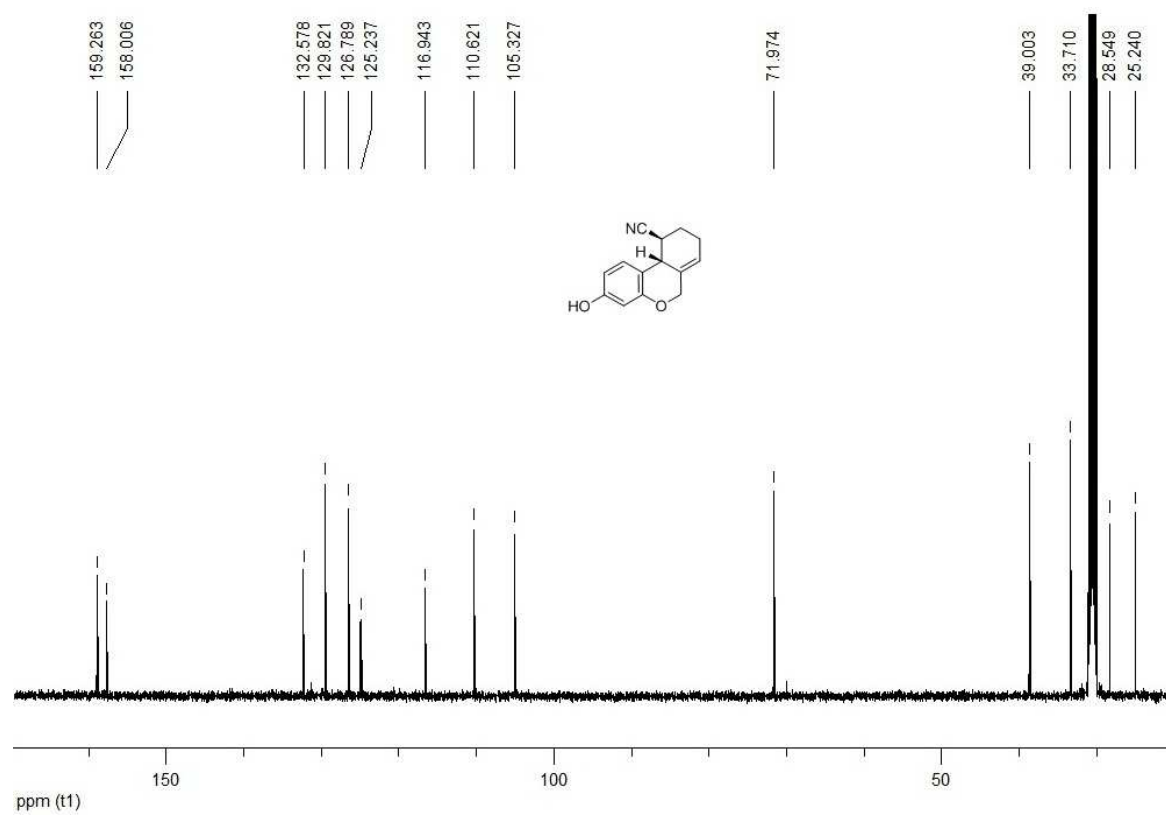

21{2,2}:

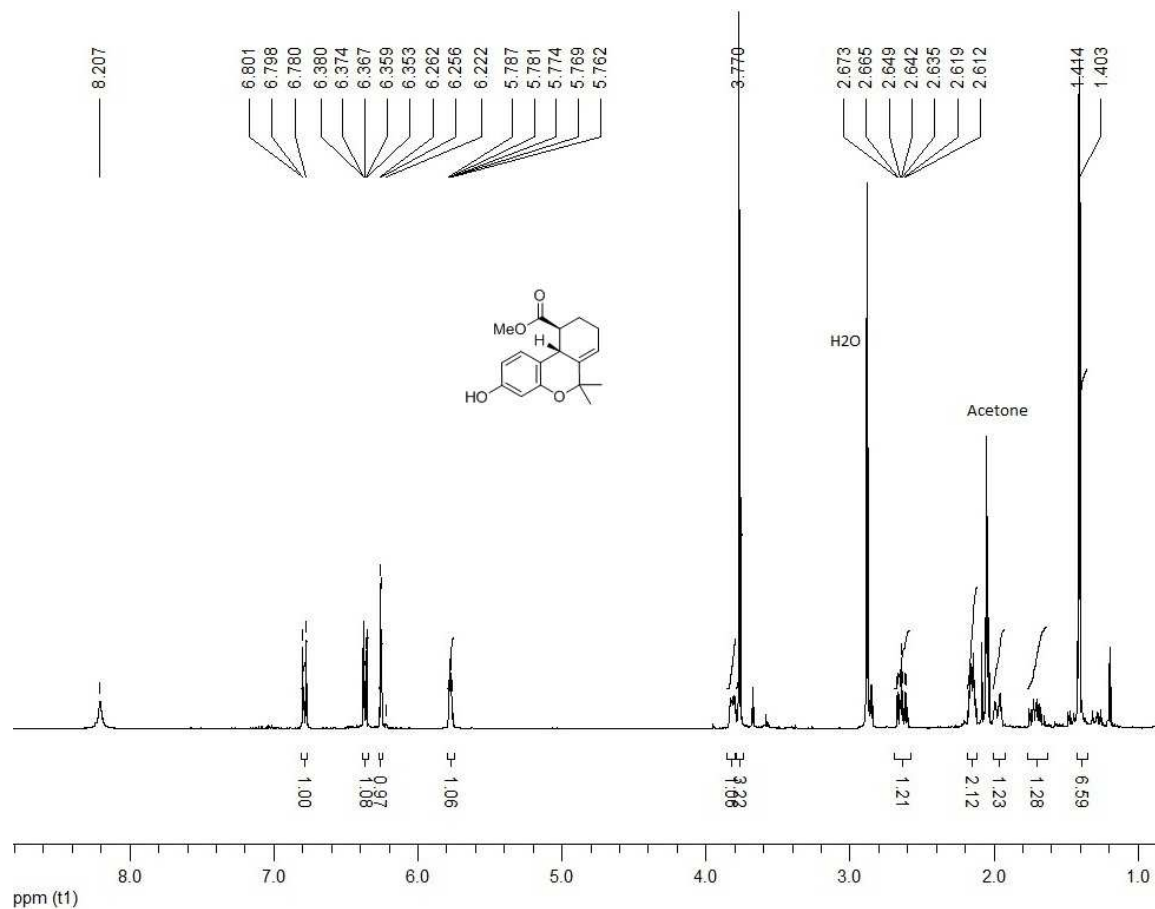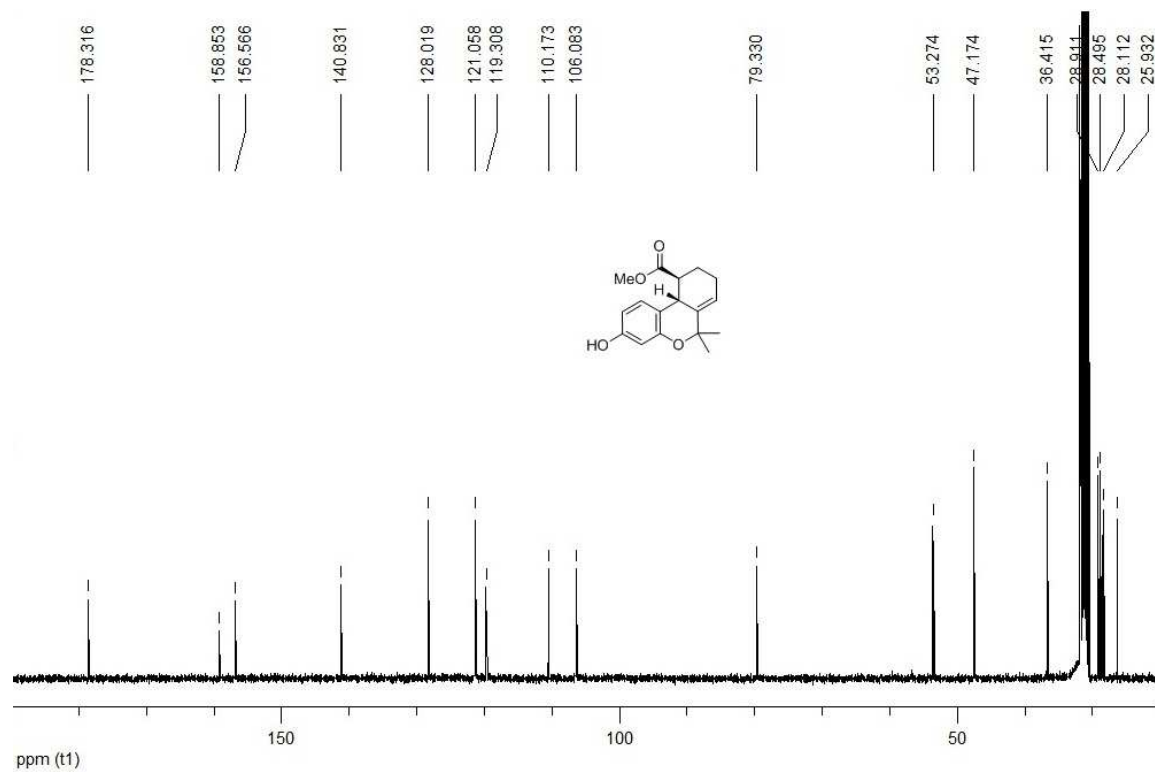



**21{2,3}:**

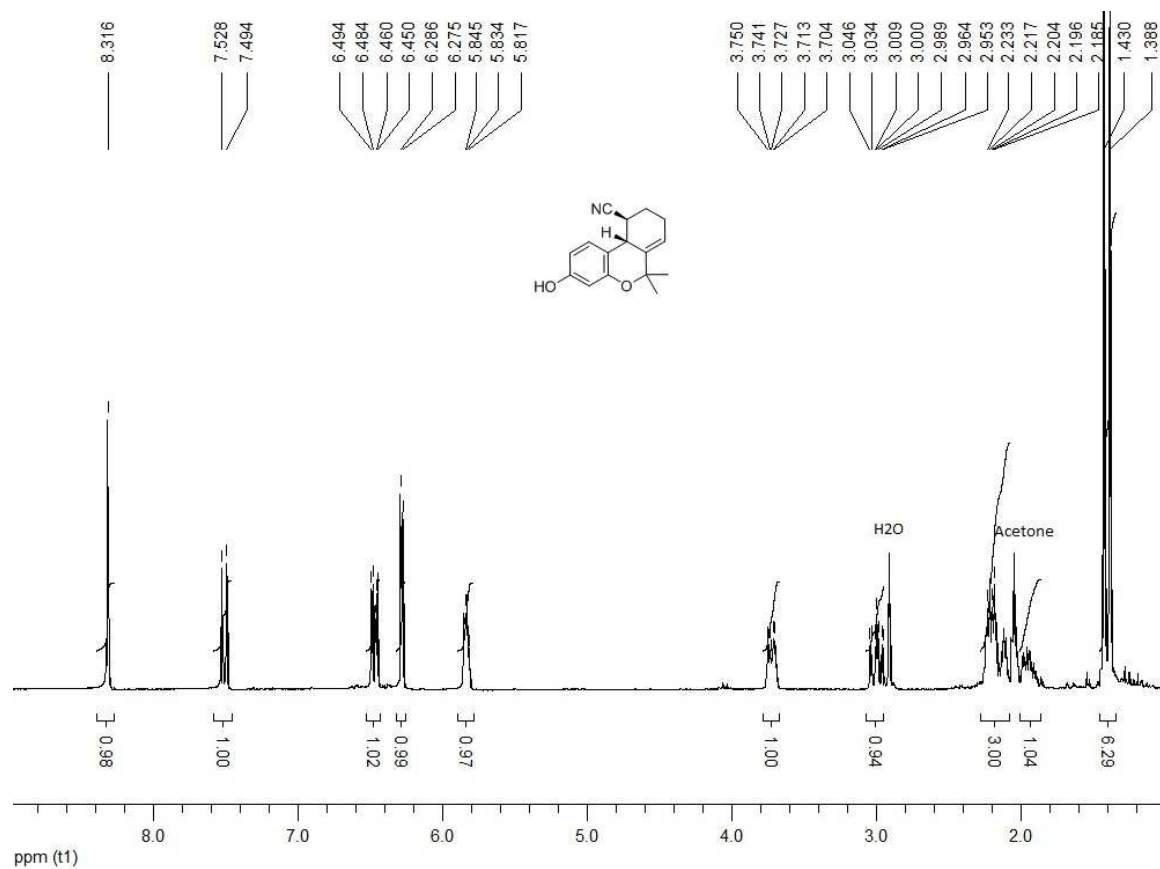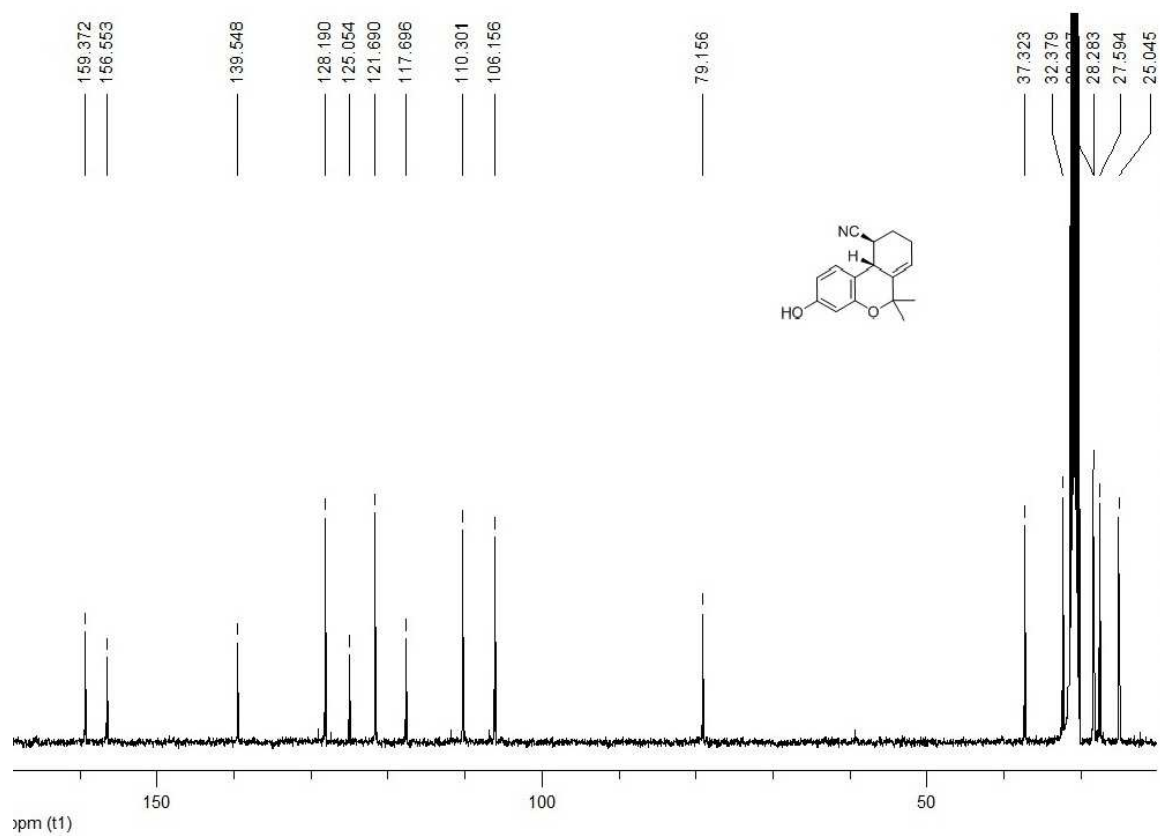

21{2,7}:

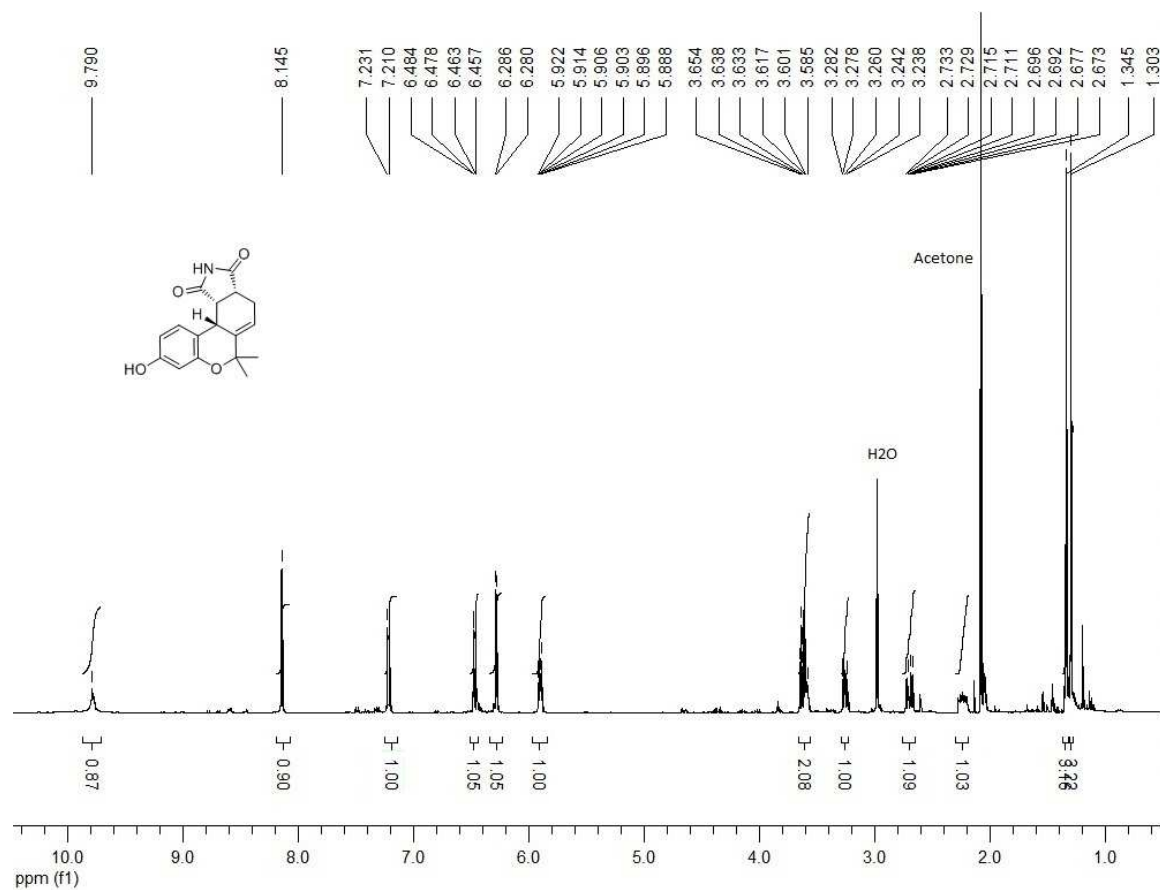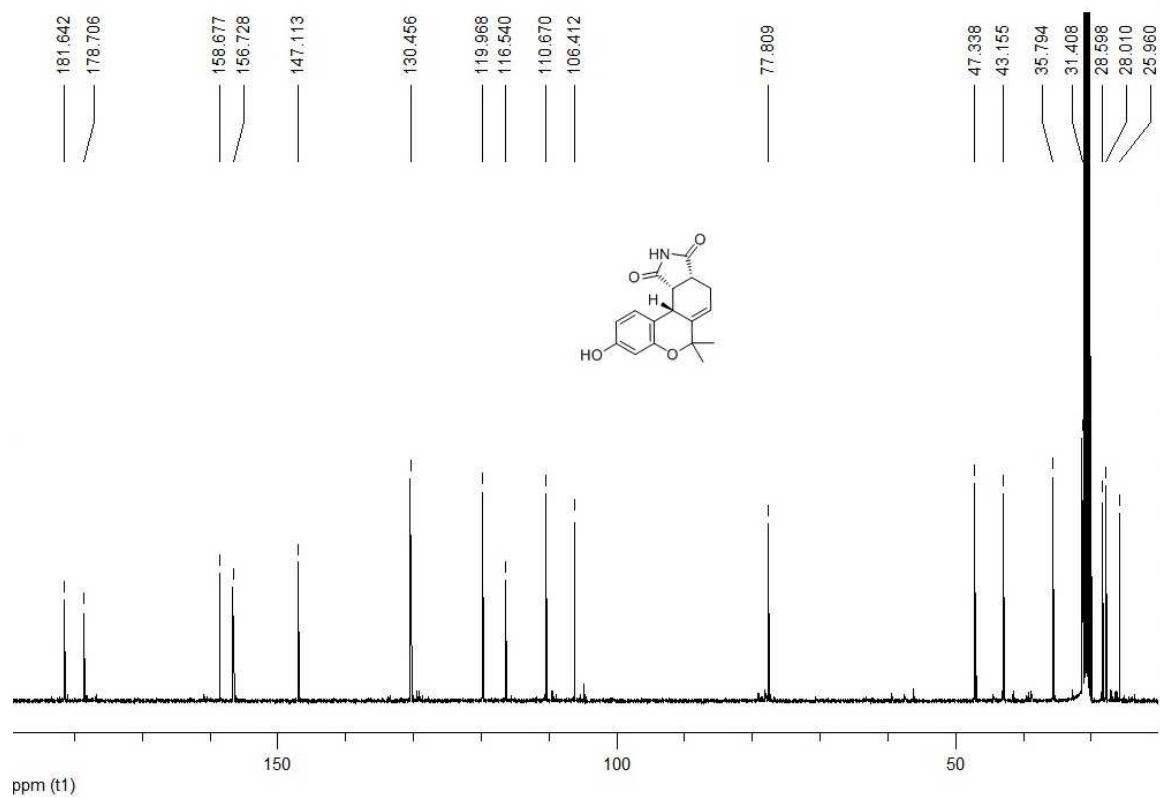

21{2,10}:

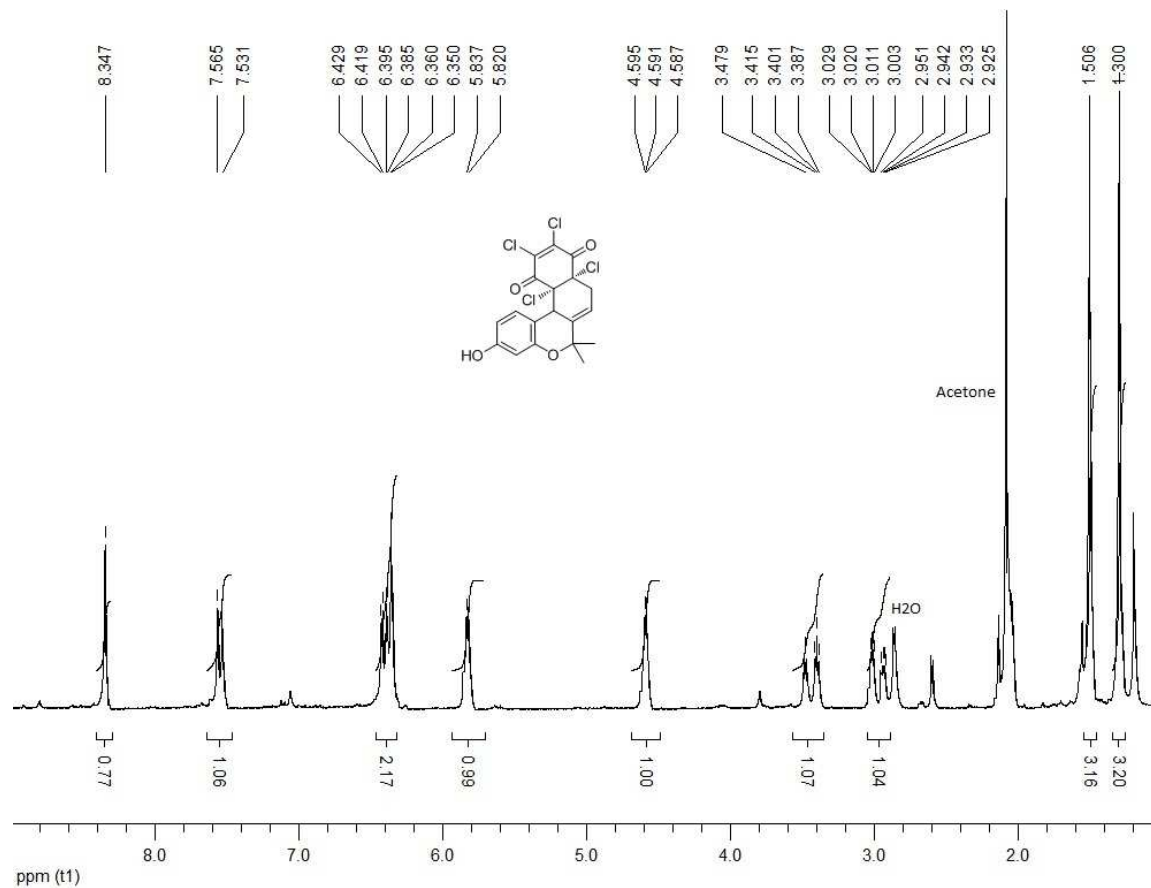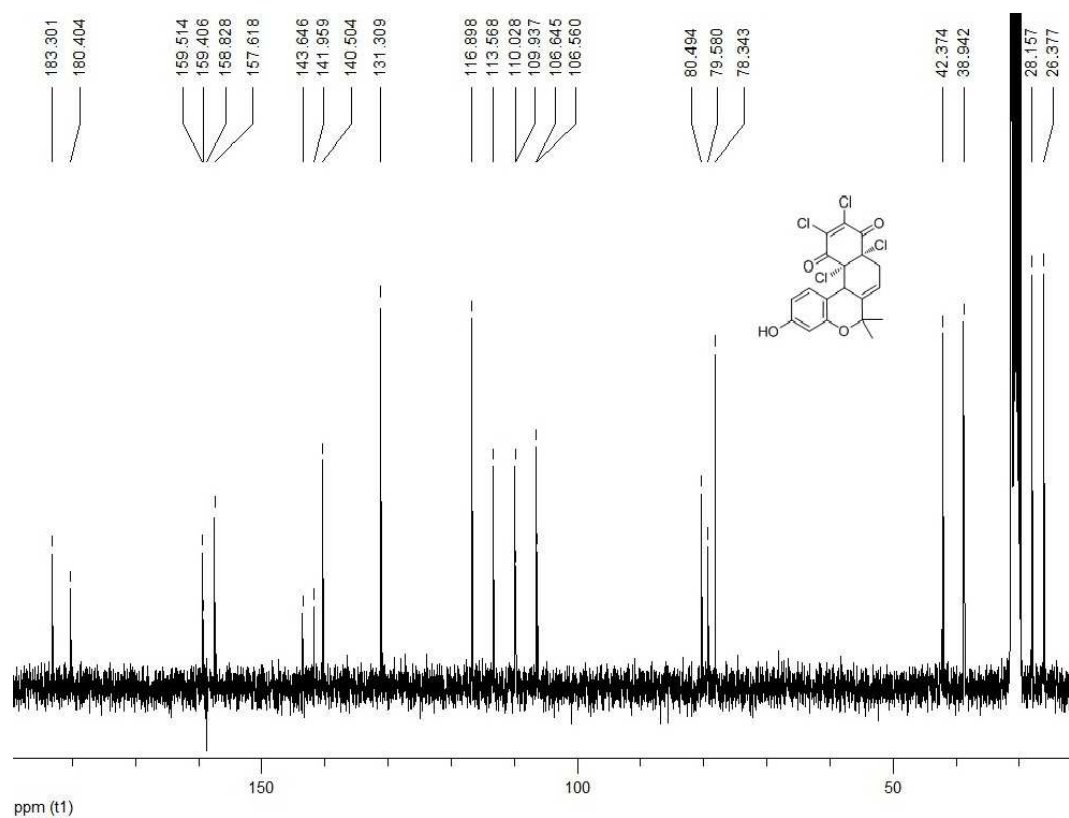

**21{5,3}:**

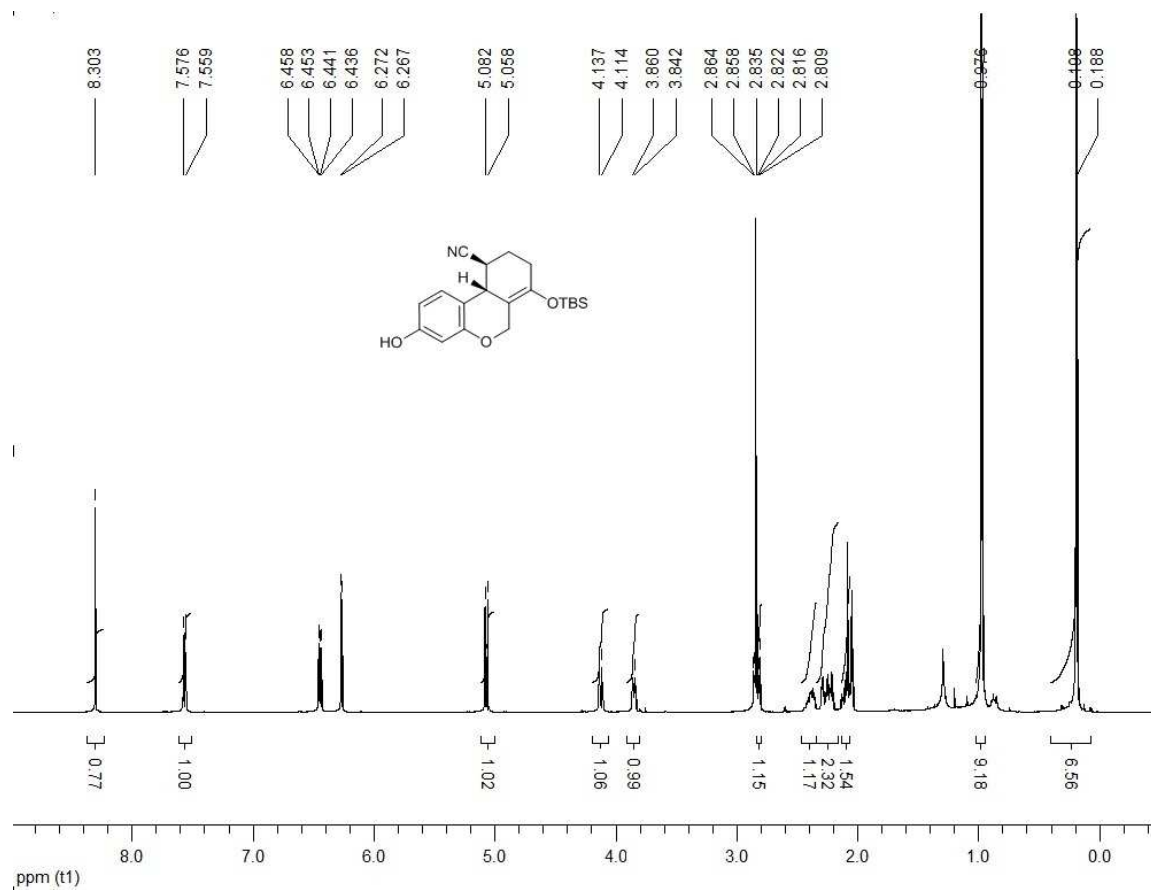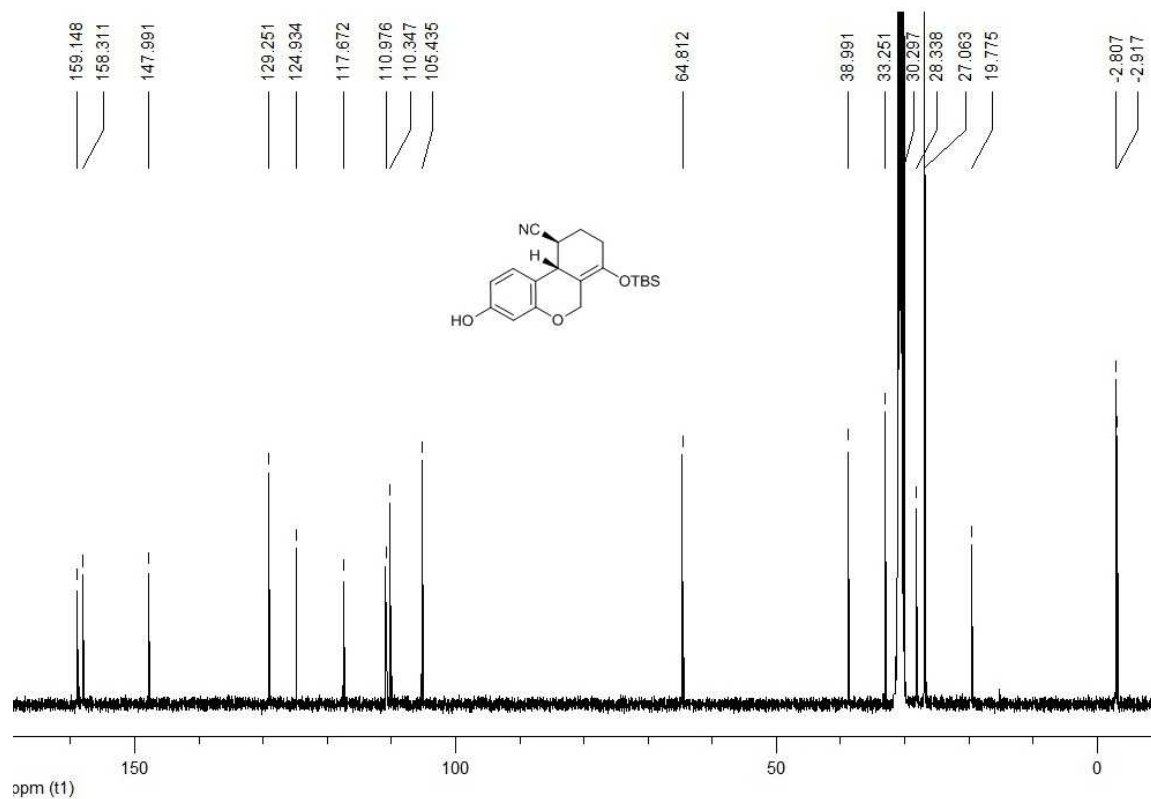

Supplement: Supplementary file 1 [file 4265473]
